# Supplementary material for: High-throughput screening of metal–organic frameworks for kinetic separation of propane and propene
Source: Royal Society of Chemistry journal article supplement (doi:10.1039/d0cp03790g), 2020-01-01
Supplement: d0cp03790g1.zip [file d0cp03790g1.zip]

## Sheet: Content
Supplementary information for
High-Throughput Screening of Metal-Organic Frameworks for Kinetic Separation of Propane and Propene
Yohanes Pramudya, a† Satyanarayana Bonakala, a Dmytro Antypov, a Prashant M. Bhatt, b Aleksander Shkurenko, b Mohamed Eddaoudi, b Matthew J. Rosseinsky, a Matthew S. Dyer*a
a. Department of Chemistry, University of Liverpool, Liverpool L69 7ZD, United Kingdom.
b. King Abdullah University of Science and Technology (KAUST), Physical Sciences and Engineering Division, AMPM Center, Functional Materials Design, Discovery and Development Research Group (FMD3), Thuwal, Saudi Arabia
† Current address: Institute of Nanotechnology, Karlsruhe Institute of Technology, Karlsruhe 76344, Germany.
Content:
1440 UFF-FM MD	the results of all successful 5ns MD calculations of guest diffusion at 400K
545 1st NEB setup	the results of all successful UFF-FM NEB calculations using 1st NEB setup
513 2nd NEB setup	the results of all successful UFF-FM NEB calculations using 2nd NEB setup
505 both NEB setups	the combined results of all successful UFF-FM NEB calculations using 1st and 2nd NEB setups
116 UFF-FM NEB barriers	the selection of successful UFF-FM NEB calculations for wich diffusion barrier for propane was at least 10 kJ/mol higher than that for propene
23 DFT NEB barriers	the results of the DFT NEB calculations
Summary	the individual outcomes of screening for each entry in the CoRE MOF database presented in the order they were discarded

## Sheet: 1440 UFF-FM MD
neither diffused in MD				only propene diffused in MD				only propane diffused in MD				both diffused in MD					All tried in MD
porosity descriptors		CSD refcode		porosity descriptors		CSD refcode		porosity descriptors		CSD refcode		porosity descriptors		CSD refcode			porosity descriptors		CSD refcode
Df (Å)	Di (Å)			Df (Å)	Di (Å)			Df (Å)	Di (Å)			Df (Å)	Di (Å)				Df (Å)	Di (Å)
2.50004	5.14664	ZEFVOX		2.50215	3.92289	GIKMOD03		2.55853	3.27787	XUPCAM		2.50635	3.43999	VAZLAL			2.50004	5.14664	ZEFVOX
2.50204	5.88664	FELWAW		2.50996	3.56695	OPURIB01		2.57144	3.92332	GIKMOD12		2.51729	4.04228	LIRNEH			2.50204	5.88664	FELWAW
2.50265	4.5706	FUYYAA		2.51115	4.56845	LACGAZ		2.63435	4.15862	INESIE		2.51767	4.13062	NERVIP01			2.50215	3.92289	GIKMOD03
2.5027	5.15122	ZEFVIR		2.51243	5.11734	IQOZUJ		2.64304	5.30487	QISVAQ		2.51891	3.28119	KINLAW			2.50265	4.5706	FUYYAA
2.50478	3.07453	CILDAD		2.529	3.94077	GIKMOD04		2.68407	3.39894	MUXHIW01		2.53081	9.95261	MUDLIH			2.5027	5.15122	ZEFVIR
2.50502	3.789	IFEPIT		2.53368	3.93179	GIKMOD05		2.70818	3.78954	GAWMAU		2.53181	4.49041	MAFZOK			2.50478	3.07453	CILDAD
2.50642	4.91794	NERVEL		2.54566	3.89478	LUTDAG		2.7932	4.1516	DAWWIJ		2.53592	4.08571	CISMAT01			2.50502	3.789	IFEPIT
2.50912	4.0943	XOJCUV		2.5461	3.89894	LUTCIN		2.8294	3.74512	REYCEF		2.53784	3.85981	VAZLUF			2.50635	3.43999	VAZLAL
2.50992	5.9068	FELWIE		2.55814	3.92652	LUTBEI		2.85499	3.40713	CDLGLU12		2.55721	3.32541	UMELUU			2.50642	4.91794	NERVEL
2.51015	3.9282	GIKMOD02		2.5592	3.90986	LUTCAF		2.86814	4.38076	WEMHED		2.5606	3.40788	CUKVUA			2.50912	4.0943	XOJCUV
2.51109	3.20048	IWEPUW		2.5601	3.96173	GIKMOD06		2.86998	4.23931	PUQHEP		2.56398	4.09182	SETWOF			2.50992	5.9068	FELWIE
2.51122	3.28684	HAOAER		2.5601	3.96173	GIKMOD07		2.90368	4.80366	BIHMUC		2.56404	3.94831	LUSZOP			2.50996	3.56695	OPURIB01
2.51178	4.09389	TOHPUC		2.56651	3.94198	GIKMOD08		2.90945	3.62257	OXAMIK		2.56819	4.03121	ASALIP			2.51015	3.9282	GIKMOD02
2.5161	3.90111	HEZSEK		2.56857	3.94583	LUSZOP01		2.94252	3.49905	HEDGUS		2.57418	3.91613	LUSZIJ			2.51109	3.20048	IWEPUW
2.51848	3.81265	YAPYUK		2.56912	3.51928	QOPHEI		3.14505	4.22555	PUWCOZ		2.57418	10.4685	KEJQAR01			2.51115	4.56845	LACGAZ
2.51861	3.46967	KUGQIN		2.56912	3.94192	LUSZUV		3.1465	4.32919	OYEBIE		2.59819	4.01632	GELJAJ			2.51122	3.28684	HAOAER
2.52089	3.57373	NIKDIU		2.57303	3.93885	LUSZIJ01		3.17559	4.12508	ILOTOT		2.61442	2.94099	PARPII			2.51178	4.09389	TOHPUC
2.52759	3.61049	PUNFIO		2.58011	3.94339	GIKMOD09		3.2219	4.52583	FIHLUF		2.61511	3.37043	GIRFUJ			2.51243	5.11734	IQOZUJ
2.53108	4.29359	EVUMUE		2.5829	3.93905	LUTBUY		3.25219	4.09478	SEYDUW		2.61724	3.55107	GUJTOV			2.5161	3.90111	HEZSEK
2.53239	5.91981	FELVEZ		2.58728	3.9269	LUTCEJ		3.28712	3.66162	BUSGIG		2.619	10.6945	NAFRUI			2.51729	4.04228	LIRNEH
2.53303	4.11804	FEVDIV		2.59885	3.94696	GIKMOD10		3.36062	5.26678	DOGZIJ		2.62342	4.49519	GAWMOI			2.51767	4.13062	NERVIP01
2.53482	4.26412	UZAFAD		2.61071	3.33124	GETXAG		3.39668	3.98841	WASNIO		2.63453	4.60619	HIWLOO			2.51848	3.81265	YAPYUK
2.53854	4.0744	EMICUZ		2.61268	3.92028	GIKMOD11		3.5005	3.83387	DORFOG		2.63845	5.15292	ETAXIH			2.51861	3.46967	KUGQIN
2.54228	4.83585	ICAGAU		2.61552	4.43325	UNIPAJ		3.7404	5.28773	BUSQEM		2.65794	3.72992	AMALND			2.51891	3.28119	KINLAW
2.55363	3.68933	WEWGAH		2.61776	3.84426	GELVEZ		3.83478	4.91533	WENDIE		2.65989	5.34851	QISVEU			2.52089	3.57373	NIKDIU
2.55379	3.95095	HORCOH		2.62136	3.32627	MUXHUI01		3.99855	4.70974	PEBNEP		2.66157	3.4986	JAHNEM			2.52759	3.61049	PUNFIO
2.55442	3.93708	GIKMOD		2.62616	4.22154	WUZRUE		4.1234	4.82402	HEXNII		2.66439	3.34875	ESUMOU01			2.529	3.94077	GIKMOD04
2.55624	3.61922	FAFJIH		2.63566	3.8103	GELVEZ01						2.68325	4.86697	QATHIE			2.53081	9.95261	MUDLIH
2.55625	3.82815	GELVEZ02		2.67319	3.39058	MUFJAZ01						2.68849	4.44401	LASQON			2.53108	4.29359	EVUMUE
2.55685	7.73837	BARZAW		2.72478	3.46252	DIZQOT						2.69337	5.9292	TIFDOB			2.53181	4.49041	MAFZOK
2.55733	3.70259	HIDMEO		2.7409	4.06064	KEXPOU						2.69612	5.0717	TACYAX			2.53239	5.91981	FELVEZ
2.56071	4.84675	GUSCIH		2.76994	3.40131	CDLGLU10						2.69721	4.76352	OMAWOP			2.53303	4.11804	FEVDIV
2.56403	4.71706	IHIWIF		2.78544	3.80978	VAQLAC						2.69874	3.58947	PUPNAQ			2.53368	3.93179	GIKMOD05
2.56897	5.12922	LUPHIN		2.7861	3.87598	XUWVEQ						2.70306	4.99322	JOGBIR			2.53482	4.26412	UZAFAD
2.57734	6.00155	IJENER		2.79775	4.11875	CAKXOD						2.71207	4.40485	GAXWEJ			2.53592	4.08571	CISMAT01
2.58122	3.98209	HORCUN		2.81383	3.85934	UJAQAY						2.71894	2.98206	POJTUE			2.53784	3.85981	VAZLUF
2.58872	3.51546	JOCPIB		2.81759	4.13408	CAKXIX						2.73045	3.45453	ULUPUM01			2.53854	4.0744	EMICUZ
2.59038	3.58044	ITETEH		2.82776	4.14523	CAKXET						2.73654	4.99964	LOLQIM			2.54228	4.83585	ICAGAU
2.59156	4.51369	KAXZUG		2.83696	4.533	PASKAX						2.73664	3.82713	UTOTUT			2.54566	3.89478	LUTDAG
2.59168	5.97797	FELVOJ		2.85255	4.85681	COYTUG01						2.73853	2.96169	QOVWOO			2.5461	3.89894	LUTCIN
2.59179	3.75468	ECUCOV		2.85269	7.85146	GEGSIW						2.74524	2.97586	XEKDUO			2.55363	3.68933	WEWGAH
2.59235	4.80101	KOLWEO		2.86096	4.20107	EXIDEV						2.75887	3.55956	LICSUM			2.55379	3.95095	HORCOH
2.59294	3.41421	QITMUC		2.90422	5.45393	ZAVMIU						2.7668	3.18076	CESYEF01			2.55442	3.93708	GIKMOD
2.59337	7.74818	BARZIE		2.92557	4.7556	HEDCEA						2.7709	4.82166	MICNIW			2.55624	3.61922	FAFJIH
2.59389	3.74248	XEJJOM		2.93224	4.86988	COYTUG						2.77166	3.9762	RUFMUA			2.55625	3.82815	GELVEZ02
2.5942	4.51896	LIHSIF		2.95571	6.20375	TISKOW						2.78558	3.01628	SADMIV			2.55685	7.73837	BARZAW
2.59565	3.16473	ZNGLUD01		2.95812	3.94719	KIYMAI						2.79051	3.00083	GUSNEN01			2.55721	3.32541	UMELUU
2.59641	3.79529	MAQZOV		2.9644	4.17363	WALBOC						2.79467	5.16319	VEFLUP			2.55733	3.70259	HIDMEO
2.59798	3.55623	NABCIE		2.9646	5.82793	DOKHOB						2.79544	4.05573	NASCIV			2.55814	3.92652	LUTBEI
2.59839	3.94507	YUJNIB		2.97152	3.91146	HAZGOF04						2.79989	4.72338	KEXKEF			2.55853	3.27787	XUPCAM
2.59845	4.07173	WOWHEV		2.98662	3.98401	IVARUT						2.80491	3.94229	GUJVIR			2.5592	3.90986	LUTCAF
2.59859	6.18628	VAQLEG		2.99139	3.92084	HAZGOF03						2.80806	3.68992	KAFYAT			2.5601	3.96173	GIKMOD06
2.60004	3.4618	ZEJCUO		2.99503	5.60217	UNEBIZ						2.81125	4.6846	DEJCEB			2.5601	3.96173	GIKMOD07
2.60014	4.3435	EVUNAL		3.00882	3.98213	GATHAL						2.81425	3.70645	ZEDRAD			2.5606	3.40788	CUKVUA
2.60028	5.23877	VEJYUF01		3.01821	4.8567	COYVES01						2.81869	4.92925	TETWUM			2.56071	4.84675	GUSCIH
2.60046	4.30377	XEHFUL		3.02112	3.80992	SETXAS						2.83389	3.4806	VIGRIO			2.56398	4.09182	SETWOF
2.60112	3.75849	HELCUY		3.03297	4.70614	HEBTAL						2.83449	3.89192	QALNIA			2.56403	4.71706	IHIWIF
2.60168	3.83677	FASHUD		3.05346	3.98906	ADABIS						2.83675	3.1244	FEXHOG01			2.56404	3.94831	LUSZOP
2.60346	3.79701	FALJAF		3.05406	3.99152	TIQGEG						2.83679	3.6186	OKILIE			2.56651	3.94198	GIKMOD08
2.60838	4.92903	HAZNON		3.06175	4.87211	COYVES						2.84828	4.14327	JODGEP			2.56819	4.03121	ASALIP
2.60872	3.59028	CIQYUX		3.07037	3.98024	TIQGEG01						2.85025	3.84897	NUXMAU			2.56857	3.94583	LUSZOP01
2.61069	4.92199	HEFDIH		3.08082	4.1309	WICQIJ						2.85433	4.75314	MIHBAG			2.56897	5.12922	LUPHIN
2.61175	3.83347	PAPPIH		3.09275	3.74304	FUFREE						2.858	5.05755	IJEXUR			2.56912	3.51928	QOPHEI
2.61456	3.16738	TIVFEK		3.11713	4.39579	FERVOP						2.87211	3.68436	JOJLOK			2.56912	3.94192	LUSZUV
2.61759	3.51564	QITMOW		3.118	3.65608	DOHYIJ						2.87906	4.66531	QARTEK			2.57144	3.92332	GIKMOD12
2.61921	3.51244	XAKRAE		3.11952	5.18489	KAFTUI						2.88315	3.28814	CESYEF			2.57303	3.93885	LUSZIJ01
2.62	3.78574	XEJJIG		3.12538	3.82629	PAZXUJ						2.88357	3.2446	ECASOS			2.57418	3.91613	LUSZIJ
2.62002	5.16963	VAGKOF		3.12659	5.48857	EQOCES01						2.88368	3.82744	XOVYUD			2.57418	10.4685	KEJQAR01
2.62071	4.91208	XEXNEV		3.13827	4.38344	BIVXEK						2.88546	8.78202	HOWQOA			2.57734	6.00155	IJENER
2.62585	5.30725	XAGDAL		3.14077	3.73047	CUYQIX						2.88696	3.93702	MAYXUG			2.58011	3.94339	GIKMOD09
2.62761	5.21305	YICGOI		3.14651	4.9696	GAMTAQ						2.89336	4.14903	UFUNAK			2.58122	3.98209	HORCUN
2.62968	4.36696	EVUNIT		3.15399	3.70221	RUBHOM						2.89993	4.27619	RURQEB			2.5829	3.93905	LUTBUY
2.63132	4.38284	EVUNEP		3.17537	13.1275	EJEGOQ						2.90369	3.58332	NELWIL			2.58728	3.9269	LUTCEJ
2.63151	4.52428	CUYVOI		3.17631	4.97155	XULCIR						2.90391	4.0118	KIQKOK			2.58872	3.51546	JOCPIB
2.63187	5.88328	CELZIE		3.18308	3.61932	NATXIR						2.92231	4.11681	RUFMUA01			2.59038	3.58044	ITETEH
2.63267	5.53611	XAGCIS02		3.19057	6.77675	HIYZEV01						2.93857	3.45164	PEKKAS			2.59156	4.51369	KAXZUG
2.63372	3.81019	ZIJVAR		3.20315	4.96917	GAMTEU						2.93929	3.81217	GURZID			2.59168	5.97797	FELVOJ
2.63619	4.3132	ETUWOG		3.20462	3.94913	QUVDUH						2.94018	3.40814	NHBZZN10			2.59179	3.75468	ECUCOV
2.64049	3.09554	MEHPAQ		3.20599	4.35025	DAJHUS						2.9479	3.51375	FOHCAH			2.59235	4.80101	KOLWEO
2.64138	4.91469	LERNEC01		3.20855	4.79078	GEPDIQ						2.94858	4.04292	OVIZUP			2.59294	3.41421	QITMUC
2.64299	3.82979	DODHUA		3.21043	4.2322	XAXQEU						2.94879	3.32747	FIHXUR			2.59337	7.74818	BARZIE
2.64336	3.79378	ECUCIP		3.21135	5.1973	XINJAH						2.95204	5.12907	MICPEU			2.59389	3.74248	XEJJOM
2.6439	3.16369	CUGLTM01		3.21457	9.73254	WUQRAC						2.95361	3.91786	UFUTIY			2.5942	4.51896	LIHSIF
2.64485	5.57315	XAGCIS01		3.23579	4.31173	VIPXUO						2.96848	3.67281	UGEPEB01			2.59565	3.16473	ZNGLUD01
2.64725	3.88706	MOGVAG		3.23595	5.06549	FUZKAN						2.96877	3.58458	RUBHUS			2.59641	3.79529	MAQZOV
2.65055	4.30951	MAYPIM		3.23803	5.10703	GIFFEI						2.96952	3.91448	HAZGOF05			2.59798	3.55623	NABCIE
2.65292	4.21897	GEHSAN		3.24781	4.18118	AHUTIH01						2.97127	3.675	GUXQAR			2.59819	4.01632	GELJAJ
2.65429	3.16189	TIVFAG		3.25151	4.17677	ODAJAG						2.97363	3.13727	NIRDEX			2.59839	3.94507	YUJNIB
2.65551	3.57984	EVOHOM		3.25406	4.46396	BEPVAV						2.97561	3.55675	QUGNOV			2.59845	4.07173	WOWHEV
2.65556	4.10947	WOWHAR		3.25534	6.19412	NOFQII						2.97954	4.33819	HENYUV			2.59859	6.18628	VAQLEG
2.65632	3.48335	MUPYUS		3.25577	5.12876	GIFFAE						2.97979	4.58385	NISCOJ			2.59885	3.94696	GIKMOD10
2.65637	4.13022	OGIYAF		3.25763	4.95313	COYVAO01						2.9815	3.71353	SETWUL			2.60004	3.4618	ZEJCUO
2.66018	5.55946	XAGCIS		3.26187	3.98887	ADABAK01						2.98231	3.8697	HAZGOF07			2.60014	4.3435	EVUNAL
2.66132	5.00175	LERNEC		3.282	4.82667	DAPXEZ						2.98365	3.9069	HAZGOF08			2.60028	5.23877	VEJYUF01
2.66271	3.19455	ZNGLUD		3.28243	3.69182	POXHIU						2.98497	3.90842	HAZGOF06			2.60046	4.30377	XEHFUL
2.66619	3.87967	CIGYAU		3.2937	3.7089	WONXIH						2.98646	3.58495	UGEPEB			2.60112	3.75849	HELCUY
2.66625	4.73547	WEYMIY		3.29845	3.6953	POXHOA						2.98909	3.60944	YEGTAG			2.60168	3.83677	FASHUD
2.66706	5.19652	DUXKEN		3.29929	11.7128	HIFVUO01						2.99216	4.95326	MICPAQ			2.60346	3.79701	FALJAF
2.67066	3.41421	MUFJED		3.30187	4.19352	FOHSAW01						2.99426	3.96623	DEHBIC			2.60838	4.92903	HAZNON
2.67373	3.24837	XUNJOG		3.30607	4.13987	SEYFAE						2.99921	4.92418	UVEWIC01			2.60872	3.59028	CIQYUX
2.67531	3.43867	XAKQIL		3.30829	4.79448	LALPIZ						3.0014	3.97321	HAZGOF			2.61069	4.92199	HEFDIH
2.67572	5.28761	BERGAI		3.31702	3.85878	BIBBUL						3.00485	4.41466	HESVOR			2.61071	3.33124	GETXAG
2.67675	3.28889	SESDEA		3.31743	4.03909	AMUCOB						3.00678	3.57551	HAJJAE			2.61175	3.83347	PAPPIH
2.68133	5.6698	CELKEL		3.32777	3.73118	DOHYIJ01						3.00737	3.73148	YEGYIU			2.61268	3.92028	GIKMOD11
2.69075	3.17988	CUGLTM		3.3542	5.52712	AXUHIL						3.00777	6.35613	GAXWAF			2.61442	2.94099	PARPII
2.6928	6.44721	VUNYUZ		3.36595	4.54965	MOYNEU						3.02184	3.88897	HAZGOF01			2.61456	3.16738	TIVFEK
2.69394	3.52077	NEJSIG		3.3664	5.32693	GOMRAC						3.03435	4.16667	CAVSOJ			2.61511	3.37043	GIRFUJ
2.69518	3.46941	AMIKOX		3.37252	5.9815	NETFAU						3.03502	3.86175	GIZVER			2.61552	4.43325	UNIPAJ
2.69903	3.3093	MODDEP		3.40268	7.27569	UBACUX						3.03737	4.22366	JEBDOK			2.61724	3.55107	GUJTOV
2.70328	4.19485	AZILEA		3.43471	3.8316	MIZKOW						3.03812	3.59982	YORZAH			2.61759	3.51564	QITMOW
2.70419	4.38937	ZETQIA		3.44165	5.2733	LACGED						3.0429	3.1989	GUSNEN			2.61776	3.84426	GELVEZ
2.70603	3.76405	CABQEB		3.44611	4.29825	XENMOU						3.04753	5.06313	PETVER			2.619	10.6945	NAFRUI
2.70694	4.38238	GINDEO		3.45747	6.25588	QEZZOL						3.05113	5.35488	VIZQEC			2.61921	3.51244	XAKRAE
2.71437	4.07847	BERFIP		3.45753	4.34506	FOHQUO						3.05212	3.70848	AGESIP			2.62	3.78574	XEJJIG
2.72313	4.83403	XOQXOR		3.46995	4.54882	NERTAH						3.06361	3.51407	TAXHUX			2.62002	5.16963	VAGKOF
2.72372	3.25557	JASNEX		3.47181	3.78387	GIKQIC						3.07239	5.01317	GEFFUT			2.62071	4.91208	XEXNEV
2.72512	3.83514	BONWAD		3.47614	4.27091	PEGBEK02						3.07422	4.66454	ICIZOL			2.62136	3.32627	MUXHUI01
2.72619	4.56007	LOQSEQ		3.48109	5.41352	WIDZUG						3.07582	6.10604	GAXVUY			2.62342	4.49519	GAWMOI
2.72795	3.68052	GAWBEM		3.48306	4.51038	ITIBOD						3.07956	3.67442	OFUDUQ			2.62585	5.30725	XAGDAL
2.73604	4.43317	ZETQEW		3.48491	4.34072	XEJWUG						3.08346	5.12422	SULKIU			2.62616	4.22154	WUZRUE
2.7399	7.65896	BARZOK		3.49743	4.25802	GULPIN						3.08502	4.2178	CAHNEF			2.62761	5.21305	YICGOI
2.74095	3.98106	GUJVOX		3.51016	4.82164	HADQUA						3.08506	5.69113	AXOHIE			2.62968	4.36696	EVUNIT
2.74105	3.78403	QALNEW		3.51033	6.91296	LEDLAJ						3.08683	4.35468	MOJJUR			2.63132	4.38284	EVUNEP
2.74254	4.02936	CAKYIY		3.51548	4.67713	XOBXIW						3.09221	3.89114	PENZUE			2.63151	4.52428	CUYVOI
2.74753	3.72517	NIRDOI		3.52297	4.59329	TEVZEA						3.0939	4.22766	QUPHIT			2.63187	5.88328	CELZIE
2.75116	4.37576	MIYHAE		3.52892	5.01403	RIDGIW						3.09956	3.73735	RATVEP			2.63267	5.53611	XAGCIS02
2.75514	4.81582	LOJNAA		3.53409	4.59875	KILFUI						3.10287	4.59413	KOGJOG			2.63372	3.81019	ZIJVAR
2.75795	4.05316	CAKYEU		3.54585	4.85387	SOTTUR						3.10761	3.92715	YAZYEF			2.63435	4.15862	INESIE
2.75862	3.2844	FASJAL		3.55494	8.28708	XALDEU						3.11351	4.77902	WEHNAA			2.63453	4.60619	HIWLOO
2.76098	3.95804	EBIPIQ		3.5623	5.09454	WEMCEY						3.12705	4.87095	ECUDEM			2.63566	3.8103	GELVEZ01
2.76215	4.38482	ZETQAS		3.5679	4.59869	RAVVIU01						3.1317	4.97756	TIKMUW			2.63619	4.3132	ETUWOG
2.7632	5.80705	CITXUZ		3.5768	4.57827	RAVVIU						3.13681	4.14606	RAQVEM			2.63845	5.15292	ETAXIH
2.77205	4.73091	CUNXIS10		3.57779	4.74887	EBEMII						3.13696	4.21709	UFUMUD01			2.64049	3.09554	MEHPAQ
2.77205	4.73091	CUNXIS		3.58268	4.82436	TESGUU						3.13884	5.1388	QEKLID01			2.64138	4.91469	LERNEC01
2.77473	4.3933	ZETPUL		3.58733	6.53637	DAGDIZ						3.13948	3.49003	BOWQAG			2.64299	3.82979	DODHUA
2.77559	5.20555	NERVOV		3.59008	7.2826	UQULAU						3.14648	3.56239	CUYHIO			2.64304	5.30487	QISVAQ
2.77756	4.01951	ROJNEJ		3.59258	5.04252	YELYOE						3.14713	4.68881	DIMQOH			2.64336	3.79378	ECUCIP
2.77879	4.04164	CAHSOU		3.59662	6.33441	DICVES						3.14835	3.80785	MINCER			2.6439	3.16369	CUGLTM01
2.78001	5.64584	ROSCEH		3.60567	4.27901	XEJXAN						3.1503	5.52453	SAQZOB			2.64485	5.57315	XAGCIS01
2.7809	4.77494	HEDTER		3.60956	4.68206	HIBGEF						3.15216	11.3713	FAWCEN03			2.64725	3.88706	MOGVAG
2.78115	5.3179	GIZJOP		3.61461	5.93426	QUPJAN						3.15333	3.95096	PEVZAT			2.65055	4.30951	MAYPIM
2.7831	4.5778	GIHBII		3.61538	4.60883	NIKZAJ01						3.15373	5.12126	QEKLID			2.65292	4.21897	GEHSAN
2.78322	4.08997	CAKYAQ		3.61774	4.82351	EBEMEE						3.15385	4.75617	UVASAM			2.65429	3.16189	TIVFAG
2.78811	3.93149	ECOSIY		3.62215	4.66461	EDAGAT						3.1608	4.83288	TACJIS			2.65551	3.57984	EVOHOM
2.78834	3.73773	YOPMAS		3.62787	4.58202	APEBED						3.16468	3.95311	GUQTOB			2.65556	4.10947	WOWHAR
2.79398	5.58826	QIFLIC		3.63147	4.66068	RATDAS02						3.16561	5.0417	QIDDAI02			2.65632	3.48335	MUPYUS
2.80032	5.0932	JEJKEP		3.63666	4.76348	XEHSOT						3.16629	3.32714	NAXKOO01			2.65637	4.13022	OGIYAF
2.80345	3.78	RAXDAX		3.6396	5.3838	GOMREG						3.16651	4.21645	EMUYAM			2.65794	3.72992	AMALND
2.8039	5.15858	OKIPOO		3.6399	5.70679	AVIMUO						3.17403	4.76443	UVARIT			2.65989	5.34851	QISVEU
2.80454	4.11931	PUQHIT		3.64055	5.20142	DEYJOI						3.17805	5.78061	KOJYEO			2.66018	5.55946	XAGCIS
2.8069	7.44304	ICANEH		3.64059	4.89772	TEVZIE						3.1789	4.93461	ZIMJOW			2.66132	5.00175	LERNEC
2.80803	4.97103	ESIPUR		3.64376	4.9018	NIKYUC						3.17956	5.01325	ZEZPOL			2.66157	3.4986	JAHNEM
2.80911	3.35506	PELNEA01		3.64676	4.81303	XEHSIN						3.18244	4.10943	QUQPUO			2.66271	3.19455	ZNGLUD
2.81232	4.522	POVXII		3.65202	4.70077	RAVVOA02						3.18473	5.34637	GIQZIQ			2.66439	3.34875	ESUMOU01
2.81637	4.40281	OVIDON		3.65221	4.78045	TEHRUU						3.18487	3.8471	KILJEV			2.66619	3.87967	CIGYAU
2.81655	4.9703	ESIPUR02		3.65894	4.63178	RAVVOA01						3.1886	4.07915	RUSSAA			2.66625	4.73547	WEYMIY
2.82759	5.10514	OKIQAB		3.65952	4.88747	XEHSAF						3.18862	3.93864	CECVOW			2.66706	5.19652	DUXKEN
2.82848	8.97123	IDORIE		3.66075	4.99192	KAXQOR01						3.18904	3.84281	ICIZAV			2.67066	3.41421	MUFJED
2.83052	3.63337	HOJLEY		3.66332	4.82471	NIHBEM						3.19398	3.57848	YASPEP			2.67319	3.39058	MUFJAZ01
2.83423	4.30719	KOMHAW		3.6653	5.40502	DUYRAR						3.19633	4.01364	PEVYUM			2.67373	3.24837	XUNJOG
2.83611	4.02535	HARNAR		3.66818	5.04305	PELXIP						3.19787	4.04514	JOVDON			2.67531	3.43867	XAKQIL
2.83674	4.1572	PASNEE		3.67275	4.89378	REJVOS						3.207	4.20642	BAHGUN02			2.67572	5.28761	BERGAI
2.83702	4.16556	IPOWOA		3.6752	4.69215	RATCUL01						3.20856	3.94859	CECVIQ			2.67675	3.28889	SESDEA
2.83796	5.54039	KAVREG		3.67769	4.75058	NAXVOY01						3.2095	3.71518	UKUMAO01			2.68133	5.6698	CELKEL
2.84337	3.99789	COXQUB		3.68126	4.76846	NAXVOY02						3.21073	3.80006	UKULOB01			2.68325	4.86697	QATHIE
2.84597	5.16363	GAGXAP		3.68194	4.72463	NIKYOW02						3.21316	6.6717	XUCNOZ			2.68407	3.39894	MUXHIW01
2.84987	4.0642	EJEFOP		3.68372	4.87963	NIHBEM01						3.21394	3.99432	LUKRUE			2.68849	4.44401	LASQON
2.85009	4.96921	WAHREE		3.68791	4.94759	NIKYUC01						3.2197	3.82761	UKULOB			2.69075	3.17988	CUGLTM
2.8532	4.61324	ITIBET		3.68938	4.67382	NIKZAJ02						3.2214	4.01646	LARZEL			2.6928	6.44721	VUNYUZ
2.85573	6.56223	MECLEL		3.6902	5.27957	DUYRIZ						3.22631	4.22559	BAHGUN01			2.69337	5.9292	TIFDOB
2.85919	15.9326	MIHHER		3.69066	4.90414	EDAGEX						3.22707	4.94226	UVEWIC			2.69394	3.52077	NEJSIG
2.86382	3.16551	XUNJIA		3.69522	5.24657	MODNIC						3.22734	5.22596	MICNES			2.69518	3.46941	AMIKOX
2.86447	4.15649	XADFEP		3.69977	5.41837	DUYREV						3.23031	3.88653	HUSQES			2.69612	5.0717	TACYAX
2.86477	3.71564	TEBCEK		3.70751	4.82301	NIKZEN						3.23056	3.76852	UKUMAO			2.69721	4.76352	OMAWOP
2.8656	3.57107	ECUCUB		3.71164	4.86464	NIKZEN01						3.23786	4.25391	NIRNAD			2.69874	3.58947	PUPNAQ
2.86572	4.01882	VODPOU		3.72749	4.70959	RATCUL02						3.24604	4.5216	REGLOG			2.69903	3.3093	MODDEP
2.87014	5.00686	TAFCIO		3.73257	4.50943	NEJSAY						3.25348	3.48373	RUPZIM			2.70306	4.99322	JOGBIR
2.87105	4.53798	PEFTAX		3.73403	5.10081	ACIBIY						3.25565	4.19765	CAVTAW			2.70328	4.19485	AZILEA
2.87136	5.56636	KAVROQ		3.74388	4.49986	KINKAV						3.2565	4.21795	IDAGUR			2.70419	4.38937	ZETQIA
2.87682	6.41127	XAGCUE		3.74465	5.70035	RETBEZ						3.25927	4.08097	LULHUW			2.70603	3.76405	CABQEB
2.87726	4.99341	FIGQUJ		3.76853	5.12402	TEWFUY						3.25933	4.25449	BAHGUN03			2.70694	4.38238	GINDEO
2.87742	3.81372	MAKSUO		3.77339	5.12552	LIDZUV						3.26113	4.00306	GIRGUL			2.70818	3.78954	GAWMAU
2.87904	4.91214	OKIPUU		3.77956	5.30567	DUYROF						3.26537	4.21823	UFUMUD			2.71207	4.40485	GAXWEJ
2.87938	4.38811	PEFSEA		3.78234	5.06856	NIKYUC02						3.26666	4.83353	WASNOU			2.71437	4.07847	BERFIP
2.88021	4.40845	NABNUA		3.7831	4.74713	RATCUL03						3.26762	4.19485	AHUTIH			2.71894	2.98206	POJTUE
2.88893	4.2216	QUKYUR		3.78432	5.01891	NIHBEM02						3.28233	4.10367	UQUHAQ			2.72313	4.83403	XOQXOR
2.89067	4.31995	QUKYOL		3.78699	4.94738	NIKZEN02						3.28559	4.77617	OPAPUR			2.72372	3.25557	JASNEX
2.89089	6.44441	BAKLIK		3.78928	4.73753	XEHSUZ						3.2871	5.83356	YEGTEK			2.72478	3.46252	DIZQOT
2.90353	4.78685	VONBUW		3.79158	5.18714	DEYJIC						3.28764	4.27373	BAHGUN04			2.72512	3.83514	BONWAD
2.90436	4.61538	XEJTIR		3.79614	4.80581	NEVVEQ						3.29458	4.79997	OPAPOL			2.72619	4.56007	LOQSEQ
2.90765	3.88622	XUYDIF		3.80264	5.71951	YIWMEW						3.29583	3.77572	CEHWIX			2.72795	3.68052	GAWBEM
2.91097	15.2984	MIHHIV		3.81153	5.76642	VAKBIU						3.29667	4.75257	QOVGOY01			2.73045	3.45453	ULUPUM01
2.91526	4.46543	VAJTUX		3.81876	4.76721	TUDQOZ						3.29694	5.77464	WAZQUL			2.73604	4.43317	ZETQEW
2.91754	6.68004	IBOTAU		3.83765	4.9953	YANBAR02						3.30578	11.7415	IMIDZB10			2.73654	4.99964	LOLQIM
2.92426	4.11167	KOBPIB		3.8442	4.49857	DEGJIK						3.30617	4.75346	QOVGOY			2.73664	3.82713	UTOTUT
2.93078	3.62654	DAHWAM		3.84842	4.48691	NARTIL						3.30941	4.32153	QERZUI			2.73853	2.96169	QOVWOO
2.93141	3.70731	BONWIL		3.84947	5.24315	TESHAB						3.30977	7.57165	TEBWII			2.7399	7.65896	BARZOK
2.93207	3.68471	LUWYUY		3.85188	5.24127	XEHSEJ						3.31506	4.54949	ADABUE			2.7409	4.06064	KEXPOU
2.93292	5.75047	MAZJEC		3.85906	4.62011	FIYDOH						3.31524	5.93538	SENWEP			2.74095	3.98106	GUJVOX
2.93792	7.03145	ILUGAY		3.86694	4.94583	LIFWEE						3.31551	5.79634	WAZRAS			2.74105	3.78403	QALNEW
2.94053	4.48463	PIGXAF		3.87237	7.76134	YEZFIU						3.32227	4.50011	AGUWUV			2.74254	4.02936	CAKYIY
2.9425	5.84732	MAZJAY		3.8906	4.95206	NEYBEZ						3.32278	3.72291	BUSGOM			2.74524	2.97586	XEKDUO
2.94614	4.99199	PURRIE		3.89271	5.30133	NIHBIQ01						3.32695	4.83812	OPAPEB			2.74753	3.72517	NIRDOI
2.94896	4.93965	HUTTIA		3.89395	4.30346	QUPDEL						3.33062	3.71237	POXHUG			2.75116	4.37576	MIYHAE
2.95224	5.07016	FIHLOZ		3.92719	5.62914	PUWCUF						3.33595	4.91078	NAMZIL			2.75514	4.81582	LOJNAA
2.95239	5.29963	CAWGAJ		3.93851	4.83999	EVUQUI						3.33782	4.01335	PURQEZ			2.75795	4.05316	CAKYEU
2.95777	4.44531	VOTMAS		3.95127	9.77148	KANMIX						3.33867	4.96253	ZEDHIB			2.75862	3.2844	FASJAL
2.95907	3.89004	CAZFOA		3.95166	5.38184	NIHBIQ02						3.3401	4.51899	TUWPIL			2.75887	3.55956	LICSUM
2.96961	4.26653	XADFAL		3.97854	5.12362	BEPVOJ01						3.34073	4.72292	OHAQEU			2.76098	3.95804	EBIPIQ
2.9714	5.59809	KAVRIK		3.99192	4.93073	EYULOA						3.34235	3.72234	HUCLIB			2.76215	4.38482	ZETQAS
2.97433	5.39588	HAKCIG		4.00559	5.12851	RUWWUC						3.34321	4.79706	UVAROZ			2.7632	5.80705	CITXUZ
2.97646	4.4794	IDUDES		4.0299	5.17293	RUWXAJ						3.35688	5.45758	TEDSIG			2.7668	3.18076	CESYEF01
2.97964	5.66244	OTAXOX		4.03008	6.88886	YEHGID						3.36041	4.89962	NICJUG			2.76994	3.40131	CDLGLU10
2.98032	4.66198	LOQSUG		4.03616	4.67624	YARBUQ						3.36186	4.72699	UVARUF			2.7709	4.82166	MICNIW
2.98396	12.7414	EJEHAD		4.08985	5.22962	KAVTUY						3.3625	4.24556	LULJAE			2.77166	3.9762	RUFMUA
2.99285	4.1969	WALBOC02		4.10291	4.99697	LAGHIL						3.37464	4.90625	LALPOF			2.77205	4.73091	CUNXIS10
2.99465	4.25337	XUZDUS		4.10534	5.16354	LUKRIS						3.38182	4.6023	LECGEH			2.77205	4.73091	CUNXIS
2.9953	4.21583	WALBOC01		4.14932	5.34764	MAHTAR01						3.3869	4.24244	EJIDUW01			2.77473	4.3933	ZETPUL
2.99752	3.8372	EXUMOZ		4.20957	5.35735	QOMFAA						3.38887	4.78127	YARKAF			2.77559	5.20555	NERVOV
2.99898	5.11237	AQETUM		4.2277	6.92906	HEFDED						3.40377	5.22361	HELDEJ			2.77756	4.01951	ROJNEJ
2.99963	3.66828	XIMPOA		4.25829	5.05781	CUMDIY						3.42101	4.81526	BOCKOT			2.77879	4.04164	CAHSOU
3.00159	4.00683	ECOROD		4.27142	4.70734	CUKXOW						3.42336	4.10218	BENXUP			2.78001	5.64584	ROSCEH
3.00568	4.25157	AFOQUI		4.28733	15.3296	KUCDIW						3.42553	4.3604	ERUFUS			2.7809	4.77494	HEDTER
3.00875	6.35432	YEYYAC		4.2994	7.86111	AXUBOL						3.42715	4.8082	DEFRIR			2.78115	5.3179	GIZJOP
3.00948	12.1705	XALTOV										3.43131	5.63987	HOXKIP			2.7831	4.5778	GIHBII
3.01348	4.80212	VONBIK										3.4331	4.86939	UJEDIX			2.78322	4.08997	CAKYAQ
3.02039	5.85437	EXOZEX										3.43363	5.67349	LEZLAF			2.78544	3.80978	VAQLAC
3.02065	4.59038	GEVKID										3.43426	5.03956	HOWQEQ			2.78558	3.01628	SADMIV
3.02702	4.97615	KIFXOO										3.43605	4.28482	XENMIO			2.7861	3.87598	XUWVEQ
3.02862	4.89851	QARTAG										3.43707	4.50079	WANJIF			2.78811	3.93149	ECOSIY
3.03358	3.5787	PEJRON										3.43732	4.67684	BIMDEF			2.78834	3.73773	YOPMAS
3.03382	4.09843	BONNIC										3.43855	4.51272	MABJOP			2.79051	3.00083	GUSNEN01
3.03659	3.90772	ECORIX										3.44252	4.21553	GUFREF			2.7932	4.1516	DAWWIJ
3.03689	7.07279	XIPBOO										3.44834	5.79435	QEJYIP			2.79398	5.58826	QIFLIC
3.03904	5.13227	FASQUN										3.45067	4.09249	GEPDEM			2.79467	5.16319	VEFLUP
3.04516	4.17085	FECWOB01										3.45605	6.31603	PEMRIK			2.79544	4.05573	NASCIV
3.04724	4.15939	XAPYAO										3.46007	4.37268	OFUCAV			2.79775	4.11875	CAKXOD
3.04859	4.32056	KIFKAM										3.46231	5.04832	QUQGEP			2.79989	4.72338	KEXKEF
3.04881	7.07022	TAKYOV										3.46915	4.9958	XEDLUN01			2.80032	5.0932	JEJKEP
3.04904	4.53955	FIGXAW										3.47065	4.67098	VIPZAX			2.80345	3.78	RAXDAX
3.05086	7.13438	DUGBAJ										3.47068	4.29138	VURYIR			2.8039	5.15858	OKIPOO
3.05498	4.24107	BAKGAX										3.47503	5.05189	DAWDAI			2.80454	4.11931	PUQHIT
3.05989	7.14256	ILUHIH										3.47722	4.31831	JOSNAG			2.80491	3.94229	GUJVIR
3.06586	7.10596	ILUFOL										3.47964	6.93106	NEVJEF			2.8069	7.44304	ICANEH
3.06783	4.48241	UTUMAY										3.48033	4.66636	YARDEC			2.80803	4.97103	ESIPUR
3.07068	7.1541	ILUGOM										3.4822	16.8285	DIBQEM			2.80806	3.68992	KAFYAT
3.07343	11.4137	GITTOT										3.48356	4.73557	ESATAU			2.80911	3.35506	PELNEA01
3.07382	5.26427	GIFSOF										3.48582	5.31956	HGCNCO			2.81125	4.6846	DEJCEB
3.07417	3.76455	TETWOG										3.48673	4.44828	PURSOK			2.81232	4.522	POVXII
3.07523	4.22225	WALCET										3.48794	4.34391	JOSNAG01			2.81383	3.85934	UJAQAY
3.0854	7.15398	DUFZOU										3.49442	4.41225	IDUDIW			2.81425	3.70645	ZEDRAD
3.08881	3.45598	FEJKEM										3.50712	5.93335	TISGUY			2.81637	4.40281	OVIDON
3.08988	4.39679	LIRTEM										3.51213	5.20728	BIMDIL			2.81655	4.9703	ESIPUR02
3.09029	7.0969	ILUHON										3.51292	5.03615	XEDLUN			2.81759	4.13408	CAKXIX
3.09037	5.07523	UBOGAV										3.52102	4.49598	HIWKII			2.81869	4.92925	TETWUM
3.09218	7.09777	ILUFIF										3.52352	4.68805	KOMGUP			2.82759	5.10514	OKIQAB
3.09524	4.05561	LEMNOH										3.52421	5.11492	REDROI			2.82776	4.14523	CAKXET
3.09799	5.07769	INURIS										3.52606	5.27812	WEVZUT			2.82848	8.97123	IDORIE
3.10209	11.4006	GITTOT01										3.53239	4.67398	TIFBOA			2.8294	3.74512	REYCEF
3.10347	12.7414	AWAHAI										3.53484	4.62568	YARDIG			2.83052	3.63337	HOJLEY
3.10602	4.9886	NIVNOW										3.53509	4.98549	SIWGUB			2.83389	3.4806	VIGRIO
3.10979	4.51219	XOVVIO										3.53873	5.20547	KIFWUT			2.83423	4.30719	KOMHAW
3.11001	4.82685	KEQZAJ										3.53933	4.76954	CEGFAW			2.83449	3.89192	QALNIA
3.11475	7.24143	CEFLEF										3.5394	5.27377	DAGDUL			2.83611	4.02535	HARNAR
3.11785	5.11559	PEGPUO										3.53974	6.87946	ALURIJ			2.83674	4.1572	PASNEE
3.11961	7.17076	DUFZUA										3.54046	4.90808	EPOXAJ			2.83675	3.1244	FEXHOG01
3.12691	11.4294	OFERUN02										3.5414	4.46949	UJAQEC			2.83679	3.6186	OKILIE
3.12698	7.08036	TAKYEL										3.54145	4.40066	QERZUI01			2.83696	4.533	PASKAX
3.1306	4.87192	GAXGIX										3.54235	5.26498	KIDDIM			2.83702	4.16556	IPOWOA
3.13122	7.09377	ILUJEF										3.54341	4.04228	YECQUS02			2.83796	5.54039	KAVREG
3.13265	5.17553	XOQXEH										3.54467	5.451	UVUFUN			2.84337	3.99789	COXQUB
3.14023	4.80314	LOQSOA										3.54471	4.56897	TEVZOK			2.84597	5.16363	GAGXAP
3.1424	7.2202	FAHTUE										3.54704	4.56807	NIKYOW			2.84828	4.14327	JODGEP
3.14287	5.75147	GAWKEW										3.54705	5.06566	REHMEY			2.84987	4.0642	EJEFOP
3.14826	4.457	IZEHAX										3.54798	4.30666	WEFZIS			2.85009	4.96921	WAHREE
3.14901	7.2437	TUVDOD										3.54871	5.33632	ECODEG			2.85025	3.84897	NUXMAU
3.15163	6.14808	CERMIV										3.55595	15.3542	RULXOM			2.85255	4.85681	COYTUG01
3.15287	4.75634	CAWZUX										3.56035	4.11746	QUQHAM			2.85269	7.85146	GEGSIW
3.15291	5.14547	PEGQAV										3.56044	5.13597	WAZQIZ			2.8532	4.61324	ITIBET
3.15351	7.30526	TUVDUJ										3.56279	4.2412	XAVQIU			2.85433	4.75314	MIHBAG
3.15378	7.16071	ILUJIJ										3.56541	8.67616	FIMNIA			2.85499	3.40713	CDLGLU12
3.15608	5.02349	NIVNUC										3.56624	4.42187	YUSGOJ			2.85573	6.56223	MECLEL
3.1609	5.02471	WOHZAU										3.56706	4.56718	PIGXUZ			2.858	5.05755	IJEXUR
3.16246	4.61914	WEDXAG										3.56751	5.08255	ZEDROR			2.85919	15.9326	MIHHER
3.16505	5.57227	RIPTAM										3.57011	5.09262	UHAXUW			2.86096	4.20107	EXIDEV
3.16573	7.09224	XIPBII										3.57221	5.46311	PUMNOB			2.86382	3.16551	XUNJIA
3.16702	5.07598	NAPFUG										3.57476	6.43529	NEGMUI			2.86447	4.15649	XADFEP
3.16913	3.95649	REYCOP										3.57802	4.3281	POLNAG			2.86477	3.71564	TEBCEK
3.17117	4.22629	WIDZOA										3.57853	4.12173	XEJXER			2.8656	3.57107	ECUCUB
3.17172	5.0633	JEMNAR										3.57912	5.32891	ZIDVAL			2.86572	4.01882	VODPOU
3.17193	3.71093	RUJGOT										3.58217	4.91899	YARYOF			2.86814	4.38076	WEMHED
3.17302	6.21547	EZUCOS										3.58405	4.61161	NIKYOW01			2.86998	4.23931	PUQHEP
3.17471	3.99498	OJAKUG										3.58422	4.56098	NIKZAJ			2.87014	5.00686	TAFCIO
3.17525	3.41912	IYIGEC										3.59011	4.38053	LEGGEK			2.87105	4.53798	PEFTAX
3.17899	5.23484	QUFGIH										3.59275	4.42914	PEGBAG			2.87136	5.56636	KAVROQ
3.17954	5.44742	GEGWAS										3.59297	3.9737	IZEBEV			2.87211	3.68436	JOJLOK
3.18083	3.59235	EBANAY										3.59386	4.99931	NUVYOT			2.87682	6.41127	XAGCUE
3.18264	3.75861	OPENIH										3.59683	4.97233	QIFLUO			2.87726	4.99341	FIGQUJ
3.18631	11.3903	EWIDUK										3.60148	4.66693	MOGXUB			2.87742	3.81372	MAKSUO
3.18681	4.05966	SEYFEI										3.60442	4.44167	EJONOH			2.87904	4.91214	OKIPUU
3.19439	3.76144	TEJQAC										3.60578	8.51371	XALDIY			2.87906	4.66531	QARTEK
3.19827	3.95151	QUVDOB										3.60905	5.16992	TECTUS			2.87938	4.38811	PEFSEA
3.19935	4.70961	ZETMOC										3.61738	4.26001	IFOSIG			2.88021	4.40845	NABNUA
3.19958	7.14322	ILUJAB										3.62411	4.09039	ECASAD			2.88315	3.28814	CESYEF
3.20042	5.60133	SAKDEP										3.62649	4.6258	FIQYUA			2.88357	3.2446	ECASOS
3.20053	3.97696	QUVFAP										3.62922	4.76391	TESGOO			2.88368	3.82744	XOVYUD
3.20383	4.6588	UMUTUS										3.63805	4.99995	PEVXAQ			2.88546	8.78202	HOWQOA
3.20421	7.31279	FAHVAM										3.63905	4.71712	MABJUV01			2.88696	3.93702	MAYXUG
3.20702	6.0679	GIHPAQ										3.64308	5.56033	CEXHET			2.88893	4.2216	QUKYUR
3.20781	4.2283	EKARUE										3.6453	4.79304	UFOFIF			2.89067	4.31995	QUKYOL
3.2085	5.19955	MAJHOW										3.64691	5.35554	FAQGEL			2.89089	6.44441	BAKLIK
3.21073	7.11344	ILUHUT										3.64755	4.94973	LAZGOK			2.89336	4.14903	UFUNAK
3.21232	7.26897	TUVDIX										3.64857	4.39424	NURMUJ			2.89993	4.27619	RURQEB
3.21457	15.4507	MIHHAN										3.64959	4.16883	ZARTAP03			2.90353	4.78685	VONBUW
3.21676	4.21344	QATRAG										3.64983	5.42515	MEWNEH			2.90368	4.80366	BIHMUC
3.21738	6.31221	HURQUG										3.65124	4.61976	PELGOE			2.90369	3.58332	NELWIL
3.21821	4.98547	MIHHOA										3.6521	4.84681	TEVZUQ			2.90391	4.0118	KIQKOK
3.22254	5.3671	MIJYEK										3.6533	5.65697	INAMUG			2.90422	5.45393	ZAVMIU
3.2242	4.0229	PEXBIF										3.65645	6.20454	KENJEU			2.90436	4.61538	XEJTIR
3.22691	4.89948	TAFBIN										3.65701	4.90975	NIFTIH			2.90765	3.88622	XUYDIF
3.22962	5.78381	YASNAJ										3.65899	4.72303	FIQYOU			2.90945	3.62257	OXAMIK
3.22991	7.04533	OCIVIH										3.65928	4.72499	NAXVOY03			2.91097	15.2984	MIHHIV
3.2345	5.77948	VAHSIH										3.66059	4.12479	LIWXIZ			2.91526	4.46543	VAJTUX
3.23821	4.46512	LABGAY										3.66339	14.4705	SETPEO			2.91754	6.68004	IBOTAU
3.24345	7.46813	EVEGER										3.6646	4.41588	SISFEH			2.92231	4.11681	RUFMUA01
3.24941	6.26428	DOTWAL										3.66815	4.04002	LUKREO			2.92426	4.11167	KOBPIB
3.2556	6.17066	VARREL										3.67074	5.89375	EBATUY			2.92557	4.7556	HEDCEA
3.25846	4.91468	ENUCOG										3.67142	6.60468	HUYJOA			2.93078	3.62654	DAHWAM
3.25891	5.17903	EHUCOA										3.67388	5.0058	NEHNEV01			2.93141	3.70731	BONWIL
3.26125	4.89022	EPUXET										3.67608	4.72309	MABJUV			2.93207	3.68471	LUWYUY
3.26381	11.3269	FAWCEN										3.6773	4.83126	FERVIJ			2.93224	4.86988	COYTUG
3.2656	6.075	VARRIP										3.68155	5.17696	OGAGIN			2.93292	5.75047	MAZJEC
3.26577	4.11749	FIRVEH										3.68365	4.6133	RAVVOA			2.93792	7.03145	ILUGAY
3.26956	4.54615	LEDPIU										3.68809	4.43579	FIPXEJ			2.93857	3.45164	PEKKAS
3.27438	4.58935	HEKTUO										3.68876	4.62363	ZURQOS			2.93929	3.81217	GURZID
3.28007	5.01094	COYVAO										3.69157	5.75252	MAJHUC			2.94018	3.40814	NHBZZN10
3.28293	4.73161	MOGYAI										3.69787	4.19243	WECFAN01			2.94053	4.48463	PIGXAF
3.28691	6.11466	YEZKOF										3.69918	4.42221	WODFOL			2.9425	5.84732	MAZJAY
3.28751	6.0987	GIHPEU										3.70386	6.00734	TEQPAI			2.94252	3.49905	HEDGUS
3.28831	4.44677	CETVAA										3.70783	4.81739	FATKES			2.94614	4.99199	PURRIE
3.2968	4.9916	VOCNOQ										3.70955	4.39273	OPIWEQ			2.9479	3.51375	FOHCAH
3.29973	5.15935	MIHHUG										3.70971	4.64581	YANBAR01			2.94858	4.04292	OVIZUP
3.30498	7.12956	NANMEW										3.71196	5.30496	FAQGIP			2.94879	3.32747	FIHXUR
3.30813	7.31541	ZEGSUB										3.71228	4.70586	OVIWIA			2.94896	4.93965	HUTTIA
3.31132	4.60365	JIQVAH										3.71255	4.06328	PAMVEG			2.95204	5.12907	MICPEU
3.31267	4.23207	UMUTOM										3.71285	5.15837	YUZXAT			2.95224	5.07016	FIHLOZ
3.32439	4.50777	DEYXIQ										3.7145	4.92999	FATKIW			2.95239	5.29963	CAWGAJ
3.32799	4.67652	QEZZIF										3.71458	5.12124	UVEVEX			2.95361	3.91786	UFUTIY
3.32854	4.5587	XOVVEK										3.71515	4.4966	YUSGID			2.95571	6.20375	TISKOW
3.32888	11.3331	FAWCEN01										3.71625	5.88567	AVUDAX			2.95777	4.44531	VOTMAS
3.32925	4.48211	ISACIP										3.71651	4.52799	NOFHUM			2.95812	3.94719	KIYMAI
3.33216	4.52354	DIBPIP										3.71719	6.8305	ALUREF			2.95907	3.89004	CAZFOA
3.33609	5.7806	UBACOR										3.72004	4.92982	EDAFUM			2.9644	4.17363	WALBOC
3.34196	5.88797	YEZKIZ										3.72114	5.34194	CEZFIY			2.9646	5.82793	DOKHOB
3.34297	5.41641	ZIGWUJ										3.72632	16.8958	NIGNUO			2.96848	3.67281	UGEPEB01
3.35645	3.68475	GUPJEG01										3.72665	5.02709	QUPHUF			2.96877	3.58458	RUBHUS
3.35735	4.13308	NUCREJ										3.72721	4.44057	BUSQIQ			2.96952	3.91448	HAZGOF05
3.36787	5.68593	IQIPAZ										3.73291	6.8318	ALURAB			2.96961	4.26653	XADFAL
3.37132	4.13561	OJAKOA										3.74089	4.83947	HAWZEM			2.97127	3.675	GUXQAR
3.37897	3.8382	COYTEQ										3.74741	8.13146	DEZKAW			2.9714	5.59809	KAVRIK
3.3801	4.03684	BEKSAM										3.7517	4.57628	KINJUO			2.97152	3.91146	HAZGOF04
3.38176	4.23486	OPENON										3.75233	5.22809	EZABEN			2.97363	3.13727	NIRDEX
3.38284	4.86365	GAWJEV										3.75921	4.77527	PIXPET			2.97433	5.39588	HAKCIG
3.38382	4.72647	UXEQOE										3.75922	3.95338	XUWVUG			2.97561	3.55675	QUGNOV
3.38698	4.52682	MAPFOY										3.76296	4.81469	MUTVUT			2.97646	4.4794	IDUDES
3.38841	3.71266	GUPJEG										3.76454	7.25417	ICALUV			2.97954	4.33819	HENYUV
3.39477	7.02539	EBUFUE										3.76528	4.42025	GIRDUI			2.97964	5.66244	OTAXOX
3.39858	5.06465	NUVYIN										3.76529	4.54337	KINHAS			2.97979	4.58385	NISCOJ
3.40962	11.4629	OFERUN03										3.76819	5.12579	KAXQIL			2.98032	4.66198	LOQSUG
3.41599	4.33773	WOHBIF										3.76823	4.60111	MURCAD			2.9815	3.71353	SETWUL
3.41671	4.33403	WOCVUG01										3.77014	4.29451	PESTUD			2.98231	3.8697	HAZGOF07
3.43415	5.97739	YEZKEV										3.77167	6.50134	FEWWOV			2.98365	3.9069	HAZGOF08
3.43767	4.25489	PEGBEK01										3.77257	5.49131	IXUREZ			2.98396	12.7414	EJEHAD
3.44241	4.24178	PEGBUA										3.77259	5.9525	GACPUX			2.98497	3.90842	HAZGOF06
3.44691	11.4225	FAWCEN02										3.77404	5.67304	IFEYIB			2.98646	3.58495	UGEPEB
3.44702	5.0065	DATPIY										3.77441	4.70366	UZATAR			2.98662	3.98401	IVARUT
3.45083	5.09989	RASXEP01										3.77757	4.74057	TEJGAS			2.98909	3.60944	YEGTAG
3.45218	5.06893	PEGQOJ										3.77935	5.14211	PEHQID			2.99139	3.92084	HAZGOF03
3.45438	5.87742	HAJLEK										3.78027	4.98345	DEJRUH			2.99216	4.95326	MICPAQ
3.45461	5.23981	EKEQIV										3.7803	5.45253	WOLMUG			2.99285	4.1969	WALBOC02
3.45863	4.7478	XOKHIP										3.78187	5.9241	ESEQUO			2.99426	3.96623	DEHBIC
3.46018	5.05756	PEGQID										3.7824	4.22955	HEFVAR			2.99465	4.25337	XUZDUS
3.46452	5.27714	YUJNOH										3.78362	4.05397	KEGYAX			2.99503	5.60217	UNEBIZ
3.47331	5.03643	WEMCIC										3.78414	4.79715	GIQYAH			2.9953	4.21583	WALBOC01
3.4738	5.02071	KAVKIC										3.78761	4.73813	FIFPAM01			2.99752	3.8372	EXUMOZ
3.48688	5.02432	WEMDAV										3.79148	5.77631	KULRIT			2.99898	5.11237	AQETUM
3.49069	4.99244	PEGQUP										3.79229	4.92972	ATIBUA			2.99921	4.92418	UVEWIC01
3.49285	3.78989	CODFEH										3.79569	5.90298	CETJAN			2.99963	3.66828	XIMPOA
3.50634	5.67142	FULQOT										3.79593	4.5789	CUIMDZ01			3.0014	3.97321	HAZGOF
3.50951	4.19945	REYBAA										3.79831	4.9541	YANBAR			3.00159	4.00683	ECOROD
3.51139	5.08501	RASXIT										3.80022	4.69642	KONYOB			3.00485	4.41466	HESVOR
3.51824	5.88281	HAJLIO										3.80073	4.65952	TEJGEW			3.00568	4.25157	AFOQUI
3.5289	5.886	HAJLOU										3.80435	4.81263	HIBGIJ			3.00678	3.57551	HAJJAE
3.53475	4.43687	LEVYOC										3.80459	4.83007	PASNAA01			3.00737	3.73148	YEGYIU
3.53796	5.83456	OGUPIQ										3.80534	5.63501	GAXDIS10			3.00777	6.35613	GAXWAF
3.53855	6.1178	NAQLAT										3.8062	4.97187	ZILBED			3.00875	6.35432	YEYYAC
3.55963	4.41751	PEGCAH										3.80654	5.28786	KUNWEW			3.00882	3.98213	GATHAL
3.56283	4.37067	WOCVUG										3.80831	4.77526	NACVUI			3.00948	12.1705	XALTOV
3.56551	8.36948	LOFZUB										3.80909	4.65609	FATKAO			3.01348	4.80212	VONBIK
3.5825	4.2229	YUGZEG										3.81154	4.91554	LUPTAS			3.01821	4.8567	COYVES01
3.58603	5.2876	KETHEY										3.81164	8.77917	XALCUJ			3.02039	5.85437	EXOZEX
3.59787	5.93833	HAJLUA										3.81301	4.31723	WUCRUH			3.02065	4.59038	GEVKID
3.61253	4.25979	QOXNIB										3.8135	5.18429	LEGGIO			3.02112	3.80992	SETXAS
3.62057	4.36505	PIHNUQ										3.81392	4.81089	GIQXOU			3.02184	3.88897	HAZGOF01
3.62145	5.7329	OVEXOD										3.81582	10.1359	GEDDEA			3.02702	4.97615	KIFXOO
3.62462	5.95786	HAJMEL										3.81788	4.66467	KUQXIE			3.02862	4.89851	QARTAG
3.63869	4.98722	ELIJUF										3.818	4.40498	RUCGOM			3.03297	4.70614	HEBTAL
3.66982	4.98078	ELILER										3.82141	5.05464	CUYYEB			3.03358	3.5787	PEJRON
3.69174	4.95628	ELILAN										3.82141	5.20561	FIPWOS			3.03382	4.09843	BONNIC
3.7268	4.95561	ELIKUG										3.82431	4.33176	ABIYIV			3.03435	4.16667	CAVSOJ
3.73339	4.97213	ELIKOA										3.826	4.89594	PASNAA			3.03502	3.86175	GIZVER
3.74838	4.14867	PAPXUB										3.82621	4.76638	MITGOL			3.03659	3.90772	ECORIX
3.7518	11.3187	KAMZUV										3.82793	4.64233	XEKMIL			3.03689	7.07279	XIPBOO
3.76828	5.28106	LEMVOP										3.82938	4.58192	HIYYEU			3.03737	4.22366	JEBDOK
3.77071	8.8329	XAKZAL										3.83005	4.89073	UVUPUX			3.03812	3.59982	YORZAH
3.77258	8.8251	XALDAQ										3.83278	5.63762	VEDGAO			3.03904	5.13227	FASQUN
3.78553	5.39661	WEBREC										3.83367	5.04944	CUYYAX			3.0429	3.1989	GUSNEN
3.79643	4.6785	DOKHIV										3.83845	4.34102	CODROD			3.04516	4.17085	FECWOB01
3.8044	5.13889	TETZID										3.83897	4.56325	DEYCAN			3.04724	4.15939	XAPYAO
3.80728	4.99766	ELIKEQ										3.84019	5.33017	ROGLOP			3.04753	5.06313	PETVER
3.80751	4.67375	GUSMAJ										3.84033	4.83068	PIXHOV			3.04859	4.32056	KIFKAM
3.82798	5.04335	ELIKAM										3.84058	4.95927	HURGUX01			3.04881	7.07022	TAKYOV
3.85268	5.0309	ELIJOZ										3.84254	4.97475	HURGUX			3.04904	4.53955	FIGXAW
3.87534	4.43901	CEGWER										3.84303	5.28042	SEJBAL			3.05086	7.13438	DUGBAJ
3.87743	4.44927	POKGEC										3.84472	4.74374	GUYLUI			3.05113	5.35488	VIZQEC
3.8895	5.5554	GUPBOJ01										3.84654	4.72449	FIFPAM			3.05212	3.70848	AGESIP
3.89017	4.60881	PEGCEL										3.84744	6.32378	DABWUA			3.05346	3.98906	ADABIS
3.89151	4.56016	VIPYOK										3.84764	4.64544	TEJGIA01			3.05406	3.99152	TIQGEG
3.90302	5.3362	HIWKEE										3.85233	16.0857	POBMOJ01			3.05498	4.24107	BAKGAX
3.92279	4.31905	KIBDEF										3.85266	4.38796	PEPKUR			3.05989	7.14256	ILUHIH
3.9269	4.70928	IXURAV										3.85295	5.84014	NUVWEH			3.06175	4.87211	COYVES
3.93064	4.58421	UDICAN										3.8555	5.12179	VEMTAJ01			3.06361	3.51407	TAXHUX
3.94029	4.71244	QEVKOS										3.85554	4.30865	QOKCID			3.06586	7.10596	ILUFOL
3.96344	5.40777	NAPFOA										3.85756	4.85877	GIQYUB			3.06783	4.48241	UTUMAY
3.96492	6.29701	UTEXIB										3.85843	5.24683	QAQSAD			3.07037	3.98024	TIQGEG01
3.97026	4.38921	OCUPOS										3.85894	5.17469	IPIDUH			3.07068	7.1541	ILUGOM
3.98305	5.31373	NAPFOA01										3.85926	6.07325	CAXXEG			3.07239	5.01317	GEFFUT
3.99776	5.38838	TEQVOC										3.86158	4.6267	WEMNAF			3.07343	11.4137	GITTOT
4.0077	6.27145	UTEXAT										3.86236	4.33279	UVINAP			3.07382	5.26427	GIFSOF
4.03658	5.48028	WOPDEL										3.86427	5.06012	UVEVAT			3.07417	3.76455	TETWOG
4.04819	4.6531	OCUPUY										3.86596	4.87431	PEDMER			3.07422	4.66454	ICIZOL
4.13773	5.34824	MAHTAR										3.86741	4.00169	FUWYAY			3.07523	4.22225	WALCET
4.14776	5.42928	ORAGEU										3.86749	8.72809	XALDOE			3.07582	6.10604	GAXVUY
4.18887	6.29319	TECVEE										3.86822	5.11483	BAHMAZ			3.07956	3.67442	OFUDUQ
4.24424	5.23174	ODOXEK										3.86855	4.89641	GIQXIO			3.08082	4.1309	WICQIJ
4.24987	6.23073	FISPIH										3.86869	4.89316	GIQXUA			3.08346	5.12422	SULKIU
												3.86932	5.05446	QITYOI			3.08502	4.2178	CAHNEF
												3.87145	5.21671	PASMUT			3.08506	5.69113	AXOHIE
												3.87203	5.63872	ISUCUV			3.0854	7.15398	DUFZOU
												3.87575	8.13442	KOCWEF			3.08683	4.35468	MOJJUR
												3.87767	4.92077	FERWAC			3.08881	3.45598	FEJKEM
												3.87823	5.4125	TOHZAS			3.08988	4.39679	LIRTEM
												3.87826	5.63541	XIHSEN			3.09029	7.0969	ILUHON
												3.8792	5.64298	XIHSEN01			3.09037	5.07523	UBOGAV
												3.88044	5.17721	HEBKEG			3.09218	7.09777	ILUFIF
												3.88146	4.78396	GUYLUI01			3.09221	3.89114	PENZUE
												3.88293	5.76478	LEVNOQ01			3.09275	3.74304	FUFREE
												3.88512	4.30909	KIBDIJ			3.0939	4.22766	QUPHIT
												3.88542	4.71415	KESHAT			3.09524	4.05561	LEMNOH
												3.88543	4.88713	ATIBAG			3.09799	5.07769	INURIS
												3.88578	4.84334	WEGGAS			3.09956	3.73735	RATVEP
												3.88626	6.17038	IXUQUO			3.10209	11.4006	GITTOT01
												3.88697	4.64383	PEJFOA			3.10287	4.59413	KOGJOG
												3.88956	15.3696	SENVIR			3.10347	12.7414	AWAHAI
												3.88968	5.25122	NIHBIQ			3.10602	4.9886	NIVNOW
												3.89074	4.90746	NEKBEL			3.10761	3.92715	YAZYEF
												3.89264	5.48014	JAVWUY			3.10979	4.51219	XOVVIO
												3.89295	4.86334	FEFZOF			3.11001	4.82685	KEQZAJ
												3.89316	6.4105	VAGTUU			3.11351	4.77902	WEHNAA
												3.89327	5.20085	ACOGAB			3.11475	7.24143	CEFLEF
												3.89416	5.7298	VEDFIV			3.11713	4.39579	FERVOP
												3.89763	5.00194	COXXIX			3.11785	5.11559	PEGPUO
												3.89845	4.90885	IKEBUV01			3.118	3.65608	DOHYIJ
												3.90104	4.69422	TONBOO			3.11952	5.18489	KAFTUI
												3.90242	5.11247	HIZQEN			3.11961	7.17076	DUFZUA
												3.90347	4.84062	XASFAY			3.12538	3.82629	PAZXUJ
												3.90414	4.37538	AFIPAH			3.12659	5.48857	EQOCES01
												3.90561	4.85962	WEGFUL			3.12691	11.4294	OFERUN02
												3.90629	4.48519	OSIXEU			3.12698	7.08036	TAKYEL
												3.90672	4.45237	WIWHUG			3.12705	4.87095	ECUDEM
												3.90724	5.56128	PAKXIK			3.1306	4.87192	GAXGIX
												3.90727	4.93593	GIQYIP			3.13122	7.09377	ILUJEF
												3.90767	5.34449	MABLAD			3.1317	4.97756	TIKMUW
												3.90797	4.71614	FATKUI			3.13265	5.17553	XOQXEH
												3.9125	4.92581	OGAGAF			3.13681	4.14606	RAQVEM
												3.91364	4.43355	ADIQEL			3.13696	4.21709	UFUMUD01
												3.91462	4.92775	WABTOK			3.13827	4.38344	BIVXEK
												3.91499	15.2534	RULXUS			3.13884	5.1388	QEKLID01
												3.91959	4.91458	JIXWUJ01			3.13948	3.49003	BOWQAG
												3.92013	4.78325	YUCZOM			3.14023	4.80314	LOQSOA
												3.92049	4.9438	ATICEL			3.14077	3.73047	CUYQIX
												3.92119	6.24493	NESSOV			3.1424	7.2202	FAHTUE
												3.92184	4.69665	ABEYIR			3.14287	5.75147	GAWKEW
												3.92264	4.90274	XOHFIK			3.14505	4.22555	PUWCOZ
												3.9231	4.91242	IJOMOJ06			3.14648	3.56239	CUYHIO
												3.93087	5.33307	MAZSUD			3.1465	4.32919	OYEBIE
												3.93215	4.79076	FIFNUE01			3.14651	4.9696	GAMTAQ
												3.93225	5.91307	LEVNOQ			3.14713	4.68881	DIMQOH
												3.93445	5.07778	JAVTAC			3.14826	4.457	IZEHAX
												3.9347	5.17871	KEJBOQ			3.14835	3.80785	MINCER
												3.93575	6.77398	YAHPED			3.14901	7.2437	TUVDOD
												3.93713	4.38967	FEWGUL			3.1503	5.52453	SAQZOB
												3.9389	5.02308	GIQXEK			3.15163	6.14808	CERMIV
												3.93912	4.45544	OSIXIY			3.15216	11.3713	FAWCEN03
												3.9398	6.39369	HASTAY			3.15287	4.75634	CAWZUX
												3.94054	4.94225	IJOMOJ07			3.15291	5.14547	PEGQAV
												3.94141	5.03811	RUWXEN			3.15333	3.95096	PEVZAT
												3.94171	4.84924	XEDPIH			3.15351	7.30526	TUVDUJ
												3.94305	7.44579	YONNUL			3.15373	5.12126	QEKLID
												3.94356	4.70447	ABEYEN			3.15378	7.16071	ILUJIJ
												3.94412	4.94612	IJOMOJ02			3.15385	4.75617	UVASAM
												3.94641	5.04398	YARSAN			3.15399	3.70221	RUBHOM
												3.94718	5.04407	XISVUR			3.15608	5.02349	NIVNUC
												3.94728	5.29628	DEPXAY			3.1608	4.83288	TACJIS
												3.9493	4.49557	XEQGEH			3.1609	5.02471	WOHZAU
												3.94966	4.69705	OBUFIB			3.16246	4.61914	WEDXAG
												3.95099	5.41082	HOGSIG			3.16468	3.95311	GUQTOB
												3.95118	4.8017	FIFNUE			3.16505	5.57227	RIPTAM
												3.95303	4.75824	ATIBOU			3.16561	5.0417	QIDDAI02
												3.95603	5.04966	GIQYEL			3.16573	7.09224	XIPBII
												3.95608	5.40162	IMISED			3.16629	3.32714	NAXKOO01
												3.95686	5.01507	VULKOD			3.16651	4.21645	EMUYAM
												3.9573	5.81598	ZIKJOU			3.16702	5.07598	NAPFUG
												3.95783	5.92543	VEDFER			3.16913	3.95649	REYCOP
												3.9585	4.67162	XAZGEK			3.17117	4.22629	WIDZOA
												3.95884	5.34498	ZASTUK			3.17172	5.0633	JEMNAR
												3.95909	5.10254	PEPBAO			3.17193	3.71093	RUJGOT
												3.96331	4.94277	IJOMOJ04			3.17302	6.21547	EZUCOS
												3.9654	4.84792	GUXJUF			3.17403	4.76443	UVARIT
												3.96607	5.99897	FIFMUD			3.17471	3.99498	OJAKUG
												3.96901	4.9428	JIXWUJ			3.17525	3.41912	IYIGEC
												3.97006	5.55428	NACYUM			3.17537	13.1275	EJEGOQ
												3.97085	13.7102	YEKQOW			3.17559	4.12508	ILOTOT
												3.9715	4.73097	ABEYAJ			3.17631	4.97155	XULCIR
												3.97323	4.99576	PIZPIX			3.17805	5.78061	KOJYEO
												3.97372	5.2478	ATICAH			3.1789	4.93461	ZIMJOW
												3.97477	4.95479	PIZPOD			3.17899	5.23484	QUFGIH
												3.97544	4.76594	LUFNEG			3.17954	5.44742	GEGWAS
												3.97904	4.67797	PORVUO			3.17956	5.01325	ZEZPOL
												3.98136	6.27753	NATXOW			3.18083	3.59235	EBANAY
												3.98198	7.18127	FAPVAV			3.18244	4.10943	QUQPUO
												3.98237	4.66793	UVEXAV			3.18264	3.75861	OPENIH
												3.98304	5.81645	NEJSEC			3.18308	3.61932	NATXIR
												3.98397	5.03658	CAZGIT			3.18473	5.34637	GIQZIQ
												3.98662	5.71977	PUMNIV			3.18487	3.8471	KILJEV
												3.9878	5.04878	GITWIQ			3.18631	11.3903	EWIDUK
												3.99796	4.52715	NADZEZ			3.18681	4.05966	SEYFEI
												4.00194	4.94209	YASLUA			3.1886	4.07915	RUSSAA
												4.00278	4.68317	DOYLIM			3.18862	3.93864	CECVOW
												4.00379	6.11234	RAYMAG			3.18904	3.84281	ICIZAV
												4.00719	5.98694	TOLGOR			3.19057	6.77675	HIYZEV01
												4.00789	6.12931	PIJJOI			3.19398	3.57848	YASPEP
												4.01037	4.88805	ECEZAO01			3.19439	3.76144	TEJQAC
												4.01341	5.16976	IQEWOQ			3.19633	4.01364	PEVYUM
												4.01377	4.79857	ECODIK			3.19787	4.04514	JOVDON
												4.01579	5.07535	NAKLIW			3.19827	3.95151	QUVDOB
												4.01588	4.65102	GIQYOV			3.19935	4.70961	ZETMOC
												4.0168	4.74458	ABEXUC			3.19958	7.14322	ILUJAB
												4.0179	4.60351	LUSJAL			3.20042	5.60133	SAKDEP
												4.01813	5.12784	ATIBOU01			3.20053	3.97696	QUVFAP
												4.02189	6.2924	XICYIT			3.20315	4.96917	GAMTEU
												4.02213	4.67742	KANCIN			3.20383	4.6588	UMUTUS
												4.02227	8.79809	VEHRIL			3.20421	7.31279	FAHVAM
												4.02408	6.70857	PEJRAZ			3.20462	3.94913	QUVDUH
												4.02417	5.64641	YARYEV			3.20599	4.35025	DAJHUS
												4.02438	5.16708	TIRLIQ			3.207	4.20642	BAHGUN02
												4.02471	4.93182	ATIBIO			3.20702	6.0679	GIHPAQ
												4.02529	4.62524	EQUBIC			3.20781	4.2283	EKARUE
												4.02699	5.10607	LAGNIS			3.2085	5.19955	MAJHOW
												4.02903	4.4965	ZERQOE			3.20855	4.79078	GEPDIQ
												4.0339	5.21362	FANQER			3.20856	3.94859	CECVIQ
												4.0341	5.07878	YARKEJ			3.2095	3.71518	UKUMAO01
												4.03476	4.28353	IBUYAH			3.21043	4.2322	XAXQEU
												4.03631	5.08695	VEDVUW			3.21073	3.80006	UKULOB01
												4.03769	4.98664	WIHVEP			3.21073	7.11344	ILUHUT
												4.03861	4.89575	UGAQEY			3.21135	5.1973	XINJAH
												4.03981	8.5056	CENJIQ			3.21232	7.26897	TUVDIX
												4.04434	4.50512	KAXQOR			3.21316	6.6717	XUCNOZ
												4.04573	4.96323	TADYII			3.21394	3.99432	LUKRUE
												4.04752	6.00946	RIXBEG			3.21457	9.73254	WUQRAC
												4.04921	4.7727	ABEXOW			3.21457	15.4507	MIHHAN
												4.05077	5.68269	TOKDON			3.21676	4.21344	QATRAG
												4.05137	4.71118	OSIWUJ			3.21738	6.31221	HURQUG
												4.0515	6.22728	ABIXOZ			3.21821	4.98547	MIHHOA
												4.05203	4.58396	OPIPOT			3.2197	3.82761	UKULOB
												4.05314	4.50507	JILXOS			3.2214	4.01646	LARZEL
												4.05507	5.20851	YEGKOM			3.2219	4.52583	FIHLUF
												4.05785	12.8102	LEVDIB			3.22254	5.3671	MIJYEK
												4.05857	5.42763	SERWAP			3.2242	4.0229	PEXBIF
												4.05893	6.19698	CENPUI			3.22631	4.22559	BAHGUN01
												4.06122	10.6609	UFIREI			3.22691	4.89948	TAFBIN
												4.06197	5.74941	NACYOG			3.22707	4.94226	UVEWIC
												4.06358	5.93858	VEDFOB			3.22734	5.22596	MICNES
												4.06488	4.94749	ECEZAO			3.22962	5.78381	YASNAJ
												4.06776	5.79435	SUGVUM			3.22991	7.04533	OCIVIH
												4.06866	4.98172	WIHVAL			3.23031	3.88653	HUSQES
												4.07005	6.23549	XICYEP			3.23056	3.76852	UKUMAO
												4.07127	5.3844	OVIZID			3.2345	5.77948	VAHSIH
												4.07167	5.22485	WECJAR			3.23579	4.31173	VIPXUO
												4.07807	4.77323	UGUGUZ			3.23595	5.06549	FUZKAN
												4.07874	6.01158	VEDFAN			3.23786	4.25391	NIRNAD
												4.08045	4.80529	ABEXIQ			3.23803	5.10703	GIFFEI
												4.08127	5.13294	PEXTUI			3.23821	4.46512	LABGAY
												4.08148	4.986	WICGEV			3.24345	7.46813	EVEGER
												4.08181	4.65057	VICDOC			3.24604	4.5216	REGLOG
												4.08202	6.52252	JEWCAP			3.24781	4.18118	AHUTIH01
												4.08598	5.25085	WOPWOO			3.24941	6.26428	DOTWAL
												4.08701	5.083	KINQAB			3.25151	4.17677	ODAJAG
												4.0897	4.90958	KIPZEQ			3.25219	4.09478	SEYDUW
												4.08974	4.44244	OKITAE			3.25348	3.48373	RUPZIM
												4.09417	4.678	EQUBUO			3.25406	4.46396	BEPVAV
												4.09997	4.64022	AFITEP			3.25534	6.19412	NOFQII
												4.10247	5.37007	UFATEA01			3.2556	6.17066	VARREL
												4.10343	13.4629	FEWWUB			3.25565	4.19765	CAVTAW
												4.10445	5.76724	ADAXEK			3.25577	5.12876	GIFFAE
												4.10454	6.90363	DUCGEO			3.2565	4.21795	IDAGUR
												4.10522	5.84738	ETESIG			3.25763	4.95313	COYVAO01
												4.10574	5.59823	HAFVOB			3.25846	4.91468	ENUCOG
												4.10578	4.61384	GIFKAH			3.25891	5.17903	EHUCOA
												4.1058	9.15829	PETWOC			3.25927	4.08097	LULHUW
												4.10631	6.32737	NAGQET			3.25933	4.25449	BAHGUN03
												4.10664	5.114	IBITUK			3.26113	4.00306	GIRGUL
												4.10989	5.15523	NAPZOV			3.26125	4.89022	EPUXET
												4.11027	4.77594	UGUHEK			3.26187	3.98887	ADABAK01
												4.11372	6.18049	GUWDUY			3.26381	11.3269	FAWCEN
												4.11701	4.98066	LALFUB			3.26537	4.21823	UFUMUD
												4.11847	4.70314	EQUBOI			3.2656	6.075	VARRIP
												4.11889	5.43641	ZEXKUK			3.26577	4.11749	FIRVEH
												4.12009	4.42418	DEYDOA			3.26666	4.83353	WASNOU
												4.12189	8.21931	CENKAJ			3.26762	4.19485	AHUTIH
												4.12193	5.72746	GIYSUD			3.26956	4.54615	LEDPIU
												4.12237	5.65756	TAGSEB			3.27438	4.58935	HEKTUO
												4.12403	5.91757	VEDGIW			3.28007	5.01094	COYVAO
												4.12997	5.91912	VEDGES			3.282	4.82667	DAPXEZ
												4.13348	5.17106	EFOTID			3.28233	4.10367	UQUHAQ
												4.137	4.67022	GAJZUO			3.28243	3.69182	POXHIU
												4.13818	5.45963	CUTKOS			3.28293	4.73161	MOGYAI
												4.1387	5.55826	LEZZEX			3.28559	4.77617	OPAPUR
												4.14038	4.96285	FOHCIP			3.28691	6.11466	YEZKOF
												4.14066	7.95891	HIFTOG			3.2871	5.83356	YEGTEK
												4.14091	6.01546	KASRAZ			3.28712	3.66162	BUSGIG
												4.14157	6.98334	YEYFEP			3.28751	6.0987	GIHPEU
												4.14331	4.82084	ABEXEM			3.28764	4.27373	BAHGUN04
												4.14383	5.43686	DEKHEH			3.28831	4.44677	CETVAA
												4.14792	6.04006	ENITIF			3.2937	3.7089	WONXIH
												4.14994	5.56488	LIDZOP			3.29458	4.79997	OPAPOL
												4.15044	4.90168	XECJUK			3.29583	3.77572	CEHWIX
												4.15104	7.88297	HIFTOG02			3.29667	4.75257	QOVGOY01
												4.15655	6.77563	QOPZIF			3.2968	4.9916	VOCNOQ
												4.15657	6.92899	OWETIU			3.29694	5.77464	WAZQUL
												4.15774	7.60733	FAPTOH			3.29845	3.6953	POXHOA
												4.15785	5.18747	IKOSOQ			3.29929	11.7128	HIFVUO01
												4.15949	4.41725	VASKOR			3.29973	5.15935	MIHHUG
												4.15979	4.98838	KEYYET			3.30187	4.19352	FOHSAW01
												4.1602	7.73235	OQANIE			3.30498	7.12956	NANMEW
												4.16072	5.40468	RIPNIP			3.30578	11.7415	IMIDZB10
												4.16271	5.05147	KINPUU			3.30607	4.13987	SEYFAE
												4.16375	4.69508	BUGSOM			3.30617	4.75346	QOVGOY
												4.16389	5.36071	MURTUO			3.30813	7.31541	ZEGSUB
												4.1656	5.96918	MUGFOK			3.30829	4.79448	LALPIZ
												4.16679	4.45514	GIFKIP			3.30941	4.32153	QERZUI
												4.16928	6.10817	DIBJIJ			3.30977	7.57165	TEBWII
												4.17048	4.59875	GOGWEF			3.31132	4.60365	JIQVAH
												4.17233	5.00847	MOSDUT			3.31267	4.23207	UMUTOM
												4.18132	4.79846	YEYBOV			3.31506	4.54949	ADABUE
												4.18269	4.74189	GAJZIC			3.31524	5.93538	SENWEP
												4.18275	4.72751	BUGSIG			3.31551	5.79634	WAZRAS
												4.18424	5.70734	HICVUM			3.31702	3.85878	BIBBUL
												4.18459	4.53887	NAGBUU			3.31743	4.03909	AMUCOB
												4.18591	5.79604	QOCRUW			3.32227	4.50011	AGUWUV
												4.18708	5.75366	UJOWEW			3.32278	3.72291	BUSGOM
												4.18996	6.86464	GUBVUU			3.32439	4.50777	DEYXIQ
												4.19082	4.72085	BUGSEC			3.32695	4.83812	OPAPEB
												4.19261	5.97035	QUQPIC			3.32777	3.73118	DOHYIJ01
												4.19271	5.40684	IKEVAW			3.32799	4.67652	QEZZIF
												4.1969	5.64744	BELTUJ			3.32854	4.5587	XOVVEK
												4.19849	4.88485	SOVHAM			3.32888	11.3331	FAWCEN01
												4.20147	7.12423	XICYAL			3.32925	4.48211	ISACIP
												4.20205	9.52723	KEVWUF			3.33062	3.71237	POXHUG
												4.20657	5.38643	OJIWAG			3.33216	4.52354	DIBPIP
												4.20671	5.55366	COBWEV			3.33595	4.91078	NAMZIL
												4.20706	6.32021	HOXKUB			3.33609	5.7806	UBACOR
												4.20794	5.44662	IKETUO			3.33782	4.01335	PURQEZ
												4.21047	6.57975	OFUYUL			3.33867	4.96253	ZEDHIB
												4.21189	5.10436	OYOSAX			3.3401	4.51899	TUWPIL
												4.21505	5.79442	QOCSAD			3.34073	4.72292	OHAQEU
												4.21783	5.39984	ILIGAL			3.34196	5.88797	YEZKIZ
												4.22304	6.03093	SAMLAV01			3.34235	3.72234	HUCLIB
												4.22337	5.40466	ILIGEP			3.34297	5.41641	ZIGWUJ
												4.22431	4.76043	GAJZOI			3.34321	4.79706	UVAROZ
												4.23271	4.90855	QADBII			3.3542	5.52712	AXUHIL
												4.23281	5.11458	ZEDQEG			3.35645	3.68475	GUPJEG01
												4.23311	5.47175	IKETOI			3.35688	5.45758	TEDSIG
												4.23558	5.14127	QIGBIR			3.35735	4.13308	NUCREJ
												4.23676	5.6172	RIFQUT			3.36041	4.89962	NICJUG
												4.23694	15.0227	WAVRAO			3.36062	5.26678	DOGZIJ
												4.2377	5.46375	YISFEL			3.36186	4.72699	UVARUF
												4.23883	8.98552	YIKJUZ			3.3625	4.24556	LULJAE
												4.24072	5.48661	IKETIC			3.36595	4.54965	MOYNEU
												4.24208	11.1016	UYAPOA			3.3664	5.32693	GOMRAC
												4.24356	6.04512	FIFMOX			3.36787	5.68593	IQIPAZ
												4.2442	5.57985	VICYUD			3.37132	4.13561	OJAKOA
												4.24661	6.31713	OVEJIJ			3.37252	5.9815	NETFAU
												4.2474	4.7784	FIPWUY			3.37464	4.90625	LALPOF
												4.25222	16.3645	QOWQUO			3.37897	3.8382	COYTEQ
												4.25333	5.08668	IBUDOZ			3.3801	4.03684	BEKSAM
												4.25341	5.56779	XOQXIL			3.38176	4.23486	OPENON
												4.25664	5.56472	XADDOX			3.38182	4.6023	LECGEH
												4.25857	6.30223	COYCEZ			3.38284	4.86365	GAWJEV
												4.25931	7.74379	MAGBAZ			3.38382	4.72647	UXEQOE
												4.26379	5.5138	IKETEY			3.3869	4.24244	EJIDUW01
												4.26508	6.76714	TANBOZ			3.38698	4.52682	MAPFOY
												4.26512	6.23359	IYUJAO			3.38841	3.71266	GUPJEG
												4.26793	4.92293	ISEQIH			3.38887	4.78127	YARKAF
												4.26843	7.50874	VARJEF			3.39477	7.02539	EBUFUE
												4.27158	6.83841	LADHEF			3.39668	3.98841	WASNIO
												4.27166	5.34617	BAEDTA01			3.39858	5.06465	NUVYIN
												4.27216	9.42427	AWAWUR			3.40268	7.27569	UBACUX
												4.27265	5.73732	QOMDUS			3.40377	5.22361	HELDEJ
												4.27369	4.83981	WEMCAU			3.40962	11.4629	OFERUN03
												4.27442	5.76369	TUCJAD			3.41599	4.33773	WOHBIF
												4.27554	7.85828	PIFPIE			3.41671	4.33403	WOCVUG01
												4.27878	5.92256	BELTOD			3.42101	4.81526	BOCKOT
												4.27878	6.07415	XAKQOR			3.42336	4.10218	BENXUP
												4.27938	6.06928	KIDVIE			3.42553	4.3604	ERUFUS
												4.27966	7.01256	REJLIC			3.42715	4.8082	DEFRIR
												4.28078	8.02011	OWAVOY			3.43131	5.63987	HOXKIP
												4.28089	6.80431	QIRYAS			3.4331	4.86939	UJEDIX
												4.28121	9.61156	EWALUK			3.43363	5.67349	LEZLAF
												4.28304	4.62483	PARMIG			3.43415	5.97739	YEZKEV
												4.28453	7.72002	PIDMEV01			3.43426	5.03956	HOWQEQ
												4.28533	4.71676	MIMVEJ			3.43471	3.8316	MIZKOW
												4.28663	4.85568	GAJYUN			3.43605	4.28482	XENMIO
												4.28704	4.9863	ZILBAZ			3.43707	4.50079	WANJIF
												4.28777	4.72075	FUTZOK			3.43732	4.67684	BIMDEF
												4.28777	4.80464	GAJZEY			3.43767	4.25489	PEGBEK01
												4.28799	6.28616	XINWUO			3.43855	4.51272	MABJOP
												4.28976	5.42171	FATLUJ			3.44165	5.2733	LACGED
												4.29241	4.96705	MABKEG			3.44241	4.24178	PEGBUA
												4.29344	5.70322	LESWAI			3.44252	4.21553	GUFREF
												4.29348	4.71891	CUKYAJ			3.44611	4.29825	XENMOU
												4.2951	6.69801	WIYZOU			3.44691	11.4225	FAWCEN02
												4.30122	4.60907	OHOMIH			3.44702	5.0065	DATPIY
																	3.44834	5.79435	QEJYIP
																	3.45067	4.09249	GEPDEM
																	3.45083	5.09989	RASXEP01
																	3.45218	5.06893	PEGQOJ
																	3.45438	5.87742	HAJLEK
																	3.45461	5.23981	EKEQIV
																	3.45605	6.31603	PEMRIK
																	3.45747	6.25588	QEZZOL
																	3.45753	4.34506	FOHQUO
																	3.45863	4.7478	XOKHIP
																	3.46007	4.37268	OFUCAV
																	3.46018	5.05756	PEGQID
																	3.46231	5.04832	QUQGEP
																	3.46452	5.27714	YUJNOH
																	3.46915	4.9958	XEDLUN01
																	3.46995	4.54882	NERTAH
																	3.47065	4.67098	VIPZAX
																	3.47068	4.29138	VURYIR
																	3.47181	3.78387	GIKQIC
																	3.47331	5.03643	WEMCIC
																	3.4738	5.02071	KAVKIC
																	3.47503	5.05189	DAWDAI
																	3.47614	4.27091	PEGBEK02
																	3.47722	4.31831	JOSNAG
																	3.47964	6.93106	NEVJEF
																	3.48033	4.66636	YARDEC
																	3.48109	5.41352	WIDZUG
																	3.4822	16.8285	DIBQEM
																	3.48306	4.51038	ITIBOD
																	3.48356	4.73557	ESATAU
																	3.48491	4.34072	XEJWUG
																	3.48582	5.31956	HGCNCO
																	3.48673	4.44828	PURSOK
																	3.48688	5.02432	WEMDAV
																	3.48794	4.34391	JOSNAG01
																	3.49069	4.99244	PEGQUP
																	3.49285	3.78989	CODFEH
																	3.49442	4.41225	IDUDIW
																	3.49743	4.25802	GULPIN
																	3.5005	3.83387	DORFOG
																	3.50634	5.67142	FULQOT
																	3.50712	5.93335	TISGUY
																	3.50951	4.19945	REYBAA
																	3.51016	4.82164	HADQUA
																	3.51033	6.91296	LEDLAJ
																	3.51139	5.08501	RASXIT
																	3.51213	5.20728	BIMDIL
																	3.51292	5.03615	XEDLUN
																	3.51548	4.67713	XOBXIW
																	3.51824	5.88281	HAJLIO
																	3.52102	4.49598	HIWKII
																	3.52297	4.59329	TEVZEA
																	3.52352	4.68805	KOMGUP
																	3.52421	5.11492	REDROI
																	3.52606	5.27812	WEVZUT
																	3.5289	5.886	HAJLOU
																	3.52892	5.01403	RIDGIW
																	3.53239	4.67398	TIFBOA
																	3.53409	4.59875	KILFUI
																	3.53475	4.43687	LEVYOC
																	3.53484	4.62568	YARDIG
																	3.53509	4.98549	SIWGUB
																	3.53796	5.83456	OGUPIQ
																	3.53855	6.1178	NAQLAT
																	3.53873	5.20547	KIFWUT
																	3.53933	4.76954	CEGFAW
																	3.5394	5.27377	DAGDUL
																	3.53974	6.87946	ALURIJ
																	3.54046	4.90808	EPOXAJ
																	3.5414	4.46949	UJAQEC
																	3.54145	4.40066	QERZUI01
																	3.54235	5.26498	KIDDIM
																	3.54341	4.04228	YECQUS02
																	3.54467	5.451	UVUFUN
																	3.54471	4.56897	TEVZOK
																	3.54585	4.85387	SOTTUR
																	3.54704	4.56807	NIKYOW
																	3.54705	5.06566	REHMEY
																	3.54798	4.30666	WEFZIS
																	3.54871	5.33632	ECODEG
																	3.55494	8.28708	XALDEU
																	3.55595	15.3542	RULXOM
																	3.55963	4.41751	PEGCAH
																	3.56035	4.11746	QUQHAM
																	3.56044	5.13597	WAZQIZ
																	3.5623	5.09454	WEMCEY
																	3.56279	4.2412	XAVQIU
																	3.56283	4.37067	WOCVUG
																	3.56541	8.67616	FIMNIA
																	3.56551	8.36948	LOFZUB
																	3.56624	4.42187	YUSGOJ
																	3.56706	4.56718	PIGXUZ
																	3.56751	5.08255	ZEDROR
																	3.5679	4.59869	RAVVIU01
																	3.57011	5.09262	UHAXUW
																	3.57221	5.46311	PUMNOB
																	3.57476	6.43529	NEGMUI
																	3.5768	4.57827	RAVVIU
																	3.57779	4.74887	EBEMII
																	3.57802	4.3281	POLNAG
																	3.57853	4.12173	XEJXER
																	3.57912	5.32891	ZIDVAL
																	3.58217	4.91899	YARYOF
																	3.5825	4.2229	YUGZEG
																	3.58268	4.82436	TESGUU
																	3.58405	4.61161	NIKYOW01
																	3.58422	4.56098	NIKZAJ
																	3.58603	5.2876	KETHEY
																	3.58733	6.53637	DAGDIZ
																	3.59008	7.2826	UQULAU
																	3.59011	4.38053	LEGGEK
																	3.59258	5.04252	YELYOE
																	3.59275	4.42914	PEGBAG
																	3.59297	3.9737	IZEBEV
																	3.59386	4.99931	NUVYOT
																	3.59662	6.33441	DICVES
																	3.59683	4.97233	QIFLUO
																	3.59787	5.93833	HAJLUA
																	3.60148	4.66693	MOGXUB
																	3.60442	4.44167	EJONOH
																	3.60567	4.27901	XEJXAN
																	3.60578	8.51371	XALDIY
																	3.60905	5.16992	TECTUS
																	3.60956	4.68206	HIBGEF
																	3.61253	4.25979	QOXNIB
																	3.61461	5.93426	QUPJAN
																	3.61538	4.60883	NIKZAJ01
																	3.61738	4.26001	IFOSIG
																	3.61774	4.82351	EBEMEE
																	3.62057	4.36505	PIHNUQ
																	3.62145	5.7329	OVEXOD
																	3.62215	4.66461	EDAGAT
																	3.62411	4.09039	ECASAD
																	3.62462	5.95786	HAJMEL
																	3.62649	4.6258	FIQYUA
																	3.62787	4.58202	APEBED
																	3.62922	4.76391	TESGOO
																	3.63147	4.66068	RATDAS02
																	3.63666	4.76348	XEHSOT
																	3.63805	4.99995	PEVXAQ
																	3.63869	4.98722	ELIJUF
																	3.63905	4.71712	MABJUV01
																	3.6396	5.3838	GOMREG
																	3.6399	5.70679	AVIMUO
																	3.64055	5.20142	DEYJOI
																	3.64059	4.89772	TEVZIE
																	3.64308	5.56033	CEXHET
																	3.64376	4.9018	NIKYUC
																	3.6453	4.79304	UFOFIF
																	3.64676	4.81303	XEHSIN
																	3.64691	5.35554	FAQGEL
																	3.64755	4.94973	LAZGOK
																	3.64857	4.39424	NURMUJ
																	3.64959	4.16883	ZARTAP03
																	3.64983	5.42515	MEWNEH
																	3.65124	4.61976	PELGOE
																	3.65202	4.70077	RAVVOA02
																	3.6521	4.84681	TEVZUQ
																	3.65221	4.78045	TEHRUU
																	3.6533	5.65697	INAMUG
																	3.65645	6.20454	KENJEU
																	3.65701	4.90975	NIFTIH
																	3.65894	4.63178	RAVVOA01
																	3.65899	4.72303	FIQYOU
																	3.65928	4.72499	NAXVOY03
																	3.65952	4.88747	XEHSAF
																	3.66059	4.12479	LIWXIZ
																	3.66075	4.99192	KAXQOR01
																	3.66332	4.82471	NIHBEM
																	3.66339	14.4705	SETPEO
																	3.6646	4.41588	SISFEH
																	3.6653	5.40502	DUYRAR
																	3.66815	4.04002	LUKREO
																	3.66818	5.04305	PELXIP
																	3.66982	4.98078	ELILER
																	3.67074	5.89375	EBATUY
																	3.67142	6.60468	HUYJOA
																	3.67275	4.89378	REJVOS
																	3.67388	5.0058	NEHNEV01
																	3.6752	4.69215	RATCUL01
																	3.67608	4.72309	MABJUV
																	3.6773	4.83126	FERVIJ
																	3.67769	4.75058	NAXVOY01
																	3.68126	4.76846	NAXVOY02
																	3.68155	5.17696	OGAGIN
																	3.68194	4.72463	NIKYOW02
																	3.68365	4.6133	RAVVOA
																	3.68372	4.87963	NIHBEM01
																	3.68791	4.94759	NIKYUC01
																	3.68809	4.43579	FIPXEJ
																	3.68876	4.62363	ZURQOS
																	3.68938	4.67382	NIKZAJ02
																	3.6902	5.27957	DUYRIZ
																	3.69066	4.90414	EDAGEX
																	3.69157	5.75252	MAJHUC
																	3.69174	4.95628	ELILAN
																	3.69522	5.24657	MODNIC
																	3.69787	4.19243	WECFAN01
																	3.69918	4.42221	WODFOL
																	3.69977	5.41837	DUYREV
																	3.70386	6.00734	TEQPAI
																	3.70751	4.82301	NIKZEN
																	3.70783	4.81739	FATKES
																	3.70955	4.39273	OPIWEQ
																	3.70971	4.64581	YANBAR01
																	3.71164	4.86464	NIKZEN01
																	3.71196	5.30496	FAQGIP
																	3.71228	4.70586	OVIWIA
																	3.71255	4.06328	PAMVEG
																	3.71285	5.15837	YUZXAT
																	3.7145	4.92999	FATKIW
																	3.71458	5.12124	UVEVEX
																	3.71515	4.4966	YUSGID
																	3.71625	5.88567	AVUDAX
																	3.71651	4.52799	NOFHUM
																	3.71719	6.8305	ALUREF
																	3.72004	4.92982	EDAFUM
																	3.72114	5.34194	CEZFIY
																	3.72632	16.8958	NIGNUO
																	3.72665	5.02709	QUPHUF
																	3.7268	4.95561	ELIKUG
																	3.72721	4.44057	BUSQIQ
																	3.72749	4.70959	RATCUL02
																	3.73257	4.50943	NEJSAY
																	3.73291	6.8318	ALURAB
																	3.73339	4.97213	ELIKOA
																	3.73403	5.10081	ACIBIY
																	3.7404	5.28773	BUSQEM
																	3.74089	4.83947	HAWZEM
																	3.74388	4.49986	KINKAV
																	3.74465	5.70035	RETBEZ
																	3.74741	8.13146	DEZKAW
																	3.74838	4.14867	PAPXUB
																	3.7517	4.57628	KINJUO
																	3.7518	11.3187	KAMZUV
																	3.75233	5.22809	EZABEN
																	3.75921	4.77527	PIXPET
																	3.75922	3.95338	XUWVUG
																	3.76296	4.81469	MUTVUT
																	3.76454	7.25417	ICALUV
																	3.76528	4.42025	GIRDUI
																	3.76529	4.54337	KINHAS
																	3.76819	5.12579	KAXQIL
																	3.76823	4.60111	MURCAD
																	3.76828	5.28106	LEMVOP
																	3.76853	5.12402	TEWFUY
																	3.77014	4.29451	PESTUD
																	3.77071	8.8329	XAKZAL
																	3.77167	6.50134	FEWWOV
																	3.77257	5.49131	IXUREZ
																	3.77258	8.8251	XALDAQ
																	3.77259	5.9525	GACPUX
																	3.77339	5.12552	LIDZUV
																	3.77404	5.67304	IFEYIB
																	3.77441	4.70366	UZATAR
																	3.77757	4.74057	TEJGAS
																	3.77935	5.14211	PEHQID
																	3.77956	5.30567	DUYROF
																	3.78027	4.98345	DEJRUH
																	3.7803	5.45253	WOLMUG
																	3.78187	5.9241	ESEQUO
																	3.78234	5.06856	NIKYUC02
																	3.7824	4.22955	HEFVAR
																	3.7831	4.74713	RATCUL03
																	3.78362	4.05397	KEGYAX
																	3.78414	4.79715	GIQYAH
																	3.78432	5.01891	NIHBEM02
																	3.78553	5.39661	WEBREC
																	3.78699	4.94738	NIKZEN02
																	3.78761	4.73813	FIFPAM01
																	3.78928	4.73753	XEHSUZ
																	3.79148	5.77631	KULRIT
																	3.79158	5.18714	DEYJIC
																	3.79229	4.92972	ATIBUA
																	3.79569	5.90298	CETJAN
																	3.79593	4.5789	CUIMDZ01
																	3.79614	4.80581	NEVVEQ
																	3.79643	4.6785	DOKHIV
																	3.79831	4.9541	YANBAR
																	3.80022	4.69642	KONYOB
																	3.80073	4.65952	TEJGEW
																	3.80264	5.71951	YIWMEW
																	3.80435	4.81263	HIBGIJ
																	3.8044	5.13889	TETZID
																	3.80459	4.83007	PASNAA01
																	3.80534	5.63501	GAXDIS10
																	3.8062	4.97187	ZILBED
																	3.80654	5.28786	KUNWEW
																	3.80728	4.99766	ELIKEQ
																	3.80751	4.67375	GUSMAJ
																	3.80831	4.77526	NACVUI
																	3.80909	4.65609	FATKAO
																	3.81153	5.76642	VAKBIU
																	3.81154	4.91554	LUPTAS
																	3.81164	8.77917	XALCUJ
																	3.81301	4.31723	WUCRUH
																	3.8135	5.18429	LEGGIO
																	3.81392	4.81089	GIQXOU
																	3.81582	10.1359	GEDDEA
																	3.81788	4.66467	KUQXIE
																	3.818	4.40498	RUCGOM
																	3.81876	4.76721	TUDQOZ
																	3.82141	5.05464	CUYYEB
																	3.82141	5.20561	FIPWOS
																	3.82431	4.33176	ABIYIV
																	3.826	4.89594	PASNAA
																	3.82621	4.76638	MITGOL
																	3.82793	4.64233	XEKMIL
																	3.82798	5.04335	ELIKAM
																	3.82938	4.58192	HIYYEU
																	3.83005	4.89073	UVUPUX
																	3.83278	5.63762	VEDGAO
																	3.83367	5.04944	CUYYAX
																	3.83478	4.91533	WENDIE
																	3.83765	4.9953	YANBAR02
																	3.83845	4.34102	CODROD
																	3.83897	4.56325	DEYCAN
																	3.84019	5.33017	ROGLOP
																	3.84033	4.83068	PIXHOV
																	3.84058	4.95927	HURGUX01
																	3.84254	4.97475	HURGUX
																	3.84303	5.28042	SEJBAL
																	3.8442	4.49857	DEGJIK
																	3.84472	4.74374	GUYLUI
																	3.84654	4.72449	FIFPAM
																	3.84744	6.32378	DABWUA
																	3.84764	4.64544	TEJGIA01
																	3.84842	4.48691	NARTIL
																	3.84947	5.24315	TESHAB
																	3.85188	5.24127	XEHSEJ
																	3.85233	16.0857	POBMOJ01
																	3.85266	4.38796	PEPKUR
																	3.85268	5.0309	ELIJOZ
																	3.85295	5.84014	NUVWEH
																	3.8555	5.12179	VEMTAJ01
																	3.85554	4.30865	QOKCID
																	3.85756	4.85877	GIQYUB
																	3.85843	5.24683	QAQSAD
																	3.85894	5.17469	IPIDUH
																	3.85906	4.62011	FIYDOH
																	3.85926	6.07325	CAXXEG
																	3.86158	4.6267	WEMNAF
																	3.86236	4.33279	UVINAP
																	3.86427	5.06012	UVEVAT
																	3.86596	4.87431	PEDMER
																	3.86694	4.94583	LIFWEE
																	3.86741	4.00169	FUWYAY
																	3.86749	8.72809	XALDOE
																	3.86822	5.11483	BAHMAZ
																	3.86855	4.89641	GIQXIO
																	3.86869	4.89316	GIQXUA
																	3.86932	5.05446	QITYOI
																	3.87145	5.21671	PASMUT
																	3.87203	5.63872	ISUCUV
																	3.87237	7.76134	YEZFIU
																	3.87534	4.43901	CEGWER
																	3.87575	8.13442	KOCWEF
																	3.87743	4.44927	POKGEC
																	3.87767	4.92077	FERWAC
																	3.87823	5.4125	TOHZAS
																	3.87826	5.63541	XIHSEN
																	3.8792	5.64298	XIHSEN01
																	3.88044	5.17721	HEBKEG
																	3.88146	4.78396	GUYLUI01
																	3.88293	5.76478	LEVNOQ01
																	3.88512	4.30909	KIBDIJ
																	3.88542	4.71415	KESHAT
																	3.88543	4.88713	ATIBAG
																	3.88578	4.84334	WEGGAS
																	3.88626	6.17038	IXUQUO
																	3.88697	4.64383	PEJFOA
																	3.8895	5.5554	GUPBOJ01
																	3.88956	15.3696	SENVIR
																	3.88968	5.25122	NIHBIQ
																	3.89017	4.60881	PEGCEL
																	3.8906	4.95206	NEYBEZ
																	3.89074	4.90746	NEKBEL
																	3.89151	4.56016	VIPYOK
																	3.89264	5.48014	JAVWUY
																	3.89271	5.30133	NIHBIQ01
																	3.89295	4.86334	FEFZOF
																	3.89316	6.4105	VAGTUU
																	3.89327	5.20085	ACOGAB
																	3.89395	4.30346	QUPDEL
																	3.89416	5.7298	VEDFIV
																	3.89763	5.00194	COXXIX
																	3.89845	4.90885	IKEBUV01
																	3.90104	4.69422	TONBOO
																	3.90242	5.11247	HIZQEN
																	3.90302	5.3362	HIWKEE
																	3.90347	4.84062	XASFAY
																	3.90414	4.37538	AFIPAH
																	3.90561	4.85962	WEGFUL
																	3.90629	4.48519	OSIXEU
																	3.90672	4.45237	WIWHUG
																	3.90724	5.56128	PAKXIK
																	3.90727	4.93593	GIQYIP
																	3.90767	5.34449	MABLAD
																	3.90797	4.71614	FATKUI
																	3.9125	4.92581	OGAGAF
																	3.91364	4.43355	ADIQEL
																	3.91462	4.92775	WABTOK
																	3.91499	15.2534	RULXUS
																	3.91959	4.91458	JIXWUJ01
																	3.92013	4.78325	YUCZOM
																	3.92049	4.9438	ATICEL
																	3.92119	6.24493	NESSOV
																	3.92184	4.69665	ABEYIR
																	3.92264	4.90274	XOHFIK
																	3.92279	4.31905	KIBDEF
																	3.9231	4.91242	IJOMOJ06
																	3.9269	4.70928	IXURAV
																	3.92719	5.62914	PUWCUF
																	3.93064	4.58421	UDICAN
																	3.93087	5.33307	MAZSUD
																	3.93215	4.79076	FIFNUE01
																	3.93225	5.91307	LEVNOQ
																	3.93445	5.07778	JAVTAC
																	3.9347	5.17871	KEJBOQ
																	3.93575	6.77398	YAHPED
																	3.93713	4.38967	FEWGUL
																	3.93851	4.83999	EVUQUI
																	3.9389	5.02308	GIQXEK
																	3.93912	4.45544	OSIXIY
																	3.9398	6.39369	HASTAY
																	3.94029	4.71244	QEVKOS
																	3.94054	4.94225	IJOMOJ07
																	3.94141	5.03811	RUWXEN
																	3.94171	4.84924	XEDPIH
																	3.94305	7.44579	YONNUL
																	3.94356	4.70447	ABEYEN
																	3.94412	4.94612	IJOMOJ02
																	3.94641	5.04398	YARSAN
																	3.94718	5.04407	XISVUR
																	3.94728	5.29628	DEPXAY
																	3.9493	4.49557	XEQGEH
																	3.94966	4.69705	OBUFIB
																	3.95099	5.41082	HOGSIG
																	3.95118	4.8017	FIFNUE
																	3.95127	9.77148	KANMIX
																	3.95166	5.38184	NIHBIQ02
																	3.95303	4.75824	ATIBOU
																	3.95603	5.04966	GIQYEL
																	3.95608	5.40162	IMISED
																	3.95686	5.01507	VULKOD
																	3.9573	5.81598	ZIKJOU
																	3.95783	5.92543	VEDFER
																	3.9585	4.67162	XAZGEK
																	3.95884	5.34498	ZASTUK
																	3.95909	5.10254	PEPBAO
																	3.96331	4.94277	IJOMOJ04
																	3.96344	5.40777	NAPFOA
																	3.96492	6.29701	UTEXIB
																	3.9654	4.84792	GUXJUF
																	3.96607	5.99897	FIFMUD
																	3.96901	4.9428	JIXWUJ
																	3.97006	5.55428	NACYUM
																	3.97026	4.38921	OCUPOS
																	3.97085	13.7102	YEKQOW
																	3.9715	4.73097	ABEYAJ
																	3.97323	4.99576	PIZPIX
																	3.97372	5.2478	ATICAH
																	3.97477	4.95479	PIZPOD
																	3.97544	4.76594	LUFNEG
																	3.97854	5.12362	BEPVOJ01
																	3.97904	4.67797	PORVUO
																	3.98136	6.27753	NATXOW
																	3.98198	7.18127	FAPVAV
																	3.98237	4.66793	UVEXAV
																	3.98304	5.81645	NEJSEC
																	3.98305	5.31373	NAPFOA01
																	3.98397	5.03658	CAZGIT
																	3.98662	5.71977	PUMNIV
																	3.9878	5.04878	GITWIQ
																	3.99192	4.93073	EYULOA
																	3.99776	5.38838	TEQVOC
																	3.99796	4.52715	NADZEZ
																	3.99855	4.70974	PEBNEP
																	4.00194	4.94209	YASLUA
																	4.00278	4.68317	DOYLIM
																	4.00379	6.11234	RAYMAG
																	4.00559	5.12851	RUWWUC
																	4.00719	5.98694	TOLGOR
																	4.0077	6.27145	UTEXAT
																	4.00789	6.12931	PIJJOI
																	4.01037	4.88805	ECEZAO01
																	4.01341	5.16976	IQEWOQ
																	4.01377	4.79857	ECODIK
																	4.01579	5.07535	NAKLIW
																	4.01588	4.65102	GIQYOV
																	4.0168	4.74458	ABEXUC
																	4.0179	4.60351	LUSJAL
																	4.01813	5.12784	ATIBOU01
																	4.02189	6.2924	XICYIT
																	4.02213	4.67742	KANCIN
																	4.02227	8.79809	VEHRIL
																	4.02408	6.70857	PEJRAZ
																	4.02417	5.64641	YARYEV
																	4.02438	5.16708	TIRLIQ
																	4.02471	4.93182	ATIBIO
																	4.02529	4.62524	EQUBIC
																	4.02699	5.10607	LAGNIS
																	4.02903	4.4965	ZERQOE
																	4.0299	5.17293	RUWXAJ
																	4.03008	6.88886	YEHGID
																	4.0339	5.21362	FANQER
																	4.0341	5.07878	YARKEJ
																	4.03476	4.28353	IBUYAH
																	4.03616	4.67624	YARBUQ
																	4.03631	5.08695	VEDVUW
																	4.03658	5.48028	WOPDEL
																	4.03769	4.98664	WIHVEP
																	4.03861	4.89575	UGAQEY
																	4.03981	8.5056	CENJIQ
																	4.04434	4.50512	KAXQOR
																	4.04573	4.96323	TADYII
																	4.04752	6.00946	RIXBEG
																	4.04819	4.6531	OCUPUY
																	4.04921	4.7727	ABEXOW
																	4.05077	5.68269	TOKDON
																	4.05137	4.71118	OSIWUJ
																	4.0515	6.22728	ABIXOZ
																	4.05203	4.58396	OPIPOT
																	4.05314	4.50507	JILXOS
																	4.05507	5.20851	YEGKOM
																	4.05785	12.8102	LEVDIB
																	4.05857	5.42763	SERWAP
																	4.05893	6.19698	CENPUI
																	4.06122	10.6609	UFIREI
																	4.06197	5.74941	NACYOG
																	4.06358	5.93858	VEDFOB
																	4.06488	4.94749	ECEZAO
																	4.06776	5.79435	SUGVUM
																	4.06866	4.98172	WIHVAL
																	4.07005	6.23549	XICYEP
																	4.07127	5.3844	OVIZID
																	4.07167	5.22485	WECJAR
																	4.07807	4.77323	UGUGUZ
																	4.07874	6.01158	VEDFAN
																	4.08045	4.80529	ABEXIQ
																	4.08127	5.13294	PEXTUI
																	4.08148	4.986	WICGEV
																	4.08181	4.65057	VICDOC
																	4.08202	6.52252	JEWCAP
																	4.08598	5.25085	WOPWOO
																	4.08701	5.083	KINQAB
																	4.0897	4.90958	KIPZEQ
																	4.08974	4.44244	OKITAE
																	4.08985	5.22962	KAVTUY
																	4.09417	4.678	EQUBUO
																	4.09997	4.64022	AFITEP
																	4.10247	5.37007	UFATEA01
																	4.10291	4.99697	LAGHIL
																	4.10343	13.4629	FEWWUB
																	4.10445	5.76724	ADAXEK
																	4.10454	6.90363	DUCGEO
																	4.10522	5.84738	ETESIG
																	4.10534	5.16354	LUKRIS
																	4.10574	5.59823	HAFVOB
																	4.10578	4.61384	GIFKAH
																	4.1058	9.15829	PETWOC
																	4.10631	6.32737	NAGQET
																	4.10664	5.114	IBITUK
																	4.10989	5.15523	NAPZOV
																	4.11027	4.77594	UGUHEK
																	4.11372	6.18049	GUWDUY
																	4.11701	4.98066	LALFUB
																	4.11847	4.70314	EQUBOI
																	4.11889	5.43641	ZEXKUK
																	4.12009	4.42418	DEYDOA
																	4.12189	8.21931	CENKAJ
																	4.12193	5.72746	GIYSUD
																	4.12237	5.65756	TAGSEB
																	4.1234	4.82402	HEXNII
																	4.12403	5.91757	VEDGIW
																	4.12997	5.91912	VEDGES
																	4.13348	5.17106	EFOTID
																	4.137	4.67022	GAJZUO
																	4.13773	5.34824	MAHTAR
																	4.13818	5.45963	CUTKOS
																	4.1387	5.55826	LEZZEX
																	4.14038	4.96285	FOHCIP
																	4.14066	7.95891	HIFTOG
																	4.14091	6.01546	KASRAZ
																	4.14157	6.98334	YEYFEP
																	4.14331	4.82084	ABEXEM
																	4.14383	5.43686	DEKHEH
																	4.14776	5.42928	ORAGEU
																	4.14792	6.04006	ENITIF
																	4.14932	5.34764	MAHTAR01
																	4.14994	5.56488	LIDZOP
																	4.15044	4.90168	XECJUK
																	4.15104	7.88297	HIFTOG02
																	4.15655	6.77563	QOPZIF
																	4.15657	6.92899	OWETIU
																	4.15774	7.60733	FAPTOH
																	4.15785	5.18747	IKOSOQ
																	4.15949	4.41725	VASKOR
																	4.15979	4.98838	KEYYET
																	4.1602	7.73235	OQANIE
																	4.16072	5.40468	RIPNIP
																	4.16271	5.05147	KINPUU
																	4.16375	4.69508	BUGSOM
																	4.16389	5.36071	MURTUO
																	4.1656	5.96918	MUGFOK
																	4.16679	4.45514	GIFKIP
																	4.16928	6.10817	DIBJIJ
																	4.17048	4.59875	GOGWEF
																	4.17233	5.00847	MOSDUT
																	4.18132	4.79846	YEYBOV
																	4.18269	4.74189	GAJZIC
																	4.18275	4.72751	BUGSIG
																	4.18424	5.70734	HICVUM
																	4.18459	4.53887	NAGBUU
																	4.18591	5.79604	QOCRUW
																	4.18708	5.75366	UJOWEW
																	4.18887	6.29319	TECVEE
																	4.18996	6.86464	GUBVUU
																	4.19082	4.72085	BUGSEC
																	4.19261	5.97035	QUQPIC
																	4.19271	5.40684	IKEVAW
																	4.1969	5.64744	BELTUJ
																	4.19849	4.88485	SOVHAM
																	4.20147	7.12423	XICYAL
																	4.20205	9.52723	KEVWUF
																	4.20657	5.38643	OJIWAG
																	4.20671	5.55366	COBWEV
																	4.20706	6.32021	HOXKUB
																	4.20794	5.44662	IKETUO
																	4.20957	5.35735	QOMFAA
																	4.21047	6.57975	OFUYUL
																	4.21189	5.10436	OYOSAX
																	4.21505	5.79442	QOCSAD
																	4.21783	5.39984	ILIGAL
																	4.22304	6.03093	SAMLAV01
																	4.22337	5.40466	ILIGEP
																	4.22431	4.76043	GAJZOI
																	4.2277	6.92906	HEFDED
																	4.23271	4.90855	QADBII
																	4.23281	5.11458	ZEDQEG
																	4.23311	5.47175	IKETOI
																	4.23558	5.14127	QIGBIR
																	4.23676	5.6172	RIFQUT
																	4.23694	15.0227	WAVRAO
																	4.2377	5.46375	YISFEL
																	4.23883	8.98552	YIKJUZ
																	4.24072	5.48661	IKETIC
																	4.24208	11.1016	UYAPOA
																	4.24356	6.04512	FIFMOX
																	4.2442	5.57985	VICYUD
																	4.24424	5.23174	ODOXEK
																	4.24661	6.31713	OVEJIJ
																	4.2474	4.7784	FIPWUY
																	4.24987	6.23073	FISPIH
																	4.25222	16.3645	QOWQUO
																	4.25333	5.08668	IBUDOZ
																	4.25341	5.56779	XOQXIL
																	4.25664	5.56472	XADDOX
																	4.25829	5.05781	CUMDIY
																	4.25857	6.30223	COYCEZ
																	4.25931	7.74379	MAGBAZ
																	4.26379	5.5138	IKETEY
																	4.26508	6.76714	TANBOZ
																	4.26512	6.23359	IYUJAO
																	4.26793	4.92293	ISEQIH
																	4.26843	7.50874	VARJEF
																	4.27142	4.70734	CUKXOW
																	4.27158	6.83841	LADHEF
																	4.27166	5.34617	BAEDTA01
																	4.27216	9.42427	AWAWUR
																	4.27265	5.73732	QOMDUS
																	4.27369	4.83981	WEMCAU
																	4.27442	5.76369	TUCJAD
																	4.27554	7.85828	PIFPIE
																	4.27878	5.92256	BELTOD
																	4.27878	6.07415	XAKQOR
																	4.27938	6.06928	KIDVIE
																	4.27966	7.01256	REJLIC
																	4.28078	8.02011	OWAVOY
																	4.28089	6.80431	QIRYAS
																	4.28121	9.61156	EWALUK
																	4.28304	4.62483	PARMIG
																	4.28453	7.72002	PIDMEV01
																	4.28533	4.71676	MIMVEJ
																	4.28663	4.85568	GAJYUN
																	4.28704	4.9863	ZILBAZ
																	4.28733	15.3296	KUCDIW
																	4.28777	4.72075	FUTZOK
																	4.28777	4.80464	GAJZEY
																	4.28799	6.28616	XINWUO
																	4.28976	5.42171	FATLUJ
																	4.29241	4.96705	MABKEG
																	4.29344	5.70322	LESWAI
																	4.29348	4.71891	CUKYAJ
																	4.2951	6.69801	WIYZOU
																	4.2994	7.86111	AXUBOL
																	4.30122	4.60907	OHOMIH

## Sheet: 545 1st NEB setup
CSD refcode	1st NEB setup		porosity descriptors
	propane	propene	Df (Å)	Di (Å)
	(kJ/mol)	(kJ/mol)
NATXIR	0.170707	23.1174	3.18308	3.61932
ILUJAB	1.06692	25.9492	3.19958	7.14322
ILUHON	1.85351	43.7061	3.09029	7.0969
NAQLAT	2.41584	6.55968	3.53855	6.1178
FERVOP	3.90367	2.95516	3.11713	4.39579
UMUTOM	3.94133	7.26886	3.31267	4.23207
NANMEW	3.99154	2.12129	3.30498	7.12956
AXUBOL	4.09655	3.55556	4.2994	7.86111
HEKTUO	4.34718	5.98772	3.27438	4.58935
TEWFUY	4.51035	13.5896	3.76853	5.12402
VIPYOK	4.96641	13.2783	3.89151	4.56016
RUWWUC	4.97645	5.62622	4.00559	5.12851
DUFZOU	5.61493	13.6189	3.0854	7.15398
YARBUQ	6.40068	7.26803	4.03616	4.67624
QITMUC	6.71909	5.02959	2.59294	3.41421
GEGSIW	6.72369	11.234	2.85269	7.85146
KILFUI	6.92494	26.5462	3.53409	4.59875
AZILEA	7.44919	3.17984	2.70328	4.19485
PEJRON	7.82073	25.0789	3.03358	3.5787
PEXBIF	8.6387	11.273	3.2242	4.0229
QEVKOS	9.2458	14.1499	3.94029	4.71244
KETHEY	10.2048	7.60944	3.58603	5.2876
YEZKOF	10.6328	8.05462	3.28691	6.11466
LUTDAG	11.4068	27.3508	2.54566	3.89478
MAHTAR01	11.6232	6.70612	4.14932	5.34764
CODFEH	11.6236	8.62197	3.49285	3.78989
YEZKEV	12.3696	4.97854	3.43415	5.97739
LEMVOP	12.7235	11.2842	3.76828	5.28106
TEHRUU	13.2327	19.8907	3.65221	4.78045
XOVVIO	13.4905	0.963575	3.10979	4.51219
ITIBOD	13.5725	9.26714	3.48306	4.51038
QUPDEL	13.8135	64.9591	3.89395	4.30346
GIFFAE	13.9223	16.0992	3.25577	5.12876
RETBEZ	14.2762	10.0366	3.74465	5.70035
YIWMEW	14.2928	15.3025	3.80264	5.71951
COXQUB	14.4164	23.5961	2.84337	3.99789
VOCNOQ	14.5135	26.3726	3.2968	4.9916
NEJSAY	14.6616	10.0483	3.73257	4.50943
NEJSIG	14.7314	11.4767	2.69394	3.52077
QOMFAA	14.8402	16.1536	4.20957	5.35735
GIFFEI	14.8678	10.4951	3.23803	5.10703
EKEQIV	15.0411	7.73956	3.45461	5.23981
KANMIX	15.136	6.87724	3.95127	9.77148
UJAQAY	15.4808	106.06	2.81383	3.85934
ODOXEK	15.8197	8.97886	4.24424	5.23174
PUWCUF	16.0753	8.09981	3.92719	5.62914
AVIMUO	16.2009	4.71913	3.6399	5.70679
GAWKEW	16.3657	7.11406	3.14287	5.75147
EQOCES01	16.5435	15.9787	3.12659	5.48857
MIZKOW	16.5553	2.1125	3.43471	3.8316
AFOQUI	16.6854	20.8418	3.00568	4.25157
MAHTAR	16.7586	7.181	4.13773	5.34824
HIFVUO01	16.7904	14.2591	3.29929	11.7128
NETFAU	17.213	7.01657	3.37252	5.9815
EPUXET	17.2439	13.4043	3.26125	4.89022
YELYOE	17.3213	10.6889	3.59258	5.04252
ORAGEU	17.607	5.20682	4.14776	5.42928
RIDGIW	18.0075	11.2943	3.52892	5.01403
WIDZUG	18.2908	14.9356	3.48109	5.41352
ELIJOZ	18.4318	15.0306	3.85268	5.0309
POKGEC	18.5908	18.1996	3.87743	4.44927
VAKBIU	18.6954	30.1474	3.81153	5.76642
GIHPEU	19.1029	15.4214	3.28751	6.0987
GULPIN	19.2937	16.3289	3.49743	4.25802
CABQEB	19.3008	14.8135	2.70603	3.76405
QUPJAN	19.4502	12.1177	3.61461	5.93426
NIVNUC	19.564	22.2693	3.15608	5.02349
HAJMEL	19.5912	10.8797	3.62462	5.95786
VIPXUO	19.6125	53.2724	3.23579	4.31173
EWIDUK	19.6133	12.7093	3.18631	11.3903
REYCOP	19.8949	12.6035	3.16913	3.95649
APEBED	20.1117	9.55835	3.62787	4.58202
FOHQUO	20.192	15.567	3.45753	4.34506
BAKGAX	20.4932	36.6853	3.05498	4.24107
OVIDON	20.615	17.0406	2.81637	4.40281
HIYZEV01	20.802	14.7879	3.19057	6.77675
INURIS	20.9012	1.93761	3.09799	5.07769
EBIPIQ	20.933	17.7791	2.76098	3.95804
XIPBII	20.9618	9.5186	3.16573	7.09224
DIBPIP	21.12	23.7856	3.33216	4.52354
FAWCEN02	21.156	16.7193	3.44691	11.4225
CIQYUX	21.2451	14.9649	2.60872	3.59028
RIPTAM	21.5522	11.2709	3.16505	5.57227
XAKQIL	21.8007	127.05	2.67531	3.43867
SEYFAE	21.8727	5.72999	3.30607	4.13987
LUKRIS	22.0815	8.78807	4.10534	5.16354
CETVAA	22.1626	25.0596	3.28831	4.44677
XENMOU	22.1919	31.4829	3.44611	4.29825
UBACOR	22.4099	26.2303	3.33609	5.7806
CAWZUX	22.4329	19.9372	3.15287	4.75634
SETXAS	23.0317	26.4688	3.02112	3.80992
WALBOC01	23.1371	17.7891	2.9953	4.21583
UNIPAJ	23.1919	31.3926	2.61552	4.43325
NIHBEM01	23.3961	11.2558	3.68372	4.87963
NEYBEZ	23.517	0.174473	3.8906	4.95206
DEYJOI	23.6576	18.9447	3.64055	5.20142
EXOZEX	23.6927	9.73659	3.02039	5.85437
NIKYUC02	23.8605	9.24371	3.78234	5.06856
YEZFIU	23.8739	10.8198	3.87237	7.76134
NIHBIQ02	23.9597	9.51944	3.95166	5.38184
WEBREC	24.2082	8.73787	3.78553	5.39661
YEZKIZ	24.2659	20.4037	3.34196	5.88797
RATCUL01	24.2718	9.67759	3.6752	4.69215
WEMCEY	24.3049	16.2967	3.5623	5.09454
WEMCIC	24.4806	16.987	3.47331	5.03643
NIKZEN02	24.5722	10.4466	3.78699	4.94738
MODNIC	24.6464	10.5451	3.69522	5.24657
CDLGLU10	24.7735	27.6964	2.76994	3.40131
FAWCEN01	24.8304	22.2078	3.32888	11.3331
UMUTUS	24.9458	15.5143	3.20383	4.6588
RATCUL03	25.1216	9.49308	3.7831	4.74713
NUCREJ	25.3483	31.0838	3.35735	4.13308
GUJVOX	25.4601	18.7983	2.74095	3.98106
GIKQIC	25.4776	22.2785	3.47181	3.78387
DIZQOT	25.7852	17.3695	2.72478	3.46252
VAJTUX	25.791	23.3886	2.91526	4.46543
FAWCEN	25.8751	23.7739	3.26381	11.3269
COYVES	25.8764	28.5663	3.06175	4.87211
RASXIT	25.9534	17.4724	3.51139	5.08501
KIYMAI	26.0538	19.2171	2.95812	3.94719
PEGQID	26.1416	17.5393	3.46018	5.05756
NIKZEN01	26.2638	10.7926	3.71164	4.86464
RATCUL02	26.3195	9.9801	3.72749	4.70959
COYVES01	26.4395	20.6786	3.01821	4.8567
NIKZEN	26.4768	10.2947	3.70751	4.82301
PELXIP	26.6157	12.7386	3.66818	5.04305
HIWKEE	26.7044	23.1107	3.90302	5.3362
VARRIP	26.7132	12.6286	3.2656	6.075
PEGQOJ	27.0161	19.8071	3.45218	5.06893
FUYYAA	27.1881	23.7204	2.50265	4.5706
WICQIJ	27.2362	13.3834	3.08082	4.1309
DAJHUS	27.2387	21.4208	3.20599	4.35025
ZIJVAR	27.4554	13.5185	2.63372	3.81019
NIKYOW02	27.4567	10.9144	3.68194	4.72463
TISKOW	27.4801	17.4368	2.95571	6.20375
GUPBOJ01	27.5713	15.3829	3.8895	5.5554
PAPPIH	27.591	25.8918	2.61175	3.83347
OGUPIQ	27.5939	5.00908	3.53796	5.83456
NIHBEM	27.6638	11.6696	3.66332	4.82471
YANBAR02	27.7198	12.0591	3.83765	4.9953
COYTUG	27.8265	16.3703	2.93224	4.86988
RASXEP01	27.8278	17.167	3.45083	5.09989
LIFWEE	27.9717	14.3628	3.86694	4.94583
LABGAY	27.9901	18.8343	3.23821	4.46512
JIQVAH	27.9922	12.2056	3.31132	4.60365
NIKYUC01	28.1324	11.4006	3.68791	4.94759
WEMDAV	28.3508	20.5225	3.48688	5.02432
GAWJEV	28.3884	12.8353	3.38284	4.86365
XEJXAN	28.4353	30.6101	3.60567	4.27901
RAVVIU01	28.5583	14.495	3.5679	4.59869
EDAGAT	28.6642	13.2486	3.62215	4.66461
NIKYUC	28.9663	11.242	3.64376	4.9018
GIHPAQ	28.996	13.8833	3.20702	6.0679
KAVKIC	29.0244	22.3677	3.4738	5.02071
EMICUZ	29.0252	12.1922	2.53854	4.0744
FULQOT	29.2947	22.8007	3.50634	5.67142
ROSCEH	29.5641	25.5379	2.78001	5.64584
FUZKAN	29.5809	11.7068	3.23595	5.06549
GIZJOP	29.5934	26.4303	2.78115	5.3179
NIHBEM02	29.7194	10.6633	3.78432	5.01891
QUVDUH	29.7282	31.2156	3.20462	3.94913
NIKZAJ02	30.0587	11.6064	3.68938	4.67382
TEVZEA	30.0851	15.4586	3.52297	4.59329
JOCPIB	30.0855	47.0922	2.58872	3.51546
AMUCOB	30.1491	47.2796	3.31743	4.03909
FALJAF	30.2541	41.1107	2.60346	3.79701
QARTAG	30.3152	26.3973	3.02862	4.89851
XEHSAF	30.5846	14.5725	3.65952	4.88747
MAJHOW	30.8085	20.7539	3.2085	5.19955
HIBGEF	30.8846	34.954	3.60956	4.68206
MOGYAI	30.8942	13.3306	3.28293	4.73161
GEGWAS	31.1997	8.82406	3.17954	5.44742
ZIGWUJ	31.2867	19.3284	3.34297	5.41641
UZAFAD	31.3072	15.3423	2.53482	4.26412
BEPVOJ01	31.4972	26.4994	3.97854	5.12362
TEVZIE	31.6812	14.6072	3.64059	4.89772
XADFAL	31.9892	29.188	2.96961	4.26653
AHUTIH01	32.0469	20.8823	3.24781	4.18118
RAVVOA01	32.0938	13.0156	3.65894	4.63178
NAXVOY02	32.1222	33.5243	3.68126	4.76846
CAWGAJ	32.3892	24.4057	2.95239	5.29963
XINJAH	32.521	21.3681	3.21135	5.1973
ZAVMIU	32.6327	17.6297	2.90422	5.45393
CUKXOW	32.8176	28.1315	4.27142	4.70734
TIQGEG01	32.877	60.2952	3.07037	3.98024
XOQXEH	32.9126	20.6208	3.13265	5.17553
LALPIZ	33.0394	15.308	3.30829	4.79448
MAZJAY	33.0733	4.78189	2.9425	5.84732
TESGUU	33.1394	16.2933	3.58268	4.82436
COYVAO	33.4339	19.4841	3.28007	5.01094
FASJAL	33.5502	46.0002	2.75862	3.2844
ODAJAG	33.6331	20.2895	3.25151	4.17677
TEBCEK	33.7205	23.9969	2.86477	3.71564
QUVDOB	33.8414	44.7002	3.19827	3.95151
POXHOA	33.9151	21.0539	3.29845	3.6953
ELIKAM	34.1021	10.9638	3.82798	5.04335
HORCOH	34.2159	41.1367	2.55379	3.95095
OPURIB01	34.3314	62.1165	2.50996	3.56695
CAKXIX	34.3402	19.7071	2.81759	4.13408
XULCIR	34.3423	86.2665	3.17631	4.97155
DAPXEZ	34.3699	16.4737	3.282	4.82667
PEGQUP	34.8862	20.8447	3.49069	4.99244
CAKYAQ	34.9582	29.3767	2.78322	4.08997
COYTEQ	35.092	51.7674	3.37897	3.8382
NIVNOW	35.1812	20.4125	3.10602	4.9886
PEGQAV	35.359	22.0129	3.15291	5.14547
GELVEZ	35.7678	31.5415	2.61776	3.84426
DEGJIK	35.9623	25.9228	3.8442	4.49857
HAKCIG	35.9657	16.121	2.97433	5.39588
PASKAX	36.0987	29.5625	2.83696	4.533
ELILER	36.1272	6.04923	3.66982	4.98078
ENUCOG	36.1272	21.5028	3.25846	4.91468
GIKMOD06	36.1548	26.4257	2.5601	3.96173
GIKMOD07	36.1548	26.4257	2.5601	3.96173
PAPXUB	36.2954	36.0171	3.74838	4.14867
XOBXIW	36.3753	14.3344	3.51548	4.67713
CAKYIY	36.4761	30.9457	2.74254	4.02936
CAKYEU	36.5104	30.9725	2.75795	4.05316
HAJLUA	36.5832	48.162	3.59787	5.93833
FASQUN	36.8364	20.8811	3.03904	5.13227
XAXQEU	36.8559	23.9587	3.21043	4.2322
DEYJIC	36.8644	27.8826	3.79158	5.18714
UTUMAY	36.8728	27.1316	3.06783	4.48241
EVOHOM	36.9832	45.6441	2.65551	3.57984
IZEHAX	36.9958	26.9429	3.14826	4.457
GIKMOD	37.2376	5.45092	2.55442	3.93708
SEYFEI	37.2464	7.35547	3.18681	4.05966
OFERUN03	37.2903	21.5258	3.40962	11.4629
JEMNAR	37.3041	43.7324	3.17172	5.0633
GITTOT	37.7773	22.5706	3.07343	11.4137
ELIKUG	37.7828	7.54961	3.7268	4.95561
QUVFAP	37.7911	65.6122	3.20053	3.97696
WALBOC02	37.902	25.2881	2.99285	4.1969
POVXII	38.2468	33.9707	2.81232	4.522
NAPFOA	38.4844	24.4346	3.96344	5.40777
HORCUN	38.5568	36.2305	2.58122	3.98209
IDUDES	39.1074	55.0301	2.97646	4.4794
GIKMOD05	39.2911	27.3169	2.53368	3.93179
ADABIS	39.4346	22.599	3.05346	3.98906
YOPMAS	39.5451	34.3665	2.78834	3.73773
PEGPUO	39.6643	28.4847	3.11785	5.11559
PEGBEK01	39.7028	25.2007	3.43767	4.25489
PEGBEK02	39.7957	29.6746	3.47614	4.27091
DICVES	39.8769	39.6995	3.59662	6.33441
WALCET	39.8777	30.7009	3.07523	4.22225
VOTMAS	39.9689	22.2505	2.95777	4.44531
OJAKOA	40.0384	15.862	3.37132	4.13561
WOCVUG01	40.04	25.9672	3.41671	4.33403
GELVEZ01	40.1191	31.085	2.63566	3.8103
GIKMOD02	40.1597	28.0219	2.51015	3.9282
GIKMOD03	40.4329	28.5964	2.50215	3.92289
MUXHUI01	40.5907	131.139	2.62136	3.32627
NUVYIN	40.794	7.72492	3.39858	5.06465
WOPDEL	40.9697	18.8698	4.03658	5.48028
XIMPOA	41.2622	38.2585	2.99963	3.66828
WOCVUG	41.2885	22.4526	3.56283	4.37067
LIDZUV	41.7664	32.6134	3.77339	5.12552
GITTOT01	41.8802	22.158	3.10209	11.4006
PEGCAH	41.9379	21.1229	3.55963	4.41751
UTEXIB	42.0241	14.1461	3.96492	6.29701
NABNUA	42.0864	36.5912	2.88021	4.40845
NARTIL	42.1203	23.5626	3.84842	4.48691
ZEFVOX	42.2375	65.6177	2.50004	5.14664
CITXUZ	42.4383	17.159	2.7632	5.80705
QEZZIF	42.4806	14.0716	3.32799	4.67652
UXEQOE	42.5542	21.1572	3.38382	4.72647
QATRAG	42.6542	27.6023	3.21676	4.21344
ILUFIF	42.7688	58.3208	3.09218	7.09777
GIKMOD08	43.4437	21.2744	2.56651	3.94198
ETUWOG	43.4935	29.0801	2.63619	4.3132
ELIJUF	43.5048	8.14667	3.63869	4.98722
PIHNUQ	43.5467	37.164	3.62057	4.36505
NAPFOA01	43.8232	26.9366	3.98305	5.31373
TETWOG	43.8893	43.1224	3.07417	3.76455
FIYDOH	43.9634	77.7801	3.85906	4.62011
VODPOU	43.9864	29.5851	2.86572	4.01882
BIVXEK	44.0822	34.1163	3.13827	4.38344
DUXKEN	44.5855	53.3125	2.66706	5.19652
IHIWIF	44.6019	32.2206	2.56403	4.71706
PIGXAF	44.8416	22.3442	2.94053	4.48463
GIKMOD10	44.8458	5.67267	2.59885	3.94696
ZNGLUD	44.8516	36.2134	2.66271	3.19455
KUGQIN	45.0671	39.8639	2.51861	3.46967
PEGBUA	45.3529	457.127	3.44241	4.24178
HAZGOF03	45.4236	16.5465	2.99139	3.92084
GETXAG	45.5407	33.9649	2.61071	3.33124
OJAKUG	45.6165	205.324	3.17471	3.99498
HOJLEY	45.7462	17.9046	2.83052	3.63337
GIKMOD11	45.7575	17.3824	2.61268	3.92028
HAZGOF04	45.8767	15.0729	2.97152	3.91146
EHUCOA	45.9265	29.6286	3.25891	5.17903
XAKRAE	46.7194	287.938	2.61921	3.51244
FECWOB01	47.1315	64.2031	3.04516	4.17085
CAZFOA	47.303	30.9913	2.95907	3.89004
MODDEP	47.3424	48.288	2.69903	3.3093
EXUMOZ	47.7336	40.8421	2.99752	3.8372
KIFXOO	48.0373	14.4771	3.02702	4.97615
QALNEW	48.3156	40.012	2.74105	3.78403
TUVDIX	48.4633	66.5716	3.21232	7.26897
YUJNOH	48.7419	41.1174	3.46452	5.27714
HELCUY	48.8444	35.1619	2.60112	3.75849
GIKMOD09	48.852	5.81702	2.58011	3.94339
NIRDOI	48.8741	45.1521	2.74753	3.72517
ZEJCUO	48.8758	31.0741	2.60004	3.4618
HEBTAL	49.0725	19.7301	3.03297	4.70614
YASNAJ	49.116	42.9446	3.22962	5.78381
WUZRUE	49.1185	17.9945	2.62616	4.22154
NIKDIU	49.4791	24.8973	2.52089	3.57373
HAZNON	49.6967	58.4045	2.60838	4.92903
XOVVEK	49.7528	42.2869	3.32854	4.5587
ITIBET	49.8858	31.2168	2.8532	4.61324
VONBUW	49.9415	43.4362	2.90353	4.78685
TEJQAC	49.9988	39.9802	3.19439	3.76144
LUSZOP01	50.2026	5.93877	2.56857	3.94583
LUSZUV	50.3666	5.01871	2.56912	3.94192
ELILAN	50.5536	57.6593	3.69174	4.95628
WEDXAG	50.6247	57.848	3.16246	4.61914
WIDZOA	51.0163	39.6053	3.17117	4.22629
BIBBUL	51.1452	7.99813	3.31702	3.85878
ZEGSUB	51.1603	28.4215	3.30813	7.31541
PUQHIT	51.5645	24.7011	2.80454	4.11931
EBEMII	52.0356	11.8508	3.57779	4.74887
KAVTUY	52.1573	33.4276	4.08985	5.22962
IQIPAZ	52.3435	23.5476	3.36787	5.68593
MEHPAQ	52.6569	38.9154	2.64049	3.09554
OFERUN02	52.8075	36.9192	3.12691	11.4294
LUWYUY	53.31	22.8689	2.93207	3.68471
JASNEX	53.9757	32.4139	2.72372	3.25557
TETZID	54.0305	30.511	3.8044	5.13889
BEPVAV	54.0493	48.3687	3.25406	4.46396
KIBDEF	54.2928	40.3559	3.92279	4.31905
ISACIP	54.3824	72.3309	3.32925	4.48211
QOXNIB	55.2121	21.4221	3.61253	4.25979
LIRTEM	55.2175	27.1044	3.08988	4.39679
FIGQUJ	55.3112	37.9112	2.87726	4.99341
LUSZIJ01	55.4815	20.3945	2.57303	3.93885
PEFSEA	56.6551	44.5157	2.87938	4.38811
YUJNIB	56.9267	40.8509	2.59839	3.94507
RAXDAX	56.9769	10.6412	2.80345	3.78
LUTCIN	57.0388	15.8565	2.5461	3.89894
FEVDIV	57.5856	54.0037	2.53303	4.11804
LERNEC01	58.1589	45.47	2.64138	4.91469
GUPJEG	58.4216	41.4463	3.38841	3.71266
FEJKEM	58.5329	8.02868	3.08881	3.45598
CUGLTM	58.6212	54.0744	2.69075	3.17988
KAXQOR01	58.9199	16.1963	3.66075	4.99192
KAXZUG	58.9212	66.2515	2.59156	4.51369
HUTTIA	58.9764	37.4698	2.94896	4.93965
NIKZAJ01	59.2417	193.568	3.61538	4.60883
TAFBIN	59.4563	26.2952	3.22691	4.89948
LUTCAF	59.4647	15.8816	2.5592	3.90986
XEHSUZ	59.7253	40.4358	3.78928	4.73753
DOHYIJ	59.968	22.8442	3.118	3.65608
XEHSIN	59.9697	41.0262	3.64676	4.81303
MUFJED	60.1567	38.2493	2.67066	3.41421
VAGKOF	60.1952	46.175	2.62002	5.16963
XEHSEJ	60.7333	43.8843	3.85188	5.24127
WAHREE	60.9789	35.4523	2.85009	4.96921
MUFJAZ01	61.3939	34.5444	2.67319	3.39058
FOHSAW01	61.4194	35.8924	3.30187	4.19352
HAJLIO	61.6667	52.3753	3.51824	5.88281
ZNGLUD01	62.2588	28.437	2.59565	3.16473
REJVOS	62.4412	40.5103	3.67275	4.89378
HIDMEO	62.5257	85.7469	2.55733	3.70259
JEJKEP	62.6709	39.1555	2.80032	5.0932
VAQLAC	62.9407	33.9222	2.78544	3.80978
ILUHIH	63.4043	61.4881	3.05989	7.14256
BARZAW	63.7822	55.9715	2.55685	7.73837
XEHSOT	64.398	56.8405	3.63666	4.76348
KIFKAM	64.7989	50.2277	3.04859	4.32056
MIHHUG	64.8524	49.4461	3.29973	5.15935
LIHSIF	64.9106	51.2414	2.5942	4.51896
CEFLEF	65.1449	72.7263	3.11475	7.24143
EVUNIT	65.2938	23.9258	2.62968	4.36696
ECUCIP	65.9896	3.40452	2.64336	3.79378
NERVOV	66.4164	46.4453	2.77559	5.20555
TOHPUC	66.7737	47.657	2.51178	4.09389
ESIPUR02	66.913	56.161	2.81655	4.9703
BARZOK	67.2842	43.4358	2.7399	7.65896
ILUJIJ	67.3498	54.2414	3.15378	7.16071
AMIKOX	67.5369	29.0077	2.69518	3.46941
XUYDIF	67.5766	36.1853	2.90765	3.88622
FIRVEH	67.9858	36.1703	3.26577	4.11749
YEYYAC	67.9984	32.5072	3.00875	6.35432
UTEXAT	68.3456	13.5352	4.0077	6.27145
IVARUT	68.3933	43.3308	2.98662	3.98401
FIHLOZ	68.6825	40.0631	2.95224	5.07016
TAFCIO	68.8599	40.9003	2.87014	5.00686
VARREL	69.1569	68.6297	3.2556	6.17066
OCIVIH	69.2452	49.4381	3.22991	7.04533
VEJYUF01	69.4377	45.3713	2.60028	5.23877
WOHZAU	70.2376	38.2024	3.1609	5.02471
BONNIC	70.333	69.8121	3.03382	4.09843
HEDTER	70.7175	45.2307	2.7809	4.77494
DOTWAL	70.7937	41.7111	3.24941	6.26428
CERMIV	70.7966	104.204	3.15163	6.14808
CILDAD	70.9506	40.3451	2.50478	3.07453
FAFJIH	71.6129	30.8311	2.55624	3.61922
TUVDOD	71.6259	57.7894	3.14901	7.2437
FAHTUE	72.6342	48.2541	3.1424	7.2202
MIHHOA	72.8685	97.4441	3.21821	4.98547
HAJLOU	73.5957	50.2164	3.5289	5.886
CAHSOU	73.6217	75.3651	2.77879	4.04164
EZUCOS	73.9346	39.3133	3.17302	6.21547
ZEFVIR	73.994	69.3289	2.5027	5.15122
IPOWOA	74.1576	73.5698	2.83702	4.16556
IJENER	74.4953	56.6639	2.57734	6.00155
PUNFIO	74.671	63.9738	2.52759	3.61049
IBOTAU	75.1179	46.3186	2.91754	6.68004
NERVEL	75.6392	50.7373	2.50642	4.91794
MECLEL	75.7367	75.6496	2.85573	6.56223
LEVYOC	75.858	20.8928	3.53475	4.43687
XALTOV	75.8852	48.4382	3.00948	12.1705
XEHFUL	75.9019	52.618	2.60046	4.30377
PEFTAX	77.0521	28.3207	2.87105	4.53798
GINDEO	77.7387	24.2086	2.70694	4.38238
KAVRIK	78.2358	40.8371	2.9714	5.59809
CUNXIS	78.6994	85.1511	2.77205	4.73091
CUNXIS10	78.6994	85.1511	2.77205	4.73091
EKARUE	78.9596	55.8267	3.20781	4.2283
CUGLTM01	79.9085	61.6504	2.6439	3.16369
NABCIE	81.6332	68.9301	2.59798	3.55623
HEDCEA	81.6847	93.7626	2.92557	4.7556
MAZJEC	82.0901	62.7977	2.93292	5.75047
KAVREG	82.7825	44.6805	2.83796	5.54039
TAKYOV	82.8809	90.6966	3.04881	7.07022
ILUFOL	83.0524	78.3872	3.06586	7.10596
QOPHEI	83.6988	138.611	2.56912	3.51928
KOMHAW	84.2059	52.2297	2.83423	4.30719
NOFQII	84.6348	92.076	3.25534	6.19412
GEVKID	84.9515	47.0432	3.02065	4.59038
ELIKEQ	85.3201	15.5289	3.80728	4.99766
GUPJEG01	85.7197	41.5467	3.35645	3.68475
SAKDEP	85.8243	58.527	3.20042	5.60133
OPENIH	86.1611	47.8269	3.18264	3.75861
TUVDUJ	86.6757	59.8814	3.15351	7.30526
PAZXUJ	86.8067	63.6658	3.12538	3.82629
KAVROQ	86.9213	48.1265	2.87136	5.56636
ZETQEW	87.7305	73.0263	2.73604	4.43317
KOLWEO	88.5067	51.1787	2.59235	4.80101
DAGDIZ	91.3635	53.2485	3.58733	6.53637
EJEFOP	91.4677	54.8397	2.84987	4.0642
IFEPIT	92.0936	14.1637	2.50502	3.789
XIPBOO	92.617	49.1704	3.03689	7.07279
BERFIP	92.8756	107.977	2.71437	4.07847
FAHVAM	94.0019	87.6004	3.20421	7.31279
EVEGER	95.3107	44.1563	3.24345	7.46813
KOBPIB	98.293	71.7669	2.92426	4.11167
QIFLIC	100.424	81.4123	2.79398	5.58826
OGIYAF	100.765	81.165	2.65637	4.13022
DEYXIQ	100.849	66.5612	3.32439	4.50777
TAKYEL	100.906	63.7767	3.12698	7.08036
MOYNEU	100.921	117.221	3.36595	4.54965
UNEBIZ	101.61	21.9564	2.99503	5.60217
GAWBEM	101.726	72.1803	2.72795	3.68052
PASNEE	102.25	1.18826	2.83674	4.1572
FELVOJ	102.28	63.0412	2.59168	5.97797
XUNJOG	102.939	72.9313	2.67373	3.24837
XEXNEV	103.064	57.4103	2.62071	4.91208
BARZIE	103.822	46.742	2.59337	7.74818
MAYPIM	105.849	68.8168	2.65055	4.30951
BONWAD	106.706	130.633	2.72512	3.83514
ILUHUT	106.893	40.9404	3.21073	7.11344
REYBAA	107.022	60.2546	3.50951	4.19945
IWEPUW	107.265	54.9443	2.51109	3.20048
DUGBAJ	108.165	64.5466	3.05086	7.13438
PELNEA01	108.498	73.5346	2.80911	3.35506
ZETQIA	108.623	70.5535	2.70419	4.38937
ILUGOM	108.809	65.9147	3.07068	7.1541
ZETPUL	108.999	72.0071	2.77473	4.3933
COYTUG01	109.782	11.2022	2.85255	4.85681
ILUJEF	109.838	39.0618	3.13122	7.09377
WEWGAH	110.591	60.4253	2.55363	3.68933
HEFDIH	110.982	57.6743	2.61069	4.92199
LUTBUY	113.879	116.227	2.5829	3.93905
CELZIE	114.203	97.7834	2.63187	5.88328
QUKYOL	114.632	101.005	2.89067	4.31995
DUFZUA	115.374	88.8054	3.11961	7.17076
BAKLIK	116.904	161.023	2.89089	6.44441
XUNJIA	118.7	109.742	2.86382	3.16551
GAXGIX	119.305	68.7917	3.1306	4.87192
ROJNEJ	120.243	60.6262	2.77756	4.01951
FELVEZ	120.473	74.5739	2.53239	5.91981
ECORIX	120.976	69.3971	3.03659	3.90772
XOJCUV	122.008	85.0595	2.50912	4.0943
CUYVOI	122.256	67.357	2.63151	4.52428
MAKSUO	123.994	20.7108	2.87742	3.81372
FELWIE	124.189	77.6914	2.50992	5.9068
EVUNEP	124.487	35.8485	2.63132	4.38284
GATHAL	125.381	29.7968	3.00882	3.98213
HAOAER	126.031	150.645	2.51122	3.28684
WOWHAR	126.894	99.6386	2.65556	4.10947
XUWVEQ	128.523	160.694	2.7861	3.87598
HURQUG	129.137	48.9963	3.21738	6.31221
FASHUD	129.922	5695.64	2.60168	3.83677
UBOGAV	131.671	103.703	3.09037	5.07523
ILUGAY	132.286	61.4337	2.93792	7.03145
ECUCUB	138.509	108.216	2.8656	3.57107
LUPHIN	139.867	74.9999	2.56897	5.12922
WALBOC	140.914	132.578	2.9644	4.17363
NERTAH	143.529	138.444	3.46995	4.54882
LUTBEI	143.591	94.4337	2.55814	3.92652
KEQZAJ	145.606	138.269	3.11001	4.82685
MAQZOV	148.501	89.815	2.59641	3.79529
UBACUX	148.576	70.5887	3.40268	7.27569
YAPYUK	149.007	97.5307	2.51848	3.81265
WOWHEV	153.575	112.709	2.59845	4.07173
FUFREE	157.339	48.321	3.09275	3.74304
EYULOA	158.689	191.881	3.99192	4.93073
XAPYAO	158.968	40.9848	3.04724	4.15939
EXIDEV	159.867	65.7357	2.86096	4.20107
SESDEA	160.817	99.1558	2.67675	3.28889
QUKYUR	160.856	112.238	2.88893	4.2216
GEPDIQ	161.08	10.1127	3.20855	4.79078
LUTCEJ	161.973	102.931	2.58728	3.9269
GEHSAN	163.312	130.304	2.65292	4.21897
DODHUA	164.932	139.541	2.64299	3.82979
LACGED	166.31	239.189	3.44165	5.2733
NIHBIQ01	167.359	131.805	3.89271	5.30133
TIQGEG	168.56	159.926	3.05406	3.99152
CEGWER	191.289	122.895	3.87534	4.43901
EBANAY	207.174	73.4409	3.18083	3.59235
EDAGEX	209.158	142.105	3.69066	4.90414
XOKHIP	213.263	81.6466	3.45863	4.7478
TESHAB	215.528	164.463	3.84947	5.24315
RATDAS02	215.528	186.348	3.63147	4.66068
ICANEH	222.655	80.3533	2.8069	7.44304
QEZZOL	224.778	837.511	3.45747	6.25588
PEGCEL	228.031	453.286	3.89017	4.60881
KEXPOU	231.56	175.113	2.7409	4.06064
YICGOI	249.71	246.432	2.62761	5.21305
RAVVIU	250.417	101.647	3.5768	4.57827
IXURAV	291.877	33.1611	3.9269	4.70928
NAXVOY01	306.717	1184.21	3.67769	4.75058
XEJTIR	349.1	320.57	2.90436	4.61538
CELKEL	365.878	304.904	2.68133	5.6698
LEMNOH	379.037	201.111	3.09524	4.05561
MIJYEK	403.943	26.8203	3.22254	5.3671
WONXIH	407.458	72565.2	3.2937	3.7089
GAGXAP	513.088	4687.88	2.84597	5.16363
ESIPUR	626.696	360.922	2.80803	4.97103
BEKSAM	823.671	40707.9	3.3801	4.03684
RAVVOA02	7252.09	289.389	3.65202	4.70077
RUBHOM	9028.28	792.32	3.15399	3.70221
HAJLEK	233846	116.805	3.45438	5.87742

## Sheet: 512 2nd NEB setup
CSD refcode	2st NEB setup		porosity descriptors
	propane	propene	Df (Å)	Di (Å)
	(kJ/mol)	(kJ/mol)
HIYZEV01	5.75216	22.4957	3.19057	6.77675
EBEMII	6.67013	56.0267	3.57779	4.74887
NAQLAT	6.79021	6.9287	3.53855	6.1178
ILUJAB	7.12535	32.0704	3.19958	7.14322
NATXIR	8.10357	37.9673	3.18308	3.61932
QEVKOS	8.1111	7.06887	3.94029	4.71244
VIPYOK	9.12698	20.7639	3.89151	4.56016
NANMEW	9.24664	3.50201	3.30498	7.12956
RETBEZ	10.7374	10.7378	3.74465	5.70035
KETHEY	11.4361	7.32618	3.58603	5.2876
MAHTAR01	11.547	11.0386	4.14932	5.34764
CODFEH	11.5784	63.6114	3.49285	3.78989
LEMVOP	11.5939	30.7691	3.76828	5.28106
AZILEA	11.9809	36.1849	2.70328	4.19485
UTEXAT	12.7821	9.7027	4.0077	6.27145
EWIDUK	13.4666	17.8535	3.18631	11.3903
EQOCES01	13.5854	13.9495	3.12659	5.48857
CABQEB	13.8842	15.2867	2.70603	3.76405
KANMIX	13.929	7.52158	3.95127	9.77148
PUWCUF	13.9336	8.63619	3.92719	5.62914
XOVVIO	14.9143	9.3186	3.10979	4.51219
UMUTOM	15.3335	30.4737	3.31267	4.23207
ODOXEK	15.5728	8.79058	4.24424	5.23174
WIDZUG	16.2105	12.1227	3.48109	5.41352
AXUBOL	16.2335	7.48016	4.2994	7.86111
UTEXIB	16.6481	12.644	3.96492	6.29701
ORAGEU	16.7564	9.25413	4.14776	5.42928
YELYOE	17.3167	19.6204	3.59258	5.04252
POKGEC	17.6021	14.4482	3.87743	4.44927
HAJMEL	17.6284	17.7966	3.62462	5.95786
HEKTUO	17.6933	58.6986	3.27438	4.58935
MAHTAR	18.0243	12.3277	4.13773	5.34824
RIDGIW	18.6807	10.9056	3.52892	5.01403
AVIMUO	18.9682	43.9479	3.6399	5.70679
NEJSAY	19.1799	26.2149	3.73257	4.50943
ITIBOD	19.2079	7.51781	3.48306	4.51038
NEJSIG	19.2577	50.0557	2.69394	3.52077
EPUXET	19.3631	14.0549	3.26125	4.89022
RASXIT	19.5184	13.9913	3.51139	5.08501
APEBED	19.8991	21.2568	3.62787	4.58202
RASXEP01	19.9702	17.7778	3.45083	5.09989
WEMCEY	20.2255	17.7987	3.5623	5.09454
NETFAU	20.2263	11.6269	3.37252	5.9815
PEGQID	21.1669	19.7778	3.46018	5.05756
PAPPIH	21.3041	48.2047	2.61175	3.83347
RIPTAM	21.3606	8.03537	3.16505	5.57227
WEMCIC	21.4304	17.6397	3.47331	5.03643
MIZKOW	21.5974	18.2866	3.43471	3.8316
FOHQUO	21.7714	17.1837	3.45753	4.34506
NIHBIQ02	21.8321	10.0726	3.95166	5.38184
COYVES01	22.056	65.5373	3.01821	4.8567
VIPXUO	22.1769	65.1018	3.23579	4.31173
FAWCEN02	22.325	10.0094	3.44691	11.4225
RATCUL03	22.5271	9.34998	3.7831	4.74713
RATCUL02	22.6133	10.3759	3.72749	4.70959
DEYJOI	22.666	23.6455	3.64055	5.20142
INURIS	22.6949	13.5524	3.09799	5.07769
NIKYUC02	22.8057	9.94537	3.78234	5.06856
RATCUL01	23.0179	9.63492	3.6752	4.69215
NIHBEM02	23.1103	9.63701	3.78432	5.01891
GAWKEW	23.1262	10.8617	3.14287	5.75147
NIHBEM01	23.2208	12.2256	3.68372	4.87963
VOCNOQ	23.4237	32.0248	3.2968	4.9916
YEZFIU	23.4722	12.075	3.87237	7.76134
HAJLUA	23.5534	45.4299	3.59787	5.93833
REYCOP	23.586	14.7678	3.16913	3.95649
COYVES	23.8111	28.734	3.06175	4.87211
CDLGLU10	23.904	25.9211	2.76994	3.40131
NIKZEN02	24.1233	10.4855	3.78699	4.94738
DIZQOT	24.4689	24.3731	2.72478	3.46252
NIKZEN	24.6986	10.5048	3.70751	4.82301
BAKGAX	24.8697	47.6934	3.05498	4.24107
PEGQOJ	24.9492	19.7066	3.45218	5.06893
NIKYUC01	24.9772	11.3374	3.68791	4.94759
UMUTUS	25.04	15.0381	3.20383	4.6588
YANBAR02	25.0638	10.9307	3.83765	4.9953
YARBUQ	25.1362	8.33202	4.03616	4.67624
FAWCEN01	25.3182	21.6083	3.32888	11.3331
NIKYUC	25.4437	11.4989	3.64376	4.9018
LUTDAG	25.5165	45.3006	2.54566	3.89478
NIHBEM	25.5245	12.2687	3.66332	4.82471
PELXIP	25.5705	11.5901	3.66818	5.04305
TISKOW	25.6437	18.1916	2.95571	6.20375
EDAGAT	25.7065	11.9139	3.62215	4.66461
TEBCEK	25.7613	20.7736	2.86477	3.71564
GIFFEI	25.9747	54.7748	3.23803	5.10703
OGUPIQ	26.1328	5.92622	3.53796	5.83456
NIKZAJ02	26.2295	12.552	3.68938	4.67382
TEHRUU	26.3048	67.3574	3.65221	4.78045
JOCPIB	26.4353	39.5585	2.58872	3.51546
NEYBEZ	26.4408	9.32823	3.8906	4.95206
NIKYOW02	26.5692	11.9462	3.68194	4.72463
ZEJCUO	26.5851	48.1767	2.60004	3.4618
QOMFAA	26.596	18.7728	4.20957	5.35735
EXOZEX	26.8625	8.28014	3.02039	5.85437
EBIPIQ	26.8747	59.0149	2.76098	3.95804
GIFFAE	26.9207	161.603	3.25577	5.12876
NIKZEN01	26.9303	11.132	3.71164	4.86464
GUPBOJ01	27.4433	15.0737	3.8895	5.5554
XEHSAF	27.5642	14.2499	3.65952	4.88747
HIWKEE	27.8169	23.5886	3.90302	5.3362
REYBAA	27.8834	24.9672	3.50951	4.19945
RAVVOA01	27.8935	13.5147	3.65894	4.63178
WEMDAV	28.1248	32.3632	3.48688	5.02432
LIFWEE	28.1575	16.4055	3.86694	4.94583
ZAVMIU	28.2144	16.6448	2.90422	5.45393
TEVZEA	28.2466	16.7946	3.52297	4.59329
RAVVIU01	28.6077	13.5231	3.5679	4.59869
UBACOR	28.6349	25.5454	3.33609	5.7806
AHUTIH01	29.3633	34.0557	3.24781	4.18118
GAWJEV	29.3662	13.003	3.38284	4.86365
FAWCEN	29.519	13.9436	3.26381	11.3269
CIQYUX	29.557	14.2089	2.60872	3.59028
NAXVOY02	29.6985	33.4189	3.68126	4.76846
TEVZIE	29.7625	14.6139	3.64059	4.89772
TESGUU	29.7805	15.2758	3.58268	4.82436
UTUMAY	29.7943	74.2978	3.06783	4.48241
MOGYAI	30.4558	35.3071	3.28293	4.73161
ZIGWUJ	30.68	20.7326	3.34297	5.41641
XADFAL	30.7415	31.1955	2.96961	4.26653
GULPIN	30.8277	25.4396	3.49743	4.25802
BEPVOJ01	31.0193	24.6806	3.97854	5.12362
ODAJAG	31.1072	24.358	3.25151	4.17677
HIBGEF	31.116	34.7774	3.60956	4.68206
HAJLEK	31.1361	39.5095	3.45438	5.87742
HIFVUO01	31.1499	17.4431	3.29929	11.7128
PEGQUP	31.4469	22.3342	3.49069	4.99244
COYVAO	31.4474	35.9807	3.28007	5.01094
LUKRIS	31.6787	24.7287	4.10534	5.16354
GIZJOP	32.0369	34.4343	2.78115	5.3179
CAWGAJ	32.0515	23.2806	2.95239	5.29963
WOPDEL	32.2796	20.0246	4.03658	5.48028
HAJLOU	32.4009	40.8442	3.5289	5.886
EXUMOZ	32.5185	40.8363	2.99752	3.8372
XOBXIW	32.754	17.1226	3.51548	4.67713
XEJXAN	32.7549	32.1457	3.60567	4.27901
FUZKAN	32.8026	14.8365	3.23595	5.06549
CAWZUX	32.8461	25.276	3.15287	4.75634
DAJHUS	32.8515	21.8066	3.20599	4.35025
MODNIC	32.9034	44.5629	3.69522	5.24657
DAPXEZ	33.0051	16.3904	3.282	4.82667
FASQUN	33.2553	21.6237	3.03904	5.13227
LIDZUV	33.6419	41.0547	3.77339	5.12552
QARTAG	33.6854	73.6275	3.02862	4.89851
CAKXIX	33.7398	20.7045	2.81759	4.13408
IZEHAX	33.8728	28.3512	3.14826	4.457
JEMNAR	33.9431	77.6437	3.17172	5.0633
GITTOT	33.9783	32.1197	3.07343	11.4137
SEYFAE	34.1356	9.36003	3.30607	4.13987
EKEQIV	34.2239	26.0538	3.45461	5.23981
QOXNIB	34.2586	40.0953	3.61253	4.25979
CAKYAQ	34.3201	26.5948	2.78322	4.08997
KAVKIC	34.3548	23.5224	3.4738	5.02071
POVXII	35.1243	31.2813	2.81232	4.522
PEGPUO	35.564	25.1751	3.11785	5.11559
ENUCOG	35.6226	32.1586	3.25846	4.91468
GEGSIW	35.9364	59.3835	2.85269	7.85146
AFOQUI	36.2142	12.1474	3.00568	4.25157
CAKYIY	36.3293	29.8051	2.74254	4.02936
SETXAS	36.4761	38.2413	3.02112	3.80992
CAKYEU	36.559	30.1884	2.75795	4.05316
EVOHOM	36.5665	40.7496	2.65551	3.57984
HOJLEY	36.6795	18.0464	2.83052	3.63337
EMICUZ	36.9071	11.8349	2.53854	4.0744
FEJKEM	37.2912	23.9065	3.08881	3.45598
LABGAY	37.4924	30.1675	3.23821	4.46512
XAXQEU	37.9216	23.6206	3.21043	4.2322
FASJAL	38.4392	57.0124	2.75862	3.2844
MIHHUG	38.4572	44.0508	3.29973	5.15935
IDUDES	38.5346	62.1437	2.97646	4.4794
VAQLAC	38.5719	28.0064	2.78544	3.80978
VOTMAS	38.9233	22.1693	2.95777	4.44531
XIMPOA	39.1865	40.8024	2.99963	3.66828
XINJAH	39.4225	37.3359	3.21135	5.1973
TEJQAC	39.4564	34.8515	3.19439	3.76144
MAJHOW	39.7861	20.4158	3.2085	5.19955
HORCOH	39.7986	73.1756	2.55379	3.95095
GITTOT01	39.9296	28.6244	3.10209	11.4006
YASNAJ	40.1664	55.0322	3.22962	5.78381
GIKMOD03	40.171	30.6616	2.50215	3.92289
AMUCOB	40.3321	35.295	3.31743	4.03909
COYTUG	40.3643	28.6181	2.93224	4.86988
QUVDOB	40.5379	41.6187	3.19827	3.95151
YEZKIZ	40.5635	39.8099	3.34196	5.88797
QUVFAP	40.699	65.7369	3.20053	3.97696
FAFJIH	40.8149	26.9153	2.55624	3.61922
HAKCIG	41.3547	19.5979	2.97433	5.39588
ZEFVOX	41.4927	63.7516	2.50004	5.14664
PEGQAV	41.5279	22.2702	3.15291	5.14547
XAKQIL	42.0128	377.329	2.67531	3.43867
COYTUG01	42.4366	52.8866	2.85255	4.85681
NABNUA	42.4952	29.4462	2.88021	4.40845
BIVXEK	42.6212	35.7786	3.13827	4.38344
PEGBEK02	42.9956	20.5539	3.47614	4.27091
IHIWIF	43.486	34.2126	2.56403	4.71706
CETVAA	43.5726	26.0739	3.28831	4.44677
DEGJIK	43.6161	29.4855	3.8442	4.49857
ROSCEH	43.699	31.1934	2.78001	5.64584
PEGCAH	43.7923	22.594	3.55963	4.41751
OFERUN03	44.0169	27.1224	3.40962	11.4629
YIWMEW	44.1558	26.262	3.80264	5.71951
HELCUY	44.3341	40.8019	2.60112	3.75849
PEJRON	44.4136	37.9585	3.03358	3.5787
QALNEW	44.6609	44.0086	2.74105	3.78403
WOCVUG01	44.6977	24.2701	3.41671	4.33403
PIGXAF	44.8943	22.4672	2.94053	4.48463
QATRAG	44.9575	74.8317	3.21676	4.21344
ETUWOG	45.3165	28.942	2.63619	4.3132
KAXQOR01	45.4039	62.8236	3.66075	4.99192
GIKMOD05	45.5064	29.2976	2.53368	3.93179
XOVVEK	45.8173	38.425	3.32854	4.5587
GEGWAS	45.8658	35.1301	3.17954	5.44742
DUFZOU	46.116	28.1834	3.0854	7.15398
FUYYAA	46.316	26.7186	2.50265	4.5706
WIDZOA	46.4031	37.7137	3.17117	4.22629
XIPBII	47.2834	57.2329	3.16573	7.09224
FEVDIV	47.2851	61.3086	2.53303	4.11804
OVIDON	47.7139	26.1738	2.81637	4.40281
GIKMOD06	48.0465	28.3905	2.5601	3.96173
GIKMOD07	48.0465	28.3905	2.5601	3.96173
PEFSEA	48.1269	38.8313	2.87938	4.38811
XAKRAE	48.1758	455.491	2.61921	3.51244
HEBTAL	48.1934	87.5448	3.03297	4.70614
QUVDUH	48.2164	46.4742	3.20462	3.94913
PEGBEK01	48.6775	22.6141	3.43767	4.25489
YUJNOH	48.9938	41.7877	3.46452	5.27714
EKARUE	49.0674	56.3405	3.20781	4.2283
DIBPIP	49.2603	35.2205	3.33216	4.52354
GUPJEG	49.3143	33.4	3.38841	3.71266
ZEGSUB	49.649	30.0984	3.30813	7.31541
NUVYIN	50.5795	28.947	3.39858	5.06465
NIRDOI	50.5929	42.3387	2.74753	3.72517
CITXUZ	50.6235	19.4853	2.7632	5.80705
XOQXEH	51.5004	21.4769	3.13265	5.17553
BEPVAV	51.8582	47.4813	3.25406	4.46396
FIGQUJ	52.0946	42.5856	2.87726	4.99341
KAVTUY	52.7322	31.8038	4.08985	5.22962
DEYJIC	53.1828	49.7511	3.79158	5.18714
TAFBIN	53.2853	36.6372	3.22691	4.89948
GUJVOX	53.2983	40.9618	2.74095	3.98106
CUGLTM	55.3619	66.795	2.69075	3.17988
GIKMOD11	56.0589	45.814	2.61268	3.92028
ZNGLUD01	56.2832	25.6638	2.59565	3.16473
GELVEZ01	56.6873	38.3296	2.63566	3.8103
QEZZIF	56.7217	33.2051	3.32799	4.67652
RAXDAX	56.7773	34.008	2.80345	3.78
OFERUN02	57.1488	40.6333	3.12691	11.4294
BARZIE	57.6555	45.2157	2.59337	7.74818
ITIBET	57.9902	39.6183	2.8532	4.61324
LIRTEM	58.3245	57.594	3.08988	4.39679
COYTEQ	58.453	78.3638	3.37897	3.8382
XEHSUZ	58.648	37.5891	3.78928	4.73753
YUJNIB	58.6664	39.0635	2.59839	3.94507
MUFJAZ01	58.6885	73.7497	2.67319	3.39058
OCIVIH	59.0153	45.7604	3.22991	7.04533
XEHSIN	59.5584	40.9195	3.64676	4.81303
LIHSIF	59.7182	54.8732	2.5942	4.51896
XEHSEJ	59.7973	37.6221	3.85188	5.24127
TAFCIO	60.4555	45.4696	2.87014	5.00686
UNIPAJ	60.5383	79.0441	2.61552	4.43325
FALJAF	60.6299	105.815	2.60346	3.79701
HAJLIO	60.8902	41.3003	3.51824	5.88281
EHUCOA	60.9328	52.2628	3.25891	5.17903
WAHREE	61.0525	64.3583	2.85009	4.96921
GELVEZ	61.0743	47.9516	2.61776	3.84426
JEJKEP	61.232	38.3238	2.80032	5.0932
VODPOU	61.2914	39.0493	2.86572	4.01882
GIKMOD02	61.3876	30.552	2.51015	3.9282
ILUHON	62.0152	82.1779	3.09029	7.0969
REJVOS	62.1353	37.5853	3.67275	4.89378
XEHSOT	62.1705	41.8254	3.63666	4.76348
ADABIS	62.3345	58.2262	3.05346	3.98906
UZAFAD	62.6947	20.7284	2.53482	4.26412
VAGKOF	62.6964	40.7413	2.62002	5.16963
PUQHIT	63.4826	31.2938	2.80454	4.11931
HAZNON	64.0939	74.6886	2.60838	4.92903
VAKBIU	64.2424	59.0639	3.81153	5.76642
KAXZUG	64.3169	52.8648	2.59156	4.51369
WOHZAU	64.3754	41.5651	3.1609	5.02471
TETWOG	64.4261	56.8622	3.07417	3.76455
HUTTIA	64.7838	41.2061	2.94896	4.93965
MAKSUO	64.9704	46.9742	2.87742	3.81372
HEDCEA	65.1474	55.5526	2.92557	4.7556
MIHHOA	65.9704	103.106	3.21821	4.98547
FECWOB01	66.0432	56.6882	3.04516	4.17085
HEDTER	66.3503	51.1833	2.7809	4.77494
GIKMOD10	66.4905	44.7901	2.59885	3.94696
CILDAD	66.6114	61.8688	2.50478	3.07453
VAJTUX	66.7545	12.885	2.91526	4.46543
BARZOK	67.1582	44.5069	2.7399	7.65896
HORCUN	67.5335	88.1096	2.58122	3.98209
PAZXUJ	67.5712	22.0053	3.12538	3.82629
BARZAW	68.9205	56.2062	2.55685	7.73837
TUVDIX	69.7347	63.7265	3.21232	7.26897
MEHPAQ	69.9042	34.4858	2.64049	3.09554
KIFKAM	69.9992	48.5147	3.04859	4.32056
IJENER	70.0029	73.2685	2.57734	6.00155
WOCVUG	70.223	87.9033	3.56283	4.37067
LUTCAF	70.838	45.2332	2.5592	3.90986
BONNIC	71.0062	119.912	3.03382	4.09843
WALBOC01	71.2514	19.2849	2.9953	4.21583
XALTOV	71.3246	132.244	3.00948	12.1705
CEFLEF	71.3288	69.0486	3.11475	7.24143
LUSZOP01	71.9928	42.2555	2.56857	3.94583
CUGLTM01	72.2238	77.1852	2.6439	3.16369
KIYMAI	72.3037	41.7772	2.95812	3.94719
LERNEC01	72.4334	44.3676	2.64138	4.91469
ZEFVIR	73.0443	68.9649	2.5027	5.15122
XEHFUL	73.2116	34.6979	2.60046	4.30377
JASNEX	73.5982	92.5928	2.72372	3.25557
GIKMOD09	73.8547	50.326	2.58011	3.94339
IBOTAU	74.3275	46.3437	2.91754	6.68004
ZNGLUD	74.5275	57.5861	2.66271	3.19455
FOHSAW01	75.2647	79.7596	3.30187	4.19352
ILUFIF	75.676	111.353	3.09218	7.09777
CAHSOU	75.7308	54.5125	2.77879	4.04164
NAPFOA	76.4668	40.2836	3.96344	5.40777
NIVNOW	76.9823	245.381	3.10602	4.9886
CUKXOW	77.7086	34.8778	4.27142	4.70734
LUSZUV	77.7136	42.4371	2.56912	3.94192
OPENIH	78.117	53.4	3.18264	3.75861
KAVRIK	78.1768	40.0505	2.9714	5.59809
GIHPEU	78.2998	73.6388	3.28751	6.0987
JIQVAH	78.783	45.0219	3.31132	4.60365
IQIPAZ	78.9617	22.1417	3.36787	5.68593
GETXAG	79.5947	41.012	2.61071	3.33124
NIVNUC	80.0642	64.7687	3.15608	5.02349
MAZJEC	80.0822	82.7624	2.93292	5.75047
PIHNUQ	80.4901	79.3136	3.62057	4.36505
ESIPUR02	80.501	55.8903	2.81655	4.9703
NAPFOA01	81.0985	49.5888	3.98305	5.31373
NERVOV	81.2704	45.0077	2.77559	5.20555
NERVEL	82.1813	53.3753	2.50642	4.91794
VARREL	82.3064	69.9728	3.2556	6.17066
LUSZIJ01	82.4164	37.7522	2.57303	3.93885
GIHPAQ	82.5432	95.0078	3.20702	6.0679
LUTCIN	82.7089	34.264	2.5461	3.89894
ILUFOL	83.4582	116.445	3.06586	7.10596
NABCIE	83.6729	65.3624	2.59798	3.55623
ZETQEW	83.7252	64.4918	2.73604	4.43317
XIPBOO	83.7762	114.524	3.03689	7.07279
KOMHAW	84.3411	52.1883	2.83423	4.30719
PEXBIF	84.4519	32.6775	3.2242	4.0229
SAKDEP	84.5214	55.6326	3.20042	5.60133
ZETPUL	86.249	63.1173	2.77473	4.3933
FAHTUE	86.2824	88.4205	3.1424	7.2202
GUPJEG01	87.2669	34.623	3.35645	3.68475
HEFDIH	87.9079	59.5668	2.61069	4.92199
IFEPIT	88.3736	15.2954	2.50502	3.789
YEZKOF	88.8602	98.9516	3.28691	6.11466
EVUNIT	89.038	73.1162	2.62968	4.36696
GIKMOD08	89.0723	47.9838	2.56651	3.94198
KAVROQ	89.2138	48.0344	2.87136	5.56636
DOHYIJ	89.692	80.4654	3.118	3.65608
CERMIV	90.3351	96.8366	3.15163	6.14808
VEJYUF01	91.253	55.2748	2.60028	5.23877
XUNJIA	91.5794	161.657	2.86382	3.16551
BIBBUL	92.2576	38.7271	3.31702	3.85878
MODDEP	93.1216	75.971	2.69903	3.3093
ECUCIP	93.2312	56.3083	2.64336	3.79378
TEWFUY	93.4371	13.7967	3.76853	5.12402
NUCREJ	93.4488	42.1392	3.35735	4.13308
GIKQIC	94.3743	100.943	3.47181	3.78387
DAGDIZ	94.394	58.0492	3.58733	6.53637
HIDMEO	95.0684	84.1888	2.55733	3.70259
IVARUT	95.0927	113.622	2.98662	3.98401
FAHVAM	96.278	78.0149	3.20421	7.31279
ILUJIJ	97.1734	68.4795	3.15378	7.16071
TUVDOD	97.3157	120.098	3.14901	7.2437
KAVREG	97.7583	43.0785	2.83796	5.54039
QOPHEI	97.9612	96.0479	2.56912	3.51928
YOPMAS	98.637	34.61	2.78834	3.73773
COXQUB	98.6416	74.0501	2.84337	3.99789
QIFLIC	98.7633	88.3368	2.79398	5.58826
GINDEO	99.7633	64.4336	2.70694	4.38238
FIHLOZ	101.326	124.186	2.95224	5.07016
YEYYAC	102.089	31.9361	3.00875	6.35432
TUVDUJ	103.157	150.833	3.15351	7.30526
SESDEA	103.766	99.1725	2.67675	3.28889
FELVOJ	103.859	65.8545	2.59168	5.97797
EVUNEP	103.945	55.9945	2.63132	4.38284
LEVYOC	104.019	19.0234	3.53475	4.43687
FERVOP	106.428	90.2049	3.11713	4.39579
CAZFOA	106.94	39.7702	2.95907	3.89004
ZETQIA	108.143	66.6034	2.70419	4.38937
PEFTAX	108.52	48.7633	2.87105	4.53798
WALCET	108.647	137.979	3.07523	4.22225
XEXNEV	108.7	84.331	2.62071	4.91208
ZIJVAR	109.545	55.71	2.63372	3.81019
IPOWOA	110.215	115.1	2.83702	4.16556
PASNEE	111.128	90.7355	2.83674	4.1572
OGIYAF	111.311	101.105	2.65637	4.13022
IWEPUW	111.721	99.6169	2.51109	3.20048
ELIKEQ	111.965	46.7294	3.80728	4.99766
EJEFOP	112.704	60.5885	2.84987	4.0642
ILUHUT	114.801	71.0443	3.21073	7.11344
CUYVOI	114.954	91.3576	2.63151	4.52428
FUFREE	115.081	156.595	3.09275	3.74304
KOLWEO	115.131	98.7955	2.59235	4.80101
ILUJEF	116.75	72.2117	3.13122	7.09377
XUWVEQ	121.72	257.359	2.7861	3.87598
CELZIE	122.556	93.1007	2.63187	5.88328
MECLEL	122.958	76.5927	2.85573	6.56223
BEKSAM	123.023	924.978	3.3801	4.03684
FELVEZ	123.466	75.8187	2.53239	5.91981
EVEGER	125.39	47.1562	3.24345	7.46813
MAYPIM	125.622	106.854	2.65055	4.30951
FULQOT	126.246	40.6672	3.50634	5.67142
WOWHAR	126.921	95.6571	2.65556	4.10947
UNEBIZ	127.889	101.524	2.99503	5.60217
HAOAER	128.514	106.67	2.51122	3.28684
GEVKID	129.201	74.3949	3.02065	4.59038
FELWIE	129.45	79.2044	2.50992	5.9068
XUNJOG	130.219	98.8721	2.67373	3.24837
UBACUX	130.307	129.66	3.40268	7.27569
EZUCOS	130.983	40.4936	3.17302	6.21547
PASKAX	131.832	57.7095	2.83696	4.533
TAKYEL	132.398	125.825	3.12698	7.08036
XULCIR	133.202	79.0366	3.17631	4.97155
DUXKEN	133.207	107.165	2.66706	5.19652
WUZRUE	133.323	28.373	2.62616	4.22154
MAQZOV	133.366	90.3175	2.59641	3.79529
WALBOC02	133.78	121.566	2.99285	4.1969
WEWGAH	133.804	60.8144	2.55363	3.68933
XENMOU	134.234	25.1714	3.44611	4.29825
GAWBEM	134.54	90.9581	2.72795	3.68052
ILUGOM	135.516	97.1023	3.07068	7.1541
UBOGAV	136.624	103.898	3.09037	5.07523
XOJCUV	138.419	203.072	2.50912	4.0943
LUPHIN	139.078	74.3321	2.56897	5.12922
FIYDOH	142.902	155.521	3.85906	4.62011
LUTBUY	144.086	134.818	2.5829	3.93905
ECORIX	144.163	151.105	3.03659	3.90772
ILUGAY	144.653	107.939	2.93792	7.03145
QUPDEL	146.158	120.256	3.89395	4.30346
YICGOI	146.628	132.145	2.62761	5.21305
YAPYUK	147.025	94.3145	2.51848	3.81265
KEQZAJ	147.05	59.2856	3.11001	4.82685
OJAKUG	147.407	222.112	3.17471	3.99498
QUKYOL	149.174	143.894	2.89067	4.31995
DUGBAJ	149.992	144.963	3.05086	7.13438
LALPIZ	150.948	14.1336	3.30829	4.79448
GIKMOD	151.36	43.5157	2.55442	3.93708
KIFXOO	151.686	134.167	3.02702	4.97615
TAKYOV	152.001	80.5043	3.04881	7.07022
IXURAV	152.743	99.6675	3.9269	4.70928
AMIKOX	153.612	146.309	2.69518	3.46941
EXIDEV	153.741	137.728	2.86096	4.20107
WOWHEV	154.019	117.68	2.59845	4.07173
LUTBEI	155.206	107.203	2.55814	3.92652
KAFTUI	155.51	112.405	3.11952	5.18489
DOTWAL	156.146	42.9806	3.24941	6.26428
ECUCUB	156.705	218.996	2.8656	3.57107
QUKYUR	165.133	144.017	2.88893	4.2216
DODHUA	165.562	110.208	2.64299	3.82979
KIBDEF	165.828	131.578	3.92279	4.31905
LUTCEJ	165.959	110.179	2.58728	3.9269
TIQGEG01	166.946	285.918	3.07037	3.98024
BERFIP	167.32	167.994	2.71437	4.07847
ILUHIH	168.159	78.6508	3.05989	7.14256
WICQIJ	168.873	445.78	3.08082	4.1309
PAPXUB	169.654	115.298	3.74838	4.14867
WALBOC	173.186	111.224	2.9644	4.17363
XUYDIF	174.555	104.252	2.90765	3.88622
YEZKEV	176.828	106.31	3.43415	5.97739
GEHSAN	181.321	171.843	2.65292	4.21897
AXUHIL	183.641	149.84	3.3542	5.52712
DEYXIQ	186.58	150.908	3.32439	4.50777
DUFZUA	187.757	114.955	3.11961	7.17076
KILFUI	189.585	19.3573	3.53409	4.59875
TOHPUC	189.755	207.62	2.51178	4.09389
VONBUW	191.781	141.664	2.90353	4.78685
TESHAB	203.092	147.93	3.84947	5.24315
GAXGIX	206.428	47.4541	3.1306	4.87192
NARTIL	208.049	54.0288	3.84842	4.48691
XAPYAO	215.575	174.544	3.04724	4.15939
HURQUG	217.172	72.7782	3.21738	6.31221
ELILER	218.616	120.195	3.66982	4.98078
ELIJUF	219.47	121.433	3.63869	4.98722
RATDAS02	226.992	187.559	3.63147	4.66068
CEGWER	227.546	199.137	3.87534	4.43901
GEPDIQ	237.614	51.6096	3.20855	4.79078
NOFQII	250.004	237.492	3.25534	6.19412
NIKDIU	258.593	171.46	2.52089	3.57373
CAKXET	258.604	364.708	2.82776	4.14523
CAKXOD	262.037	266.581	2.79775	4.11875
NAXVOY01	273.671	198.642	3.67769	4.75058
MAPFOY	274.457	237.414	3.38698	4.52682
RAVVOA02	279.454	218.741	3.65202	4.70077
SEYFEI	282.793	40.7421	3.18681	4.05966
KEXPOU	284.463	254.591	2.7409	4.06064
ICANEH	306.465	348.111	2.8069	7.44304
BAKLIK	309.693	146.276	2.89089	6.44441
ROJNEJ	324.883	200.542	2.77756	4.01951
ESIPUR	332.487	310.956	2.80803	4.97103
FELWAW	333.948	297.1	2.50204	5.88664
GAGXAP	349.698	265.475	2.84597	5.16363
FIRVEH	368.376	209.975	3.26577	4.11749
POXHOA	370.805	1159.54	3.29845	3.6953
UJAQAY	374.075	192.058	2.81383	3.85934
EYULOA	465.466	337.466	3.99192	4.93073
WEBREC	505.632	133.839	3.78553	5.39661
PEGBUA	507.251	426.417	3.44241	4.24178
BONWAD	509.502	379.09	2.72512	3.83514
LEMNOH	560.451	341.686	3.09524	4.05561
TIQGEG	582.614	481.378	3.05406	3.99152
MIJYEK	704.519	578.819	3.22254	5.3671
XEJTIR	749.597	375.048	2.90436	4.61538
OJAKOA	751.965	82.2156	3.37132	4.13561
LACGED	996.453	441.102	3.44165	5.2733
XUZDUS	1005.76	799.918	2.99465	4.25337
EBANAY	7462.67	75.4764	3.18083	3.59235

## Sheet: 505 both NEB setups
CSD refcode	propane, kJ/mol		propene, kJ/mol		porosity descriptors
	1st NEB	2nd NEB	1st NEB	2nd NEB	Df (Å)	Di (Å)
	setup	setup	setup	setup
NATXIR	0.170707	8.10357	23.1174	37.9673	3.18308	3.61932
ILUJAB	1.06692	7.12535	25.9492	32.0704	3.19958	7.14322
ILUHON	1.85351	62.0152	43.7061	82.1779	3.09029	7.0969
NAQLAT	2.41584	6.79021	6.55968	6.9287	3.53855	6.1178
FERVOP	3.90367	106.428	2.95516	90.2049	3.11713	4.39579
UMUTOM	3.94133	15.3335	7.26886	30.4737	3.31267	4.23207
NANMEW	3.99154	9.24664	2.12129	3.50201	3.30498	7.12956
AXUBOL	4.09655	16.2335	3.55556	7.48016	4.2994	7.86111
HEKTUO	4.34718	17.6933	5.98772	58.6986	3.27438	4.58935
TEWFUY	4.51035	93.4371	13.5896	13.7967	3.76853	5.12402
VIPYOK	4.96641	9.12698	13.2783	20.7639	3.89151	4.56016
DUFZOU	5.61493	46.116	13.6189	28.1834	3.0854	7.15398
YARBUQ	6.40068	25.1362	7.26803	8.33202	4.03616	4.67624
GEGSIW	6.72369	35.9364	11.234	59.3835	2.85269	7.85146
KILFUI	6.92494	189.585	26.5462	19.3573	3.53409	4.59875
AZILEA	7.44919	11.9809	3.17984	36.1849	2.70328	4.19485
PEJRON	7.82073	44.4136	25.0789	37.9585	3.03358	3.5787
PEXBIF	8.6387	84.4519	11.273	32.6775	3.2242	4.0229
QEVKOS	9.2458	8.1111	14.1499	7.06887	3.94029	4.71244
KETHEY	10.2048	11.4361	7.60944	7.32618	3.58603	5.2876
YEZKOF	10.6328	88.8602	8.05462	98.9516	3.28691	6.11466
LUTDAG	11.4068	25.5165	27.3508	45.3006	2.54566	3.89478
MAHTAR01	11.6232	11.547	6.70612	11.0386	4.14932	5.34764
CODFEH	11.6236	11.5784	8.62197	63.6114	3.49285	3.78989
YEZKEV	12.3696	176.828	4.97854	106.31	3.43415	5.97739
LEMVOP	12.7235	11.5939	11.2842	30.7691	3.76828	5.28106
TEHRUU	13.2327	19.8907	26.3048	67.3574	3.65221	4.78045
XOVVIO	13.4905	14.9143	0.963575	9.3186	3.10979	4.51219
ITIBOD	13.5725	19.2079	9.26714	7.51781	3.48306	4.51038
QUPDEL	13.8135	146.158	64.9591	120.256	3.89395	4.30346
GIFFAE	13.9223	26.9207	16.0992	161.603	3.25577	5.12876
RETBEZ	14.2762	10.7374	10.0366	10.7378	3.74465	5.70035
YIWMEW	14.2928	44.1558	15.3025	26.262	3.80264	5.71951
COXQUB	14.4164	98.6416	23.5961	74.0501	2.84337	3.99789
VOCNOQ	14.5135	23.4237	26.3726	32.0248	3.2968	4.9916
NEJSAY	14.6616	19.1799	10.0483	26.2149	3.73257	4.50943
NEJSIG	14.7314	19.2577	11.4767	50.0557	2.69394	3.52077
QOMFAA	14.8402	26.596	16.1536	18.7728	4.20957	5.35735
GIFFEI	14.8678	25.9747	10.4951	54.7748	3.23803	5.10703
EKEQIV	15.0411	34.2239	7.73956	26.0538	3.45461	5.23981
KANMIX	15.136	13.929	6.87724	7.52158	3.95127	9.77148
UJAQAY	15.4808	374.075	106.06	192.058	2.81383	3.85934
ODOXEK	15.8197	15.5728	8.97886	8.79058	4.24424	5.23174
PUWCUF	16.0753	13.9336	8.09981	8.63619	3.92719	5.62914
AVIMUO	16.2009	18.9682	4.71913	43.9479	3.6399	5.70679
GAWKEW	16.3657	23.1262	7.11406	10.8617	3.14287	5.75147
EQOCES01	16.5435	13.5854	15.9787	13.9495	3.12659	5.48857
MIZKOW	16.5553	21.5974	2.1125	18.2866	3.43471	3.8316
AFOQUI	16.6854	36.2142	20.8418	12.1474	3.00568	4.25157
MAHTAR	16.7586	18.0243	7.181	12.3277	4.13773	5.34824
HIFVUO01	16.7904	31.1499	14.2591	17.4431	3.29929	11.7128
NETFAU	17.213	20.2263	7.01657	11.6269	3.37252	5.9815
EPUXET	17.2439	19.3631	13.4043	14.0549	3.26125	4.89022
YELYOE	17.3213	17.3167	10.6889	19.6204	3.59258	5.04252
ORAGEU	17.607	16.7564	5.20682	9.25413	4.14776	5.42928
RIDGIW	18.0075	18.6807	11.2943	10.9056	3.52892	5.01403
WIDZUG	18.2908	16.2105	14.9356	12.1227	3.48109	5.41352
POKGEC	18.5908	17.6021	18.1996	14.4482	3.87743	4.44927
VAKBIU	18.6954	64.2424	30.1474	59.0639	3.81153	5.76642
GIHPEU	19.1029	78.2998	15.4214	73.6388	3.28751	6.0987
GULPIN	19.2937	30.8277	16.3289	25.4396	3.49743	4.25802
CABQEB	19.3008	13.8842	14.8135	15.2867	2.70603	3.76405
NIVNUC	19.564	80.0642	22.2693	64.7687	3.15608	5.02349
HAJMEL	19.5912	17.6284	10.8797	17.7966	3.62462	5.95786
VIPXUO	19.6125	22.1769	53.2724	65.1018	3.23579	4.31173
EWIDUK	19.6133	13.4666	12.7093	17.8535	3.18631	11.3903
REYCOP	19.8949	23.586	12.6035	14.7678	3.16913	3.95649
APEBED	20.1117	19.8991	9.55835	21.2568	3.62787	4.58202
FOHQUO	20.192	21.7714	15.567	17.1837	3.45753	4.34506
BAKGAX	20.4932	24.8697	36.6853	47.6934	3.05498	4.24107
OVIDON	20.615	47.7139	17.0406	26.1738	2.81637	4.40281
HIYZEV01	20.802	5.75216	14.7879	22.4957	3.19057	6.77675
INURIS	20.9012	22.6949	1.93761	13.5524	3.09799	5.07769
EBIPIQ	20.933	26.8747	17.7791	59.0149	2.76098	3.95804
XIPBII	20.9618	47.2834	9.5186	57.2329	3.16573	7.09224
DIBPIP	21.12	49.2603	23.7856	35.2205	3.33216	4.52354
FAWCEN02	21.156	22.325	16.7193	10.0094	3.44691	11.4225
CIQYUX	21.2451	29.557	14.9649	14.2089	2.60872	3.59028
RIPTAM	21.5522	21.3606	11.2709	8.03537	3.16505	5.57227
XAKQIL	21.8007	42.0128	127.05	377.329	2.67531	3.43867
SEYFAE	21.8727	34.1356	5.72999	9.36003	3.30607	4.13987
LUKRIS	22.0815	31.6787	8.78807	24.7287	4.10534	5.16354
CETVAA	22.1626	43.5726	25.0596	26.0739	3.28831	4.44677
XENMOU	22.1919	134.234	31.4829	25.1714	3.44611	4.29825
UBACOR	22.4099	28.6349	26.2303	25.5454	3.33609	5.7806
CAWZUX	22.4329	32.8461	19.9372	25.276	3.15287	4.75634
SETXAS	23.0317	36.4761	26.4688	38.2413	3.02112	3.80992
WALBOC01	23.1371	71.2514	17.7891	19.2849	2.9953	4.21583
UNIPAJ	23.1919	60.5383	31.3926	79.0441	2.61552	4.43325
NIHBEM01	23.3961	23.2208	11.2558	12.2256	3.68372	4.87963
NEYBEZ	23.517	26.4408	0.174473	9.32823	3.8906	4.95206
DEYJOI	23.6576	22.666	18.9447	23.6455	3.64055	5.20142
EXOZEX	23.6927	26.8625	9.73659	8.28014	3.02039	5.85437
NIKYUC02	23.8605	22.8057	9.24371	9.94537	3.78234	5.06856
YEZFIU	23.8739	23.4722	10.8198	12.075	3.87237	7.76134
NIHBIQ02	23.9597	21.8321	9.51944	10.0726	3.95166	5.38184
YEZKIZ	24.2659	40.5635	20.4037	39.8099	3.34196	5.88797
RATCUL01	24.2718	23.0179	9.67759	9.63492	3.6752	4.69215
WEMCEY	24.3049	20.2255	16.2967	17.7987	3.5623	5.09454
WEMCIC	24.4806	21.4304	16.987	17.6397	3.47331	5.03643
NIKZEN02	24.5722	24.1233	10.4466	10.4855	3.78699	4.94738
MODNIC	24.6464	32.9034	10.5451	44.5629	3.69522	5.24657
CDLGLU10	24.7735	23.904	27.6964	25.9211	2.76994	3.40131
FAWCEN01	24.8304	25.3182	22.2078	21.6083	3.32888	11.3331
UMUTUS	24.9458	25.04	15.5143	15.0381	3.20383	4.6588
RATCUL03	25.1216	22.5271	9.49308	9.34998	3.7831	4.74713
NUCREJ	25.3483	93.4488	31.0838	42.1392	3.35735	4.13308
GUJVOX	25.4601	53.2983	18.7983	40.9618	2.74095	3.98106
GIKQIC	25.4776	94.3743	22.2785	100.943	3.47181	3.78387
DIZQOT	25.7852	24.4689	17.3695	24.3731	2.72478	3.46252
VAJTUX	25.791	66.7545	23.3886	12.885	2.91526	4.46543
FAWCEN	25.8751	29.519	23.7739	13.9436	3.26381	11.3269
COYVES	25.8764	23.8111	28.5663	28.734	3.06175	4.87211
RASXIT	25.9534	19.5184	17.4724	13.9913	3.51139	5.08501
KIYMAI	26.0538	72.3037	19.2171	41.7772	2.95812	3.94719
PEGQID	26.1416	21.1669	17.5393	19.7778	3.46018	5.05756
NIKZEN01	26.2638	26.9303	10.7926	11.132	3.71164	4.86464
RATCUL02	26.3195	22.6133	9.9801	10.3759	3.72749	4.70959
COYVES01	26.4395	22.056	20.6786	65.5373	3.01821	4.8567
NIKZEN	26.4768	24.6986	10.2947	10.5048	3.70751	4.82301
PELXIP	26.6157	25.5705	12.7386	11.5901	3.66818	5.04305
HIWKEE	26.7044	27.8169	23.1107	23.5886	3.90302	5.3362
PEGQOJ	27.0161	24.9492	19.8071	19.7066	3.45218	5.06893
FUYYAA	27.1881	46.316	23.7204	26.7186	2.50265	4.5706
WICQIJ	27.2362	168.873	13.3834	445.78	3.08082	4.1309
DAJHUS	27.2387	32.8515	21.4208	21.8066	3.20599	4.35025
ZIJVAR	27.4554	109.545	13.5185	55.71	2.63372	3.81019
NIKYOW02	27.4567	26.5692	10.9144	11.9462	3.68194	4.72463
TISKOW	27.4801	25.6437	17.4368	18.1916	2.95571	6.20375
GUPBOJ01	27.5713	27.4433	15.3829	15.0737	3.8895	5.5554
PAPPIH	27.591	21.3041	25.8918	48.2047	2.61175	3.83347
OGUPIQ	27.5939	26.1328	5.00908	5.92622	3.53796	5.83456
NIHBEM	27.6638	25.5245	11.6696	12.2687	3.66332	4.82471
YANBAR02	27.7198	25.0638	12.0591	10.9307	3.83765	4.9953
COYTUG	27.8265	40.3643	16.3703	28.6181	2.93224	4.86988
RASXEP01	27.8278	19.9702	17.167	17.7778	3.45083	5.09989
LIFWEE	27.9717	28.1575	14.3628	16.4055	3.86694	4.94583
LABGAY	27.9901	37.4924	18.8343	30.1675	3.23821	4.46512
JIQVAH	27.9922	78.783	12.2056	45.0219	3.31132	4.60365
NIKYUC01	28.1324	24.9772	11.4006	11.3374	3.68791	4.94759
WEMDAV	28.3508	28.1248	20.5225	32.3632	3.48688	5.02432
GAWJEV	28.3884	29.3662	12.8353	13.003	3.38284	4.86365
XEJXAN	28.4353	32.7549	30.6101	32.1457	3.60567	4.27901
RAVVIU01	28.5583	28.6077	14.495	13.5231	3.5679	4.59869
EDAGAT	28.6642	25.7065	13.2486	11.9139	3.62215	4.66461
NIKYUC	28.9663	25.4437	11.242	11.4989	3.64376	4.9018
GIHPAQ	28.996	82.5432	13.8833	95.0078	3.20702	6.0679
KAVKIC	29.0244	34.3548	22.3677	23.5224	3.4738	5.02071
EMICUZ	29.0252	36.9071	12.1922	11.8349	2.53854	4.0744
FULQOT	29.2947	126.246	22.8007	40.6672	3.50634	5.67142
ROSCEH	29.5641	43.699	25.5379	31.1934	2.78001	5.64584
FUZKAN	29.5809	32.8026	11.7068	14.8365	3.23595	5.06549
GIZJOP	29.5934	32.0369	26.4303	34.4343	2.78115	5.3179
NIHBEM02	29.7194	23.1103	10.6633	9.63701	3.78432	5.01891
QUVDUH	29.7282	48.2164	31.2156	46.4742	3.20462	3.94913
NIKZAJ02	30.0587	26.2295	11.6064	12.552	3.68938	4.67382
TEVZEA	30.0851	28.2466	15.4586	16.7946	3.52297	4.59329
JOCPIB	30.0855	26.4353	47.0922	39.5585	2.58872	3.51546
AMUCOB	30.1491	40.3321	47.2796	35.295	3.31743	4.03909
FALJAF	30.2541	60.6299	41.1107	105.815	2.60346	3.79701
QARTAG	30.3152	33.6854	26.3973	73.6275	3.02862	4.89851
XEHSAF	30.5846	27.5642	14.5725	14.2499	3.65952	4.88747
MAJHOW	30.8085	39.7861	20.7539	20.4158	3.2085	5.19955
HIBGEF	30.8846	31.116	34.954	34.7774	3.60956	4.68206
MOGYAI	30.8942	30.4558	13.3306	35.3071	3.28293	4.73161
GEGWAS	31.1997	45.8658	8.82406	35.1301	3.17954	5.44742
ZIGWUJ	31.2867	30.68	19.3284	20.7326	3.34297	5.41641
UZAFAD	31.3072	62.6947	15.3423	20.7284	2.53482	4.26412
BEPVOJ01	31.4972	31.0193	26.4994	24.6806	3.97854	5.12362
TEVZIE	31.6812	29.7625	14.6072	14.6139	3.64059	4.89772
XADFAL	31.9892	30.7415	29.188	31.1955	2.96961	4.26653
AHUTIH01	32.0469	29.3633	20.8823	34.0557	3.24781	4.18118
RAVVOA01	32.0938	27.8935	13.0156	13.5147	3.65894	4.63178
NAXVOY02	32.1222	29.6985	33.5243	33.4189	3.68126	4.76846
CAWGAJ	32.3892	32.0515	24.4057	23.2806	2.95239	5.29963
XINJAH	32.521	39.4225	21.3681	37.3359	3.21135	5.1973
ZAVMIU	32.6327	28.2144	17.6297	16.6448	2.90422	5.45393
CUKXOW	32.8176	77.7086	28.1315	34.8778	4.27142	4.70734
TIQGEG01	32.877	166.946	60.2952	285.918	3.07037	3.98024
XOQXEH	32.9126	51.5004	20.6208	21.4769	3.13265	5.17553
LALPIZ	33.0394	150.948	15.308	14.1336	3.30829	4.79448
TESGUU	33.1394	29.7805	16.2933	15.2758	3.58268	4.82436
COYVAO	33.4339	31.4474	19.4841	35.9807	3.28007	5.01094
FASJAL	33.5502	38.4392	46.0002	57.0124	2.75862	3.2844
ODAJAG	33.6331	31.1072	20.2895	24.358	3.25151	4.17677
TEBCEK	33.7205	25.7613	23.9969	20.7736	2.86477	3.71564
QUVDOB	33.8414	40.5379	44.7002	41.6187	3.19827	3.95151
HORCOH	34.2159	39.7986	41.1367	73.1756	2.55379	3.95095
CAKXIX	34.3402	33.7398	19.7071	20.7045	2.81759	4.13408
XULCIR	34.3423	133.202	86.2665	79.0366	3.17631	4.97155
DAPXEZ	34.3699	33.0051	16.4737	16.3904	3.282	4.82667
PEGQUP	34.8862	31.4469	20.8447	22.3342	3.49069	4.99244
CAKYAQ	34.9582	34.3201	29.3767	26.5948	2.78322	4.08997
COYTEQ	35.092	58.453	51.7674	78.3638	3.37897	3.8382
NIVNOW	35.1812	76.9823	20.4125	245.381	3.10602	4.9886
PEGQAV	35.359	41.5279	22.0129	22.2702	3.15291	5.14547
GELVEZ	35.7678	61.0743	31.5415	47.9516	2.61776	3.84426
DEGJIK	35.9623	43.6161	25.9228	29.4855	3.8442	4.49857
HAKCIG	35.9657	41.3547	16.121	19.5979	2.97433	5.39588
PASKAX	36.0987	131.832	29.5625	57.7095	2.83696	4.533
ELILER	36.1272	218.616	6.04923	120.195	3.66982	4.98078
ENUCOG	36.1272	35.6226	21.5028	32.1586	3.25846	4.91468
GIKMOD06	36.1548	48.0465	26.4257	28.3905	2.5601	3.96173
GIKMOD07	36.1548	48.0465	26.4257	28.3905	2.5601	3.96173
PAPXUB	36.2954	169.654	36.0171	115.298	3.74838	4.14867
XOBXIW	36.3753	32.754	14.3344	17.1226	3.51548	4.67713
CAKYIY	36.4761	36.3293	30.9457	29.8051	2.74254	4.02936
CAKYEU	36.5104	36.559	30.9725	30.1884	2.75795	4.05316
HAJLUA	36.5832	23.5534	48.162	45.4299	3.59787	5.93833
FASQUN	36.8364	33.2553	20.8811	21.6237	3.03904	5.13227
XAXQEU	36.8559	37.9216	23.9587	23.6206	3.21043	4.2322
DEYJIC	36.8644	53.1828	27.8826	49.7511	3.79158	5.18714
UTUMAY	36.8728	29.7943	27.1316	74.2978	3.06783	4.48241
EVOHOM	36.9832	36.5665	45.6441	40.7496	2.65551	3.57984
IZEHAX	36.9958	33.8728	26.9429	28.3512	3.14826	4.457
GIKMOD	37.2376	151.36	5.45092	43.5157	2.55442	3.93708
SEYFEI	37.2464	282.793	7.35547	40.7421	3.18681	4.05966
OFERUN03	37.2903	44.0169	21.5258	27.1224	3.40962	11.4629
JEMNAR	37.3041	33.9431	43.7324	77.6437	3.17172	5.0633
GITTOT	37.7773	33.9783	22.5706	32.1197	3.07343	11.4137
QUVFAP	37.7911	40.699	65.6122	65.7369	3.20053	3.97696
WALBOC02	37.902	133.78	25.2881	121.566	2.99285	4.1969
POVXII	38.2468	35.1243	33.9707	31.2813	2.81232	4.522
NAPFOA	38.4844	76.4668	24.4346	40.2836	3.96344	5.40777
HORCUN	38.5568	67.5335	36.2305	88.1096	2.58122	3.98209
IDUDES	39.1074	38.5346	55.0301	62.1437	2.97646	4.4794
GIKMOD05	39.2911	45.5064	27.3169	29.2976	2.53368	3.93179
ADABIS	39.4346	62.3345	22.599	58.2262	3.05346	3.98906
YOPMAS	39.5451	98.637	34.3665	34.61	2.78834	3.73773
PEGPUO	39.6643	35.564	28.4847	25.1751	3.11785	5.11559
PEGBEK01	39.7028	48.6775	25.2007	22.6141	3.43767	4.25489
PEGBEK02	39.7957	42.9956	29.6746	20.5539	3.47614	4.27091
WALCET	39.8777	108.647	30.7009	137.979	3.07523	4.22225
VOTMAS	39.9689	38.9233	22.2505	22.1693	2.95777	4.44531
WOCVUG01	40.04	44.6977	25.9672	24.2701	3.41671	4.33403
GELVEZ01	40.1191	56.6873	31.085	38.3296	2.63566	3.8103
GIKMOD02	40.1597	61.3876	28.0219	30.552	2.51015	3.9282
GIKMOD03	40.4329	40.171	28.5964	30.6616	2.50215	3.92289
NUVYIN	40.794	50.5795	7.72492	28.947	3.39858	5.06465
WOPDEL	40.9697	32.2796	18.8698	20.0246	4.03658	5.48028
XIMPOA	41.2622	39.1865	38.2585	40.8024	2.99963	3.66828
WOCVUG	41.2885	70.223	22.4526	87.9033	3.56283	4.37067
LIDZUV	41.7664	33.6419	32.6134	41.0547	3.77339	5.12552
GITTOT01	41.8802	39.9296	22.158	28.6244	3.10209	11.4006
PEGCAH	41.9379	43.7923	21.1229	22.594	3.55963	4.41751
UTEXIB	42.0241	16.6481	14.1461	12.644	3.96492	6.29701
NABNUA	42.0864	42.4952	36.5912	29.4462	2.88021	4.40845
NARTIL	42.1203	208.049	23.5626	54.0288	3.84842	4.48691
ZEFVOX	42.2375	41.4927	65.6177	63.7516	2.50004	5.14664
CITXUZ	42.4383	50.6235	17.159	19.4853	2.7632	5.80705
QEZZIF	42.4806	56.7217	14.0716	33.2051	3.32799	4.67652
QATRAG	42.6542	44.9575	27.6023	74.8317	3.21676	4.21344
ILUFIF	42.7688	75.676	58.3208	111.353	3.09218	7.09777
GIKMOD08	43.4437	89.0723	21.2744	47.9838	2.56651	3.94198
ETUWOG	43.4935	45.3165	29.0801	28.942	2.63619	4.3132
ELIJUF	43.5048	219.47	8.14667	121.433	3.63869	4.98722
PIHNUQ	43.5467	80.4901	37.164	79.3136	3.62057	4.36505
NAPFOA01	43.8232	81.0985	26.9366	49.5888	3.98305	5.31373
TETWOG	43.8893	64.4261	43.1224	56.8622	3.07417	3.76455
FIYDOH	43.9634	142.902	77.7801	155.521	3.85906	4.62011
VODPOU	43.9864	61.2914	29.5851	39.0493	2.86572	4.01882
BIVXEK	44.0822	42.6212	34.1163	35.7786	3.13827	4.38344
DUXKEN	44.5855	133.207	53.3125	107.165	2.66706	5.19652
IHIWIF	44.6019	43.486	32.2206	34.2126	2.56403	4.71706
PIGXAF	44.8416	44.8943	22.3442	22.4672	2.94053	4.48463
GIKMOD10	44.8458	66.4905	5.67267	44.7901	2.59885	3.94696
ZNGLUD	44.8516	74.5275	36.2134	57.5861	2.66271	3.19455
GETXAG	45.5407	79.5947	33.9649	41.012	2.61071	3.33124
OJAKUG	45.6165	147.407	205.324	222.112	3.17471	3.99498
HOJLEY	45.7462	36.6795	17.9046	18.0464	2.83052	3.63337
GIKMOD11	45.7575	56.0589	17.3824	45.814	2.61268	3.92028
EHUCOA	45.9265	60.9328	29.6286	52.2628	3.25891	5.17903
XAKRAE	46.7194	48.1758	287.938	455.491	2.61921	3.51244
FECWOB01	47.1315	66.0432	64.2031	56.6882	3.04516	4.17085
CAZFOA	47.303	106.94	30.9913	39.7702	2.95907	3.89004
MODDEP	47.3424	93.1216	48.288	75.971	2.69903	3.3093
EXUMOZ	47.7336	32.5185	40.8421	40.8363	2.99752	3.8372
KIFXOO	48.0373	151.686	14.4771	134.167	3.02702	4.97615
QALNEW	48.3156	44.6609	40.012	44.0086	2.74105	3.78403
TUVDIX	48.4633	69.7347	66.5716	63.7265	3.21232	7.26897
YUJNOH	48.7419	48.9938	41.1174	41.7877	3.46452	5.27714
HELCUY	48.8444	44.3341	35.1619	40.8019	2.60112	3.75849
GIKMOD09	48.852	73.8547	5.81702	50.326	2.58011	3.94339
NIRDOI	48.8741	50.5929	45.1521	42.3387	2.74753	3.72517
ZEJCUO	48.8758	26.5851	31.0741	48.1767	2.60004	3.4618
HEBTAL	49.0725	48.1934	19.7301	87.5448	3.03297	4.70614
YASNAJ	49.116	40.1664	42.9446	55.0322	3.22962	5.78381
WUZRUE	49.1185	133.323	17.9945	28.373	2.62616	4.22154
NIKDIU	49.4791	258.593	24.8973	171.46	2.52089	3.57373
HAZNON	49.6967	64.0939	58.4045	74.6886	2.60838	4.92903
XOVVEK	49.7528	45.8173	42.2869	38.425	3.32854	4.5587
ITIBET	49.8858	57.9902	31.2168	39.6183	2.8532	4.61324
VONBUW	49.9415	191.781	43.4362	141.664	2.90353	4.78685
TEJQAC	49.9988	39.4564	39.9802	34.8515	3.19439	3.76144
LUSZOP01	50.2026	71.9928	5.93877	42.2555	2.56857	3.94583
LUSZUV	50.3666	77.7136	5.01871	42.4371	2.56912	3.94192
WIDZOA	51.0163	46.4031	39.6053	37.7137	3.17117	4.22629
BIBBUL	51.1452	92.2576	7.99813	38.7271	3.31702	3.85878
ZEGSUB	51.1603	49.649	28.4215	30.0984	3.30813	7.31541
PUQHIT	51.5645	63.4826	24.7011	31.2938	2.80454	4.11931
EBEMII	52.0356	6.67013	11.8508	56.0267	3.57779	4.74887
KAVTUY	52.1573	52.7322	33.4276	31.8038	4.08985	5.22962
IQIPAZ	52.3435	78.9617	23.5476	22.1417	3.36787	5.68593
MEHPAQ	52.6569	69.9042	38.9154	34.4858	2.64049	3.09554
OFERUN02	52.8075	57.1488	36.9192	40.6333	3.12691	11.4294
JASNEX	53.9757	73.5982	32.4139	92.5928	2.72372	3.25557
BEPVAV	54.0493	51.8582	48.3687	47.4813	3.25406	4.46396
KIBDEF	54.2928	165.828	40.3559	131.578	3.92279	4.31905
QOXNIB	55.2121	34.2586	21.4221	40.0953	3.61253	4.25979
LIRTEM	55.2175	58.3245	27.1044	57.594	3.08988	4.39679
FIGQUJ	55.3112	52.0946	37.9112	42.5856	2.87726	4.99341
LUSZIJ01	55.4815	82.4164	20.3945	37.7522	2.57303	3.93885
PEFSEA	56.6551	48.1269	44.5157	38.8313	2.87938	4.38811
YUJNIB	56.9267	58.6664	40.8509	39.0635	2.59839	3.94507
RAXDAX	56.9769	56.7773	10.6412	34.008	2.80345	3.78
LUTCIN	57.0388	82.7089	15.8565	34.264	2.5461	3.89894
FEVDIV	57.5856	47.2851	54.0037	61.3086	2.53303	4.11804
LERNEC01	58.1589	72.4334	45.47	44.3676	2.64138	4.91469
GUPJEG	58.4216	49.3143	41.4463	33.4	3.38841	3.71266
FEJKEM	58.5329	37.2912	8.02868	23.9065	3.08881	3.45598
CUGLTM	58.6212	55.3619	54.0744	66.795	2.69075	3.17988
KAXQOR01	58.9199	45.4039	16.1963	62.8236	3.66075	4.99192
KAXZUG	58.9212	64.3169	66.2515	52.8648	2.59156	4.51369
HUTTIA	58.9764	64.7838	37.4698	41.2061	2.94896	4.93965
TAFBIN	59.4563	53.2853	26.2952	36.6372	3.22691	4.89948
LUTCAF	59.4647	70.838	15.8816	45.2332	2.5592	3.90986
XEHSUZ	59.7253	58.648	40.4358	37.5891	3.78928	4.73753
DOHYIJ	59.968	89.692	22.8442	80.4654	3.118	3.65608
XEHSIN	59.9697	59.5584	41.0262	40.9195	3.64676	4.81303
VAGKOF	60.1952	62.6964	46.175	40.7413	2.62002	5.16963
XEHSEJ	60.7333	59.7973	43.8843	37.6221	3.85188	5.24127
WAHREE	60.9789	61.0525	35.4523	64.3583	2.85009	4.96921
MUFJAZ01	61.3939	58.6885	34.5444	73.7497	2.67319	3.39058
FOHSAW01	61.4194	75.2647	35.8924	79.7596	3.30187	4.19352
HAJLIO	61.6667	60.8902	52.3753	41.3003	3.51824	5.88281
ZNGLUD01	62.2588	56.2832	28.437	25.6638	2.59565	3.16473
REJVOS	62.4412	62.1353	40.5103	37.5853	3.67275	4.89378
HIDMEO	62.5257	95.0684	85.7469	84.1888	2.55733	3.70259
JEJKEP	62.6709	61.232	39.1555	38.3238	2.80032	5.0932
VAQLAC	62.9407	38.5719	33.9222	28.0064	2.78544	3.80978
ILUHIH	63.4043	168.159	61.4881	78.6508	3.05989	7.14256
BARZAW	63.7822	68.9205	55.9715	56.2062	2.55685	7.73837
XEHSOT	64.398	62.1705	56.8405	41.8254	3.63666	4.76348
KIFKAM	64.7989	69.9992	50.2277	48.5147	3.04859	4.32056
MIHHUG	64.8524	38.4572	49.4461	44.0508	3.29973	5.15935
LIHSIF	64.9106	59.7182	51.2414	54.8732	2.5942	4.51896
CEFLEF	65.1449	71.3288	72.7263	69.0486	3.11475	7.24143
EVUNIT	65.2938	89.038	23.9258	73.1162	2.62968	4.36696
ECUCIP	65.9896	93.2312	3.40452	56.3083	2.64336	3.79378
NERVOV	66.4164	81.2704	46.4453	45.0077	2.77559	5.20555
TOHPUC	66.7737	189.755	47.657	207.62	2.51178	4.09389
ESIPUR02	66.913	80.501	56.161	55.8903	2.81655	4.9703
BARZOK	67.2842	67.1582	43.4358	44.5069	2.7399	7.65896
ILUJIJ	67.3498	97.1734	54.2414	68.4795	3.15378	7.16071
AMIKOX	67.5369	153.612	29.0077	146.309	2.69518	3.46941
XUYDIF	67.5766	174.555	36.1853	104.252	2.90765	3.88622
FIRVEH	67.9858	368.376	36.1703	209.975	3.26577	4.11749
YEYYAC	67.9984	102.089	32.5072	31.9361	3.00875	6.35432
UTEXAT	68.3456	12.7821	13.5352	9.7027	4.0077	6.27145
IVARUT	68.3933	95.0927	43.3308	113.622	2.98662	3.98401
FIHLOZ	68.6825	101.326	40.0631	124.186	2.95224	5.07016
TAFCIO	68.8599	60.4555	40.9003	45.4696	2.87014	5.00686
VARREL	69.1569	82.3064	68.6297	69.9728	3.2556	6.17066
OCIVIH	69.2452	59.0153	49.4381	45.7604	3.22991	7.04533
VEJYUF01	69.4377	91.253	45.3713	55.2748	2.60028	5.23877
WOHZAU	70.2376	64.3754	38.2024	41.5651	3.1609	5.02471
BONNIC	70.333	71.0062	69.8121	119.912	3.03382	4.09843
HEDTER	70.7175	66.3503	45.2307	51.1833	2.7809	4.77494
DOTWAL	70.7937	156.146	41.7111	42.9806	3.24941	6.26428
CERMIV	70.7966	90.3351	104.204	96.8366	3.15163	6.14808
CILDAD	70.9506	66.6114	40.3451	61.8688	2.50478	3.07453
FAFJIH	71.6129	40.8149	30.8311	26.9153	2.55624	3.61922
TUVDOD	71.6259	97.3157	57.7894	120.098	3.14901	7.2437
FAHTUE	72.6342	86.2824	48.2541	88.4205	3.1424	7.2202
MIHHOA	72.8685	65.9704	97.4441	103.106	3.21821	4.98547
HAJLOU	73.5957	32.4009	50.2164	40.8442	3.5289	5.886
CAHSOU	73.6217	75.7308	75.3651	54.5125	2.77879	4.04164
EZUCOS	73.9346	130.983	39.3133	40.4936	3.17302	6.21547
ZEFVIR	73.994	73.0443	69.3289	68.9649	2.5027	5.15122
IPOWOA	74.1576	110.215	73.5698	115.1	2.83702	4.16556
IJENER	74.4953	70.0029	56.6639	73.2685	2.57734	6.00155
IBOTAU	75.1179	74.3275	46.3186	46.3437	2.91754	6.68004
NERVEL	75.6392	82.1813	50.7373	53.3753	2.50642	4.91794
MECLEL	75.7367	122.958	75.6496	76.5927	2.85573	6.56223
LEVYOC	75.858	104.019	20.8928	19.0234	3.53475	4.43687
XALTOV	75.8852	71.3246	48.4382	132.244	3.00948	12.1705
XEHFUL	75.9019	73.2116	52.618	34.6979	2.60046	4.30377
PEFTAX	77.0521	108.52	28.3207	48.7633	2.87105	4.53798
GINDEO	77.7387	99.7633	24.2086	64.4336	2.70694	4.38238
KAVRIK	78.2358	78.1768	40.8371	40.0505	2.9714	5.59809
EKARUE	78.9596	49.0674	55.8267	56.3405	3.20781	4.2283
CUGLTM01	79.9085	72.2238	61.6504	77.1852	2.6439	3.16369
NABCIE	81.6332	83.6729	68.9301	65.3624	2.59798	3.55623
HEDCEA	81.6847	65.1474	93.7626	55.5526	2.92557	4.7556
MAZJEC	82.0901	80.0822	62.7977	82.7624	2.93292	5.75047
KAVREG	82.7825	97.7583	44.6805	43.0785	2.83796	5.54039
TAKYOV	82.8809	152.001	90.6966	80.5043	3.04881	7.07022
ILUFOL	83.0524	83.4582	78.3872	116.445	3.06586	7.10596
QOPHEI	83.6988	97.9612	138.611	96.0479	2.56912	3.51928
KOMHAW	84.2059	84.3411	52.2297	52.1883	2.83423	4.30719
NOFQII	84.6348	250.004	92.076	237.492	3.25534	6.19412
GEVKID	84.9515	129.201	47.0432	74.3949	3.02065	4.59038
ELIKEQ	85.3201	111.965	15.5289	46.7294	3.80728	4.99766
GUPJEG01	85.7197	87.2669	41.5467	34.623	3.35645	3.68475
SAKDEP	85.8243	84.5214	58.527	55.6326	3.20042	5.60133
OPENIH	86.1611	78.117	47.8269	53.4	3.18264	3.75861
TUVDUJ	86.6757	103.157	59.8814	150.833	3.15351	7.30526
PAZXUJ	86.8067	67.5712	63.6658	22.0053	3.12538	3.82629
KAVROQ	86.9213	89.2138	48.1265	48.0344	2.87136	5.56636
ZETQEW	87.7305	83.7252	73.0263	64.4918	2.73604	4.43317
KOLWEO	88.5067	115.131	51.1787	98.7955	2.59235	4.80101
DAGDIZ	91.3635	94.394	53.2485	58.0492	3.58733	6.53637
EJEFOP	91.4677	112.704	54.8397	60.5885	2.84987	4.0642
IFEPIT	92.0936	88.3736	14.1637	15.2954	2.50502	3.789
XIPBOO	92.617	83.7762	49.1704	114.524	3.03689	7.07279
BERFIP	92.8756	167.32	107.977	167.994	2.71437	4.07847
FAHVAM	94.0019	96.278	87.6004	78.0149	3.20421	7.31279
EVEGER	95.3107	125.39	44.1563	47.1562	3.24345	7.46813
QIFLIC	100.424	98.7633	81.4123	88.3368	2.79398	5.58826
OGIYAF	100.765	111.311	81.165	101.105	2.65637	4.13022
DEYXIQ	100.849	186.58	66.5612	150.908	3.32439	4.50777
TAKYEL	100.906	132.398	63.7767	125.825	3.12698	7.08036
UNEBIZ	101.61	127.889	21.9564	101.524	2.99503	5.60217
GAWBEM	101.726	134.54	72.1803	90.9581	2.72795	3.68052
PASNEE	102.25	111.128	1.18826	90.7355	2.83674	4.1572
FELVOJ	102.28	103.859	63.0412	65.8545	2.59168	5.97797
XUNJOG	102.939	130.219	72.9313	98.8721	2.67373	3.24837
XEXNEV	103.064	108.7	57.4103	84.331	2.62071	4.91208
BARZIE	103.822	57.6555	46.742	45.2157	2.59337	7.74818
MAYPIM	105.849	125.622	68.8168	106.854	2.65055	4.30951
ILUHUT	106.893	114.801	40.9404	71.0443	3.21073	7.11344
REYBAA	107.022	27.8834	60.2546	24.9672	3.50951	4.19945
IWEPUW	107.265	111.721	54.9443	99.6169	2.51109	3.20048
DUGBAJ	108.165	149.992	64.5466	144.963	3.05086	7.13438
ZETQIA	108.623	108.143	70.5535	66.6034	2.70419	4.38937
ILUGOM	108.809	135.516	65.9147	97.1023	3.07068	7.1541
ZETPUL	108.999	86.249	72.0071	63.1173	2.77473	4.3933
COYTUG01	109.782	42.4366	11.2022	52.8866	2.85255	4.85681
ILUJEF	109.838	116.75	39.0618	72.2117	3.13122	7.09377
WEWGAH	110.591	133.804	60.4253	60.8144	2.55363	3.68933
HEFDIH	110.982	87.9079	57.6743	59.5668	2.61069	4.92199
LUTBUY	113.879	144.086	116.227	134.818	2.5829	3.93905
CELZIE	114.203	122.556	97.7834	93.1007	2.63187	5.88328
QUKYOL	114.632	149.174	101.005	143.894	2.89067	4.31995
DUFZUA	115.374	187.757	88.8054	114.955	3.11961	7.17076
BAKLIK	116.904	309.693	161.023	146.276	2.89089	6.44441
XUNJIA	118.7	91.5794	109.742	161.657	2.86382	3.16551
GAXGIX	119.305	206.428	68.7917	47.4541	3.1306	4.87192
ROJNEJ	120.243	324.883	60.6262	200.542	2.77756	4.01951
FELVEZ	120.473	123.466	74.5739	75.8187	2.53239	5.91981
ECORIX	120.976	144.163	69.3971	151.105	3.03659	3.90772
XOJCUV	122.008	138.419	85.0595	203.072	2.50912	4.0943
CUYVOI	122.256	114.954	67.357	91.3576	2.63151	4.52428
MAKSUO	123.994	64.9704	20.7108	46.9742	2.87742	3.81372
FELWIE	124.189	129.45	77.6914	79.2044	2.50992	5.9068
EVUNEP	124.487	103.945	35.8485	55.9945	2.63132	4.38284
HAOAER	126.031	128.514	150.645	106.67	2.51122	3.28684
WOWHAR	126.894	126.921	99.6386	95.6571	2.65556	4.10947
XUWVEQ	128.523	121.72	160.694	257.359	2.7861	3.87598
HURQUG	129.137	217.172	48.9963	72.7782	3.21738	6.31221
UBOGAV	131.671	136.624	103.703	103.898	3.09037	5.07523
ILUGAY	132.286	144.653	61.4337	107.939	2.93792	7.03145
ECUCUB	138.509	156.705	108.216	218.996	2.8656	3.57107
LUPHIN	139.867	139.078	74.9999	74.3321	2.56897	5.12922
WALBOC	140.914	173.186	132.578	111.224	2.9644	4.17363
LUTBEI	143.591	155.206	94.4337	107.203	2.55814	3.92652
KEQZAJ	145.606	147.05	138.269	59.2856	3.11001	4.82685
MAQZOV	148.501	133.366	89.815	90.3175	2.59641	3.79529
UBACUX	148.576	130.307	70.5887	129.66	3.40268	7.27569
YAPYUK	149.007	147.025	97.5307	94.3145	2.51848	3.81265
WOWHEV	153.575	154.019	112.709	117.68	2.59845	4.07173
FUFREE	157.339	115.081	48.321	156.595	3.09275	3.74304
EYULOA	158.689	465.466	191.881	337.466	3.99192	4.93073
XAPYAO	158.968	215.575	40.9848	174.544	3.04724	4.15939
EXIDEV	159.867	153.741	65.7357	137.728	2.86096	4.20107
SESDEA	160.817	103.766	99.1558	99.1725	2.67675	3.28889
QUKYUR	160.856	165.133	112.238	144.017	2.88893	4.2216
GEPDIQ	161.08	237.614	10.1127	51.6096	3.20855	4.79078
LUTCEJ	161.973	165.959	102.931	110.179	2.58728	3.9269
GEHSAN	163.312	181.321	130.304	171.843	2.65292	4.21897
DODHUA	164.932	165.562	139.541	110.208	2.64299	3.82979
CEGWER	191.289	227.546	122.895	199.137	3.87534	4.43901
TESHAB	215.528	203.092	164.463	147.93	3.84947	5.24315
RATDAS02	215.528	226.992	186.348	187.559	3.63147	4.66068
ICANEH	222.655	306.465	80.3533	348.111	2.8069	7.44304
KEXPOU	231.56	284.463	175.113	254.591	2.7409	4.06064
YICGOI	249.71	146.628	246.432	132.145	2.62761	5.21305
IXURAV	291.877	152.743	33.1611	99.6675	3.9269	4.70928
WEBREC	24.2082	505.632	8.73787	133.839	3.78553	5.39661
POXHOA	33.9151	370.805	21.0539	1159.54	3.29845	3.6953
OJAKOA	40.0384	751.965	15.862	82.2156	3.37132	4.13561
PEGBUA	45.3529	507.251	457.127	426.417	3.44241	4.24178
BONWAD	106.706	509.502	130.633	379.09	2.72512	3.83514
LACGED	166.31	996.453	239.189	441.102	3.44165	5.2733
TIQGEG	168.56	582.614	159.926	481.378	3.05406	3.99152
EBANAY	207.174	7462.67	73.4409	75.4764	3.18083	3.59235
NAXVOY01	306.717	273.671	1184.21	198.642	3.67769	4.75058
XEJTIR	349.1	749.597	320.57	375.048	2.90436	4.61538
LEMNOH	379.037	560.451	201.111	341.686	3.09524	4.05561
MIJYEK	403.943	704.519	26.8203	578.819	3.22254	5.3671
GAGXAP	513.088	349.698	4687.88	265.475	2.84597	5.16363
ESIPUR	626.696	332.487	360.922	310.956	2.80803	4.97103
BEKSAM	823.671	123.023	40707.9	924.978	3.3801	4.03684
RAVVOA02	7252.09	279.454	289.389	218.741	3.65202	4.70077
HAJLEK	233846	31.1361	116.805	39.5095	3.45438	5.87742

## Sheet: 116 UFF-FM NEB barriers
CSD refcode	1st NEB setup		2nd NEB setup		porosity descriptors
	propane	propene	propane	propene	Df (Å)	Di (Å)
	(kJ/mol)	(kJ/mol)	(kJ/mol)	(kJ/mol)
CITXUZ	42.4383	17.159	50.6235	19.4853	2.7632	5.80705
DEGJIK	35.9623	25.9228	43.6161	29.4855	3.8442	4.49857
EXOZEX	23.6927	9.73659	26.8625	8.28014	3.02039	5.85437
FASQUN	36.8364	20.8811	33.2553	21.6237	3.03904	5.13227
FIGQUJ	55.3112	37.9112	52.0946	42.5856	2.87726	4.99341
GIKMOD05	39.2911	27.3169	45.5064	29.2976	2.53368	3.93179
GITTOT01	41.8802	22.158	39.9296	28.6244	3.10209	11.4006
GUPJEG	58.4216	41.4463	49.3143	33.4	3.38841	3.71266
IFEPIT	92.0936	14.1637	88.3736	15.2954	2.50502	3.789
IJENER	74.4953	56.6639	70.0029	73.2685	2.57734	6.00155
JEJKEP	62.6709	39.1555	61.232	38.3238	2.80032	5.0932
LEVYOC	75.858	20.8928	104.019	19.0234	3.53475	4.43687
LIFWEE	27.9717	14.3628	28.1575	16.4055	3.86694	4.94583
NIHBEM01	23.3961	11.2558	23.2208	12.2256	3.68372	4.87963
OFERUN03	37.2903	21.5258	44.0169	27.1224	3.40962	11.4629
OPENIH	86.1611	47.8269	78.117	53.4	3.18264	3.75861
PEGBEK01	39.7028	25.2007	48.6775	22.6141	3.43767	4.25489
RAVVOA01	32.0938	13.0156	27.8935	13.5147	3.65894	4.63178
TAFCIO	68.8599	40.9003	60.4555	45.4696	2.87014	5.00686
TEVZEA	30.0851	15.4586	28.2466	16.7946	3.52297	4.59329
VOTMAS	39.9689	22.2505	38.9233	22.1693	2.95777	4.44531
WOPDEL	40.9697	18.8698	32.2796	20.0246	4.03658	5.48028
XEHSEJ	60.7333	43.8843	59.7973	37.6221	3.85188	5.24127
CAKXIX	34.3402	19.7071	33.7398	20.7045	2.81759	4.13408
EDAGAT	28.6642	13.2486	25.7065	11.9139	3.62215	4.66461
KAVREG	82.7825	44.6805	97.7583	43.0785	2.83796	5.54039
NIHBEM	27.6638	11.6696	25.5245	12.2687	3.66332	4.82471
NIHBEM02	29.7194	10.6633	23.1103	9.63701	3.78432	5.01891
NIHBIQ02	23.9597	9.51944	21.8321	10.0726	3.95166	5.38184
NIKYOW02	27.4567	10.9144	26.5692	11.9462	3.68194	4.72463
NIKYUC01	28.1324	11.4006	24.9772	11.3374	3.68791	4.94759
NIKYUC02	23.8605	9.24371	22.8057	9.94537	3.78234	5.06856
NIKZAJ02	30.0587	11.6064	26.2295	12.552	3.68938	4.67382
NIKZEN	26.4768	10.2947	24.6986	10.5048	3.70751	4.82301
NIKZEN01	26.2638	10.7926	26.9303	11.132	3.71164	4.86464
NIKZEN02	24.5722	10.4466	24.1233	10.4855	3.78699	4.94738
OCIVIH	69.2452	49.4381	59.0153	45.7604	3.22991	7.04533
OGUPIQ	27.5939	5.00908	26.1328	5.92622	3.53796	5.83456
RATCUL01	24.2718	9.67759	23.0179	9.63492	3.6752	4.69215
RATCUL02	26.3195	9.9801	22.6133	10.3759	3.72749	4.70959
RATCUL03	25.1216	9.49308	22.5271	9.34998	3.7831	4.74713
RAVVIU01	28.5583	14.495	28.6077	13.5231	3.5679	4.59869
TEVZIE	31.6812	14.6072	29.7625	14.6139	3.64059	4.89772
XEHSIN	59.9697	41.0262	59.5584	40.9195	3.64676	4.81303
XEHSUZ	59.7253	40.4358	58.648	37.5891	3.78928	4.73753
YANBAR02	27.7198	12.0591	25.0638	10.9307	3.83765	4.9953
YUJNIB	56.9267	40.8509	58.6664	39.0635	2.59839	3.94507
ZEGSUB	51.1603	28.4215	49.649	30.0984	3.30813	7.31541
GITTOT	37.7773	22.5706	33.9783	32.1197	3.07343	11.4137
GUPBOJ01	27.5713	15.3829	27.4433	15.0737	3.8895	5.5554
TESGUU	33.1394	16.2933	29.7805	15.2758	3.58268	4.82436
OFERUN02	52.8075	36.9192	57.1488	40.6333	3.12691	11.4294
WOCVUG01	40.04	25.9672	44.6977	24.2701	3.41671	4.33403
ESIPUR02	66.913	56.161	80.501	55.8903	2.81655	4.9703
GUPJEG01	85.7197	41.5467	87.2669	34.623	3.35645	3.68475
DAGDIZ	91.3635	53.2485	94.394	58.0492	3.58733	6.53637
DAPXEZ	34.3699	16.4737	33.0051	16.3904	3.282	4.82667
EMICUZ	29.0252	12.1922	36.9071	11.8349	2.53854	4.0744
GAWJEV	28.3884	12.8353	29.3662	13.003	3.38284	4.86365
HELCUY	48.8444	35.1619	44.3341	40.8019	2.60112	3.75849
IHIWIF	44.6019	32.2206	43.486	34.2126	2.56403	4.71706
ITIBET	49.8858	31.2168	57.9902	39.6183	2.8532	4.61324
IZEHAX	36.9958	26.9429	33.8728	28.3512	3.14826	4.457
KAVTUY	52.1573	33.4276	52.7322	31.8038	4.08985	5.22962
KOMHAW	84.2059	52.2297	84.3411	52.1883	2.83423	4.30719
LIHSIF	64.9106	51.2414	59.7182	54.8732	2.5942	4.51896
MAJHOW	30.8085	20.7539	39.7861	20.4158	3.2085	5.19955
MEHPAQ	52.6569	38.9154	69.9042	34.4858	2.64049	3.09554
NERVOV	66.4164	46.4453	81.2704	45.0077	2.77559	5.20555
ODAJAG	33.6331	20.2895	31.1072	24.358	3.25151	4.17677
PEGQAV	35.359	22.0129	41.5279	22.2702	3.15291	5.14547
PEGQUP	34.8862	20.8447	31.4469	22.3342	3.49069	4.99244
PELXIP	26.6157	12.7386	25.5705	11.5901	3.66818	5.04305
TISKOW	27.4801	17.4368	25.6437	18.1916	2.95571	6.20375
VODPOU	43.9864	29.5851	61.2914	39.0493	2.86572	4.01882
ZAVMIU	32.6327	17.6297	28.2144	16.6448	2.90422	5.45393
ZNGLUD01	62.2588	28.437	56.2832	25.6638	2.59565	3.16473
HEDTER	70.7175	45.2307	66.3503	51.1833	2.7809	4.77494
YEZFIU	23.8739	10.8198	23.4722	12.075	3.87237	7.76134
ZIGWUJ	31.2867	19.3284	30.68	20.7326	3.34297	5.41641
TEJQAC	49.9988	39.9802	39.4564	34.8515	3.19439	3.76144
GIKMOD03	40.4329	28.5964	40.171	30.6616	2.50215	3.92289
HOJLEY	45.7462	17.9046	36.6795	18.0464	2.83052	3.63337
PUQHIT	51.5645	24.7011	63.4826	31.2938	2.80454	4.11931
REJVOS	62.4412	40.5103	62.1353	37.5853	3.67275	4.89378
BARZOK	67.2842	43.4358	67.1582	44.5069	2.7399	7.65896
EJEFOP	91.4677	54.8397	112.704	60.5885	2.84987	4.0642
ETUWOG	43.4935	29.0801	45.3165	28.942	2.63619	4.3132
VEJYUF01	69.4377	45.3713	91.253	55.2748	2.60028	5.23877
SAKDEP	85.8243	58.527	84.5214	55.6326	3.20042	5.60133
FUZKAN	29.5809	11.7068	32.8026	14.8365	3.23595	5.06549
KAVROQ	86.9213	48.1265	89.2138	48.0344	2.87136	5.56636
PIGXAF	44.8416	22.3442	44.8943	22.4672	2.94053	4.48463
LERNEC01	58.1589	45.47	72.4334	44.3676	2.64138	4.91469
PEFSEA	56.6551	44.5157	48.1269	38.8313	2.87938	4.38811
VAGKOF	60.1952	46.175	62.6964	40.7413	2.62002	5.16963
WIDZOA	51.0163	39.6053	46.4031	37.7137	3.17117	4.22629
IBOTAU	75.1179	46.3186	74.3275	46.3437	2.91754	6.68004
WEWGAH	110.591	60.4253	133.804	60.8144	2.55363	3.68933
EVEGER	95.3107	44.1563	125.39	47.1562	3.24345	7.46813
NIKYUC	28.9663	11.242	25.4437	11.4989	3.64376	4.9018
PEGPUO	39.6643	28.4847	35.564	25.1751	3.11785	5.11559
QALNEW	66.913	56.161	80.501	55.8903	2.81655	4.9703
WOHZAU	70.2376	38.2024	64.3754	41.5651	3.1609	5.02471
XEHSAF	30.5846	14.5725	27.5642	14.2499	3.65952	4.88747
XOBXIW	36.3753	14.3344	32.754	17.1226	3.51548	4.67713
HEFDIH	110.982	57.6743	87.9079	59.5668	2.61069	4.92199
HUTTIA	58.9764	37.4698	64.7838	41.2061	2.94896	4.93965
HAKCIG	35.9657	16.121	41.3547	19.5979	2.97433	5.39588
PEGCAH	41.9379	21.1229	43.7923	22.594	3.55963	4.41751
NERVEL	75.6392	50.7373	82.1813	53.3753	2.50642	4.91794
TAFBIN	59.4563	26.2952	53.2853	36.6372	3.22691	4.89948
XAXQEU	36.8559	23.9587	37.9216	23.6206	3.21043	4.2322
KAVRIK	78.2358	40.8371	78.1768	40.0505	2.9714	5.59809
KIFKAM	64.7989	50.2277	69.9992	48.5147	3.04859	4.32056
HAJLIO	61.6667	52.3753	60.8902	41.3003	3.51824	5.88281

## Sheet: 23 DFT NEB barriers
CSD refcode	DFT		UFF-FM		Energy difference		Metals	Df (Å)
	Propene	Propane	Propene	Propane	DFT	UFF-FM
CITXUZ	87.5402	106.995	17.159	42.4383	19.4544	25.2793	Cu	2.7632
DEGJIK	35.3462	29.4896	25.9228	35.9623	-5.85661	10.0395	Cu	3.8442
EXOZEX	34.502	32.9626	9.73659	23.6927	-1.53948	13.9561	Cu	3.02039
FASQUN	42.2768	47.9835	20.8811	36.8364	5.70665	15.9553	Zn	3.03904
ZIF-67	23.55	40.67	22.158	41.8802	17.12	19.7222	Co	3.07343
GUPJEG01	48.0554	53	41.5467	85.7197	4.94458	44.173	Mn	3.35645
HAJLIO	59.0968	74.4184	52.3753	61.6667	15.3215	9.2914	Fe	3.51824
IFEPIT	56.1879	62.271	14.1637	92.0936	6.08304	77.9299	Te,Ga	2.50502
IJENER	36.5	57.6	56.6639	74.4953	21.1	17.8314	Ag	2.57734
JEJKEP	39.534	46.235	39.1555	62.6709	6.70108	23.5154	Co	2.80032
LEVYOC	116.303	122.222	20.8928	75.858	5.9193	54.9652	Co	3.53475
NIHBEM02	14.2889	25.4035	10.6633	29.7194	11.1146	19.0561	Fe	3.78432
OPENIH	28.7	40.6	47.8269	86.1611	11.9	38.3342	Cu	3.18264
PEGBEK01	28.5015	27.8876	25.2007	39.7028	-0.613913	14.5021	Zn	3.43767
RAVVOA01	22.258	23.8296	13.0156	32.0938	1.57156	19.0782	Co	3.65872
TAFCIO	49.6855	71.3279	40.9003	68.8599	21.6424	27.9596	Co	2.87014
TEVZEA	20.8786	19.0753	15.4586	30.0851	-1.80331	14.6265	Zn	3.52297
VOTMAS	41.2489	57.614	22.2505	39.9689	16.3652	17.7184	Sr,Ca	2.95777
WOPDEL	21.0699	35.2114	18.8698	40.9697	14.1416	22.0999	Mn	3.85188
XEHSEJ	20.5	27.1	43.8843	60.7333	6.6	16.849	Mg	4.03658
ZIF-8	20.8	42.6	21.5258	37.2903	21.8	15.7645	Zn	3.40962
LIFWEE	77.4	81.3	14.3628	27.9717	3.9	13.6089	Cu	3.86694
FIGQUJ	70.7	77.6	37.9112	55.3112	6.9	17.4	Cu	2.87726

## Sheet: Summary
CSD refcode	The reason for discarding the MOF structure		Number of MOFs	Outcome
ADASAB	Marked as charged in CoRE MOF		501	Marked as charged in CoRE MOF
ADOBAX	Marked as charged in CoRE MOF		1	Voronoi decomposition fails in Zeo++
ADOBEB	Marked as charged in CoRE MOF		144	Pore window diameter is smaller than 2.5 A
ADOBOL	Marked as charged in CoRE MOF		1880	Pore window diameter is larger than 4.3 A
ADOBUR	Marked as charged in CoRE MOF		798	5ns MD simulation failed
ADOCAY	Marked as charged in CoRE MOF		770	Propane diffused to the next unit cell in a 5ns MD run
ADOCIG	Marked as charged in CoRE MOF		165	Energy barriers in UFF-FM NEB are larger than 1000 kJ/mol
ADODAA	Marked as charged in CoRE MOF		339	The difference in energy barriers between NEB1 and NEB 2 is greater than 30%
AGUVOO	Marked as charged in CoRE MOF		50	NEB1 and NEB2 agree but propane and propene energy barriers are within 10 kJ/mol
ALOLET	Marked as charged in CoRE MOF		93	Not shortlisted for DFT studies (repetitions, missing coordinated solvents, the cell is too large for DFT, etc...)
ALOLIX	Marked as charged in CoRE MOF		23	Shortlisted for DFT studies
AMEJIM	Marked as charged in CoRE MOF
AMEJOS	Marked as charged in CoRE MOF
AMUWIP	Marked as charged in CoRE MOF
AVOSIO	Marked as charged in CoRE MOF
AWEBIO	Marked as charged in CoRE MOF
AWEDOW	Marked as charged in CoRE MOF
AWEDUC	Marked as charged in CoRE MOF
BARZOL	Marked as charged in CoRE MOF
BAZDAJ	Marked as charged in CoRE MOF
BELVAR	Marked as charged in CoRE MOF
BELVEV	Marked as charged in CoRE MOF
BIMDOR	Marked as charged in CoRE MOF
BOMCUB	Marked as charged in CoRE MOF
BOXFAW	Marked as charged in CoRE MOF
BUCROH	Marked as charged in CoRE MOF
BUCSIC	Marked as charged in CoRE MOF
BUFNEW	Marked as charged in CoRE MOF
BUFNOG	Marked as charged in CoRE MOF
BUFPAU	Marked as charged in CoRE MOF
BUFPAU01	Marked as charged in CoRE MOF
BUYNAL	Marked as charged in CoRE MOF
CAJVUG	Marked as charged in CoRE MOF
CAJWAN	Marked as charged in CoRE MOF
CAJWER	Marked as charged in CoRE MOF
CAWDOU	Marked as charged in CoRE MOF
CAWDOU01	Marked as charged in CoRE MOF
CAXXAC	Marked as charged in CoRE MOF
CAYCEL	Marked as charged in CoRE MOF
CAZNIC	Marked as charged in CoRE MOF
CAZNOI	Marked as charged in CoRE MOF
CAZNUO	Marked as charged in CoRE MOF
CEQBUV	Marked as charged in CoRE MOF
CEXSEE	Marked as charged in CoRE MOF
CIPREZ	Marked as charged in CoRE MOF
CIPRID	Marked as charged in CoRE MOF
CUCKIV	Marked as charged in CoRE MOF
CUSDIE	Marked as charged in CoRE MOF
CUTFON	Marked as charged in CoRE MOF
CUTFUT	Marked as charged in CoRE MOF
DANZAV	Marked as charged in CoRE MOF
DANZEZ	Marked as charged in CoRE MOF
DANZID	Marked as charged in CoRE MOF
DARNOB	Marked as charged in CoRE MOF
DASTEY01	Marked as charged in CoRE MOF
DAXKOE	Marked as charged in CoRE MOF
DEGPEL	Marked as charged in CoRE MOF
DIHPIU	Marked as charged in CoRE MOF
DOQKAW	Marked as charged in CoRE MOF
DOTTUC	Marked as charged in CoRE MOF
DUVNIS	Marked as charged in CoRE MOF
DUVNIS01	Marked as charged in CoRE MOF
EBEVAK	Marked as charged in CoRE MOF
EBIDIE	Marked as charged in CoRE MOF
EBIMIN	Marked as charged in CoRE MOF
EBIMOT	Marked as charged in CoRE MOF
EBUQOH	Marked as charged in CoRE MOF
ECUDIR	Marked as charged in CoRE MOF
ECUFAL	Marked as charged in CoRE MOF
ECUFEP	Marked as charged in CoRE MOF
EDORIY	Marked as charged in CoRE MOF
EDOVEA	Marked as charged in CoRE MOF
EDOVIE	Marked as charged in CoRE MOF
EGEHOO	Marked as charged in CoRE MOF
ELOFIU	Marked as charged in CoRE MOF
EMAFII	Marked as charged in CoRE MOF
EMIFOW	Marked as charged in CoRE MOF
EMIGAJ	Marked as charged in CoRE MOF
EMIGEN	Marked as charged in CoRE MOF
EMIGIR	Marked as charged in CoRE MOF
EMIGOX	Marked as charged in CoRE MOF
EMIGUD	Marked as charged in CoRE MOF
EMIHEO	Marked as charged in CoRE MOF
EPUTUF	Marked as charged in CoRE MOF
EPUVAN	Marked as charged in CoRE MOF
EVAKOB	Marked as charged in CoRE MOF
EWEWUZ	Marked as charged in CoRE MOF
EWIMIH	Marked as charged in CoRE MOF
EWIMON	Marked as charged in CoRE MOF
FACMIH	Marked as charged in CoRE MOF
FACMIH01	Marked as charged in CoRE MOF
FASYUU	Marked as charged in CoRE MOF
FAZRAA	Marked as charged in CoRE MOF
FEDJUU	Marked as charged in CoRE MOF
FENVOL	Marked as charged in CoRE MOF
FERGUG	Marked as charged in CoRE MOF
FEVNEA	Marked as charged in CoRE MOF
FEVNIE	Marked as charged in CoRE MOF
FEVTEF	Marked as charged in CoRE MOF
FEVVIM	Marked as charged in CoRE MOF
FEZCOD	Marked as charged in CoRE MOF
FEZCUJ	Marked as charged in CoRE MOF
FITHAS	Marked as charged in CoRE MOF
FOQSUA	Marked as charged in CoRE MOF
FORWAL	Marked as charged in CoRE MOF
FOXQIT	Marked as charged in CoRE MOF
GAJVEU	Marked as charged in CoRE MOF
GAJVIY	Marked as charged in CoRE MOF
GATBUZ	Marked as charged in CoRE MOF
GATJIV	Marked as charged in CoRE MOF
GAZZIS	Marked as charged in CoRE MOF
GAZZIS01	Marked as charged in CoRE MOF
GAZZIS02	Marked as charged in CoRE MOF
GAZZIS03	Marked as charged in CoRE MOF
GAZZIS04	Marked as charged in CoRE MOF
GAZZIS05	Marked as charged in CoRE MOF
GECRAI	Marked as charged in CoRE MOF
GEDQUD	Marked as charged in CoRE MOF
GERWIL	Marked as charged in CoRE MOF
GERWOR	Marked as charged in CoRE MOF
GESBOW	Marked as charged in CoRE MOF
GESBUC	Marked as charged in CoRE MOF
GEZFIC	Marked as charged in CoRE MOF
GEZFOI	Marked as charged in CoRE MOF
GIWBEU	Marked as charged in CoRE MOF
GIWBIY	Marked as charged in CoRE MOF
GIWBOE	Marked as charged in CoRE MOF
GOJFAN	Marked as charged in CoRE MOF
GURTIX	Marked as charged in CoRE MOF
HAFWAO	Marked as charged in CoRE MOF
HAFWUI	Marked as charged in CoRE MOF
HAFWUI01	Marked as charged in CoRE MOF
HAHPIQ	Marked as charged in CoRE MOF
HAWGIX	Marked as charged in CoRE MOF
HAWWEJ	Marked as charged in CoRE MOF
HEBPUB	Marked as charged in CoRE MOF
HEFDUT	Marked as charged in CoRE MOF
HEFFAB	Marked as charged in CoRE MOF
HEJHAH	Marked as charged in CoRE MOF
HETZUC	Marked as charged in CoRE MOF
HIFZAY	Marked as charged in CoRE MOF
HOXJIO	Marked as charged in CoRE MOF
HUCBAJ	Marked as charged in CoRE MOF
HUKQUZ	Marked as charged in CoRE MOF
HUMQUC	Marked as charged in CoRE MOF
HUZFIS	Marked as charged in CoRE MOF
HUZFOY	Marked as charged in CoRE MOF
IBOWIH	Marked as charged in CoRE MOF
ICITEU	Marked as charged in CoRE MOF
ICITUK	Marked as charged in CoRE MOF
IDAGEA	Marked as charged in CoRE MOF
IFAREN	Marked as charged in CoRE MOF
IFUDAO	Marked as charged in CoRE MOF
IFUDES	Marked as charged in CoRE MOF
IJISOK	Marked as charged in CoRE MOF
IKOSUW	Marked as charged in CoRE MOF
ILAGUY	Marked as charged in CoRE MOF
ILUFEB	Marked as charged in CoRE MOF
IMUVAO	Marked as charged in CoRE MOF
INEBOT	Marked as charged in CoRE MOF
IPICUG	Marked as charged in CoRE MOF
IRAGEN	Marked as charged in CoRE MOF
IRAYUW	Marked as charged in CoRE MOF
IRISAD01	Marked as charged in CoRE MOF
ISAYOQ	Marked as charged in CoRE MOF
ITIWIS	Marked as charged in CoRE MOF
ITIWOY	Marked as charged in CoRE MOF
ITIWUE	Marked as charged in CoRE MOF
IXEDOE	Marked as charged in CoRE MOF
IXEDUK	Marked as charged in CoRE MOF
IXEFAS	Marked as charged in CoRE MOF
IZEFEZ	Marked as charged in CoRE MOF
JACQUA	Marked as charged in CoRE MOF
JEWYAM	Marked as charged in CoRE MOF
JOGDAL	Marked as charged in CoRE MOF
JUPFOP	Marked as charged in CoRE MOF
KAGCAY	Marked as charged in CoRE MOF
KAVJAT	Marked as charged in CoRE MOF
KEBDIG	Marked as charged in CoRE MOF
KEDPEQ	Marked as charged in CoRE MOF
KEFWEZ	Marked as charged in CoRE MOF
KEHGAH	Marked as charged in CoRE MOF
KESBIU	Marked as charged in CoRE MOF
KIBXUP	Marked as charged in CoRE MOF
KIBYAW	Marked as charged in CoRE MOF
KIFJIT	Marked as charged in CoRE MOF
KINNUS	Marked as charged in CoRE MOF
KUBQAA	Marked as charged in CoRE MOF
LAGCON	Marked as charged in CoRE MOF
LAGDAA	Marked as charged in CoRE MOF
LAGDEE	Marked as charged in CoRE MOF
LAJDUV	Marked as charged in CoRE MOF
LAJDUV01	Marked as charged in CoRE MOF
LAJDUV02	Marked as charged in CoRE MOF
LAJDUV03	Marked as charged in CoRE MOF
LARPOL	Marked as charged in CoRE MOF
LECFUW	Marked as charged in CoRE MOF
LEDNEP	Marked as charged in CoRE MOF
LEDNIT	Marked as charged in CoRE MOF
LIKCOY	Marked as charged in CoRE MOF
LIRVAK	Marked as charged in CoRE MOF
LIVTEP	Marked as charged in CoRE MOF
LIZWEX	Marked as charged in CoRE MOF
LUXFEQ	Marked as charged in CoRE MOF
MAFZIE	Marked as charged in CoRE MOF
MALYIJ	Marked as charged in CoRE MOF
MAMVED	Marked as charged in CoRE MOF
MANLIX	Marked as charged in CoRE MOF
MARDAM	Marked as charged in CoRE MOF
MAWFAT	Marked as charged in CoRE MOF
MAXFIA	Marked as charged in CoRE MOF
MEFHUC	Marked as charged in CoRE MOF
MIQLEE	Marked as charged in CoRE MOF
MITSEO	Marked as charged in CoRE MOF
MITSIS	Marked as charged in CoRE MOF
MITTAL	Marked as charged in CoRE MOF
MODMOH	Marked as charged in CoRE MOF
MODMUN	Marked as charged in CoRE MOF
MODNAU	Marked as charged in CoRE MOF
MODNEY	Marked as charged in CoRE MOF
MODPAW	Marked as charged in CoRE MOF
MODPEA	Marked as charged in CoRE MOF
MOXDOT	Marked as charged in CoRE MOF
MOXPEV	Marked as charged in CoRE MOF
MOXPIZ	Marked as charged in CoRE MOF
MOXPOF	Marked as charged in CoRE MOF
MUZHUL	Marked as charged in CoRE MOF
NABCEA	Marked as charged in CoRE MOF
NAJMIV	Marked as charged in CoRE MOF
NAJZII	Marked as charged in CoRE MOF
NANMAS	Marked as charged in CoRE MOF
NANYUX	Marked as charged in CoRE MOF
NANYUX01	Marked as charged in CoRE MOF
NANYUX02	Marked as charged in CoRE MOF
NARHAR	Marked as charged in CoRE MOF
NARHEV	Marked as charged in CoRE MOF
NATNIG	Marked as charged in CoRE MOF
NATNOM	Marked as charged in CoRE MOF
NAYKAB	Marked as charged in CoRE MOF
NEDVOJ	Marked as charged in CoRE MOF
NERNON	Marked as charged in CoRE MOF
NESVAK	Marked as charged in CoRE MOF
NESVEO	Marked as charged in CoRE MOF
NEXDOK	Marked as charged in CoRE MOF
NICZAA01	Marked as charged in CoRE MOF
NIFYOS	Marked as charged in CoRE MOF
NIFYUY	Marked as charged in CoRE MOF
NIFZAF	Marked as charged in CoRE MOF
NIFZEJ	Marked as charged in CoRE MOF
NIFZIN	Marked as charged in CoRE MOF
NIFZOT	Marked as charged in CoRE MOF
NIGHOA	Marked as charged in CoRE MOF
NISPEL	Marked as charged in CoRE MOF
NOQLOV	Marked as charged in CoRE MOF
NOQLOV01	Marked as charged in CoRE MOF
NUFTOY	Marked as charged in CoRE MOF
OBEDAA	Marked as charged in CoRE MOF
OBONUO	Marked as charged in CoRE MOF
OCIYUW	Marked as charged in CoRE MOF
ODAHIK	Marked as charged in CoRE MOF
ODIXAC	Marked as charged in CoRE MOF
OFIWIK	Marked as charged in CoRE MOF
OFIWOQ	Marked as charged in CoRE MOF
OGIYOT	Marked as charged in CoRE MOF
OGIYUZ	Marked as charged in CoRE MOF
OGOJOJ	Marked as charged in CoRE MOF
OGURAK	Marked as charged in CoRE MOF
OJICEQ	Marked as charged in CoRE MOF
OKIJUO	Marked as charged in CoRE MOF
OKIKAV	Marked as charged in CoRE MOF
OKIKEZ	Marked as charged in CoRE MOF
OKITIM	Marked as charged in CoRE MOF
OKITIM01	Marked as charged in CoRE MOF
OKITIM02	Marked as charged in CoRE MOF
OKIVAG	Marked as charged in CoRE MOF
OKIVAG01	Marked as charged in CoRE MOF
OKIVIO	Marked as charged in CoRE MOF
OKIVIO01	Marked as charged in CoRE MOF
OKIVIO02	Marked as charged in CoRE MOF
OKIWEL	Marked as charged in CoRE MOF
OKIWEL01	Marked as charged in CoRE MOF
OKIWEL02	Marked as charged in CoRE MOF
OKIWUB	Marked as charged in CoRE MOF
OKIWUB01	Marked as charged in CoRE MOF
OKIXIQ	Marked as charged in CoRE MOF
OKIXIQ01	Marked as charged in CoRE MOF
OKIXIQ02	Marked as charged in CoRE MOF
OKIYAJ	Marked as charged in CoRE MOF
OKIYIR	Marked as charged in CoRE MOF
OKIYIR01	Marked as charged in CoRE MOF
OKIYIR02	Marked as charged in CoRE MOF
OKIYIR03	Marked as charged in CoRE MOF
OLURUI	Marked as charged in CoRE MOF
OLURUI01	Marked as charged in CoRE MOF
OQIQUB	Marked as charged in CoRE MOF
OQIQUB01	Marked as charged in CoRE MOF
OQIRAI	Marked as charged in CoRE MOF
OSILOS	Marked as charged in CoRE MOF
OTENEH	Marked as charged in CoRE MOF
OXAPEJ	Marked as charged in CoRE MOF
OYUSAD	Marked as charged in CoRE MOF
PADBAZ	Marked as charged in CoRE MOF
PANYOU	Marked as charged in CoRE MOF
PAQVOU	Marked as charged in CoRE MOF
PARKUQ	Marked as charged in CoRE MOF
PAVKIH	Marked as charged in CoRE MOF
PEJMUN	Marked as charged in CoRE MOF
PEJPAX	Marked as charged in CoRE MOF
PEJPEB	Marked as charged in CoRE MOF
PEJPIF	Marked as charged in CoRE MOF
PEJPOL	Marked as charged in CoRE MOF
PELWEK	Marked as charged in CoRE MOF
PEMGIZ	Marked as charged in CoRE MOF
PIBPAS01	Marked as charged in CoRE MOF
PIBPEW	Marked as charged in CoRE MOF
PIBPEW01	Marked as charged in CoRE MOF
POBYAH	Marked as charged in CoRE MOF
POQXAV	Marked as charged in CoRE MOF
PUNSUN	Marked as charged in CoRE MOF
PURTEC	Marked as charged in CoRE MOF
PUSXIL	Marked as charged in CoRE MOF
PUSXIL01	Marked as charged in CoRE MOF
PUTYAE	Marked as charged in CoRE MOF
PUWCEP	Marked as charged in CoRE MOF
PUWDEQ	Marked as charged in CoRE MOF
QAPQAA	Marked as charged in CoRE MOF
QAYTOZ	Marked as charged in CoRE MOF
QEGGUE	Marked as charged in CoRE MOF
QEPZUH	Marked as charged in CoRE MOF
QIBTAW	Marked as charged in CoRE MOF
QIBTEA	Marked as charged in CoRE MOF
QOPCII	Marked as charged in CoRE MOF
QOZFUG	Marked as charged in CoRE MOF
QUGPAJ	Marked as charged in CoRE MOF
QULKIS	Marked as charged in CoRE MOF
QUSBEM	Marked as charged in CoRE MOF
QUSBIQ	Marked as charged in CoRE MOF
QUSFEP	Marked as charged in CoRE MOF
RAFRUL	Marked as charged in CoRE MOF
RAGREY	Marked as charged in CoRE MOF
RATNIL	Marked as charged in CoRE MOF
RAXCEA	Marked as charged in CoRE MOF
RAXROX	Marked as charged in CoRE MOF
REHJEV	Marked as charged in CoRE MOF
REHJIZ	Marked as charged in CoRE MOF
RIDCEN	Marked as charged in CoRE MOF
RIHXIR	Marked as charged in CoRE MOF
RINPEJ	Marked as charged in CoRE MOF
SAHNIZ	Marked as charged in CoRE MOF
SAHYAD	Marked as charged in CoRE MOF
SAHYAD01	Marked as charged in CoRE MOF
SAHYAD02	Marked as charged in CoRE MOF
SAHYAD03	Marked as charged in CoRE MOF
SAHYIL	Marked as charged in CoRE MOF
SAPBIW	Marked as charged in CoRE MOF
SATBIA	Marked as charged in CoRE MOF
SEFNIB	Marked as charged in CoRE MOF
SEMFEX	Marked as charged in CoRE MOF
SEMFIB	Marked as charged in CoRE MOF
SINXET	Marked as charged in CoRE MOF
SIZPAT	Marked as charged in CoRE MOF
SIZPEX	Marked as charged in CoRE MOF
SOCPOQ	Marked as charged in CoRE MOF
SOGWIV	Marked as charged in CoRE MOF
SUKNOC	Marked as charged in CoRE MOF
SUKNUI	Marked as charged in CoRE MOF
SUKPAQ	Marked as charged in CoRE MOF
TALJUM	Marked as charged in CoRE MOF
TAMJAU	Marked as charged in CoRE MOF
TAMJEY	Marked as charged in CoRE MOF
TAMZUE	Marked as charged in CoRE MOF
TANBAN	Marked as charged in CoRE MOF
TANBER	Marked as charged in CoRE MOF
TANBIV	Marked as charged in CoRE MOF
TANLAX	Marked as charged in CoRE MOF
TASJUT	Marked as charged in CoRE MOF
TASYUJ	Marked as charged in CoRE MOF
TASZAQ	Marked as charged in CoRE MOF
TASZEU	Marked as charged in CoRE MOF
TEDGUG	Marked as charged in CoRE MOF
TEYHIP	Marked as charged in CoRE MOF
TICPOL	Marked as charged in CoRE MOF
TIFHAT	Marked as charged in CoRE MOF
TIFHEX	Marked as charged in CoRE MOF
TIMMIM	Marked as charged in CoRE MOF
TIVXOM	Marked as charged in CoRE MOF
TIZVED	Marked as charged in CoRE MOF
TIZVED01	Marked as charged in CoRE MOF
TIZVIH	Marked as charged in CoRE MOF
TIZVIH01	Marked as charged in CoRE MOF
TONBUU	Marked as charged in CoRE MOF
TOVJAP	Marked as charged in CoRE MOF
TUGSOE	Marked as charged in CoRE MOF
UDIHIZ	Marked as charged in CoRE MOF
UDIHOF	Marked as charged in CoRE MOF
UDOVUG	Marked as charged in CoRE MOF
UFASAW	Marked as charged in CoRE MOF
UGOSOY	Marked as charged in CoRE MOF
UGUQOC	Marked as charged in CoRE MOF
UJOWIA	Marked as charged in CoRE MOF
UMARAC	Marked as charged in CoRE MOF
UNABIV	Marked as charged in CoRE MOF
UYOXUC	Marked as charged in CoRE MOF
VAKREG	Marked as charged in CoRE MOF
VAPBAR	Marked as charged in CoRE MOF
VARWES	Marked as charged in CoRE MOF
VARWIW	Marked as charged in CoRE MOF
VAXVEX	Marked as charged in CoRE MOF
VEDDIT	Marked as charged in CoRE MOF
VEFJOG	Marked as charged in CoRE MOF
VEFMAW	Marked as charged in CoRE MOF
VEGMIE	Marked as charged in CoRE MOF
VEGMIE01	Marked as charged in CoRE MOF
VEGMOK	Marked as charged in CoRE MOF
VEGMOK01	Marked as charged in CoRE MOF
VEGMOK02	Marked as charged in CoRE MOF
VEGMOK03	Marked as charged in CoRE MOF
VEGMOK04	Marked as charged in CoRE MOF
VEHKAW	Marked as charged in CoRE MOF
VEHKOK	Marked as charged in CoRE MOF
VEHNAZ	Marked as charged in CoRE MOF
VEHROR	Marked as charged in CoRE MOF
VEPDEB	Marked as charged in CoRE MOF
VEQBOJ	Marked as charged in CoRE MOF
VEQBUP	Marked as charged in CoRE MOF
VEQCAW	Marked as charged in CoRE MOF
VEQCEA	Marked as charged in CoRE MOF
VETSOE	Marked as charged in CoRE MOF
VETTAR	Marked as charged in CoRE MOF
VETTIZ	Marked as charged in CoRE MOF
VEXYON	Marked as charged in CoRE MOF
VINHEH	Marked as charged in CoRE MOF
VUQLEZ	Marked as charged in CoRE MOF
VUSQIK	Marked as charged in CoRE MOF
WAHNUQ	Marked as charged in CoRE MOF
WAJLEA	Marked as charged in CoRE MOF
WAQDOJ	Marked as charged in CoRE MOF
WEBKIX	Marked as charged in CoRE MOF
WEBLAQ	Marked as charged in CoRE MOF
WEBZEK	Marked as charged in CoRE MOF
WEGDIX	Marked as charged in CoRE MOF
WEHPIJ	Marked as charged in CoRE MOF
WEHPOP	Marked as charged in CoRE MOF
WEHQAC	Marked as charged in CoRE MOF
WEHQEG	Marked as charged in CoRE MOF
WEHRIL	Marked as charged in CoRE MOF
WELTUD	Marked as charged in CoRE MOF
WEMJII	Marked as charged in CoRE MOF
WIKXUJ	Marked as charged in CoRE MOF
WILGEE	Marked as charged in CoRE MOF
WIYMOG	Marked as charged in CoRE MOF
WOCJII	Marked as charged in CoRE MOF
WOMFIO	Marked as charged in CoRE MOF
WOQDUB	Marked as charged in CoRE MOF
WOWHIZ	Marked as charged in CoRE MOF
WOZSOT	Marked as charged in CoRE MOF
WUNSEE	Marked as charged in CoRE MOF
WUNSEE01	Marked as charged in CoRE MOF
WUNSEE02	Marked as charged in CoRE MOF
WUNSII	Marked as charged in CoRE MOF
WUNSII01	Marked as charged in CoRE MOF
WUNSII02	Marked as charged in CoRE MOF
WUNTAB	Marked as charged in CoRE MOF
WUNVEH	Marked as charged in CoRE MOF
WUNVIL	Marked as charged in CoRE MOF
WUWQUB	Marked as charged in CoRE MOF
WUWRAI	Marked as charged in CoRE MOF
XACFEN	Marked as charged in CoRE MOF
XACGIT	Marked as charged in CoRE MOF
XAYMUF	Marked as charged in CoRE MOF
XAYNAM	Marked as charged in CoRE MOF
XAZGAG	Marked as charged in CoRE MOF
XICDUI	Marked as charged in CoRE MOF
XOJPIW	Marked as charged in CoRE MOF
XOJWID	Marked as charged in CoRE MOF
XOJXAW	Marked as charged in CoRE MOF
XOTKIA	Marked as charged in CoRE MOF
XUVGUQ	Marked as charged in CoRE MOF
YAPRUE	Marked as charged in CoRE MOF
YAPSAL	Marked as charged in CoRE MOF
YARGIJ	Marked as charged in CoRE MOF
YAWFEI	Marked as charged in CoRE MOF
YAYPAR	Marked as charged in CoRE MOF
YECNEB	Marked as charged in CoRE MOF
YEMLUY	Marked as charged in CoRE MOF
YOMBAE	Marked as charged in CoRE MOF
YOZQAG	Marked as charged in CoRE MOF
YUNKIC	Marked as charged in CoRE MOF
ZARLUB	Marked as charged in CoRE MOF
ZAXQUM	Marked as charged in CoRE MOF
ZAYJOA	Marked as charged in CoRE MOF
ZAYKAN	Marked as charged in CoRE MOF
ZAYKER	Marked as charged in CoRE MOF
ZEDVIP	Marked as charged in CoRE MOF
ZEDVOV	Marked as charged in CoRE MOF
ZEDVUB	Marked as charged in CoRE MOF
ZEDWAI	Marked as charged in CoRE MOF
ZUQVAI	Marked as charged in CoRE MOF
ZUQVEM	Marked as charged in CoRE MOF
ZUQVIQ	Marked as charged in CoRE MOF
ZUQVOW	Marked as charged in CoRE MOF
LETQAE01	Voronoi decomposition fails in Zeo++
ARIBOS	Pore window diameter is smaller than 2.5 A
GUXLIU	Pore window diameter is smaller than 2.5 A
YAYLIV	Pore window diameter is smaller than 2.5 A
MUPYIG	Pore window diameter is smaller than 2.5 A
XOLYUS	Pore window diameter is smaller than 2.5 A
FAPYEA04	Pore window diameter is smaller than 2.5 A
NERVIP	Pore window diameter is smaller than 2.5 A
HEBGUS	Pore window diameter is smaller than 2.5 A
LIFQIC	Pore window diameter is smaller than 2.5 A
GELVID01	Pore window diameter is smaller than 2.5 A
WUDNAK	Pore window diameter is smaller than 2.5 A
JETNOL	Pore window diameter is smaller than 2.5 A
UJEFOE	Pore window diameter is smaller than 2.5 A
QUJFUX	Pore window diameter is smaller than 2.5 A
ODELOZ	Pore window diameter is smaller than 2.5 A
KIRKAZ	Pore window diameter is smaller than 2.5 A
RARYOZ	Pore window diameter is smaller than 2.5 A
ZIDDIB	Pore window diameter is smaller than 2.5 A
VAZLOZ	Pore window diameter is smaller than 2.5 A
WIJDID	Pore window diameter is smaller than 2.5 A
VAZMOA	Pore window diameter is smaller than 2.5 A
QQQGTA02	Pore window diameter is smaller than 2.5 A
KAVLID	Pore window diameter is smaller than 2.5 A
ACALIB	Pore window diameter is smaller than 2.5 A
LERNAY02	Pore window diameter is smaller than 2.5 A
PURQID	Pore window diameter is smaller than 2.5 A
ECOTOG	Pore window diameter is smaller than 2.5 A
CAXPIC	Pore window diameter is smaller than 2.5 A
DEZKEA	Pore window diameter is smaller than 2.5 A
EVOMOR01	Pore window diameter is smaller than 2.5 A
DOQRUW	Pore window diameter is smaller than 2.5 A
QQQGTA01	Pore window diameter is smaller than 2.5 A
VAZLIT	Pore window diameter is smaller than 2.5 A
DUQCAU	Pore window diameter is smaller than 2.5 A
NAXLEF	Pore window diameter is smaller than 2.5 A
EBOTOF	Pore window diameter is smaller than 2.5 A
WAHMEY01	Pore window diameter is smaller than 2.5 A
MOCJIY	Pore window diameter is smaller than 2.5 A
IFAQUC	Pore window diameter is smaller than 2.5 A
EMOSOP	Pore window diameter is smaller than 2.5 A
ELAFUT	Pore window diameter is smaller than 2.5 A
SARMOO	Pore window diameter is smaller than 2.5 A
XUJCUB	Pore window diameter is smaller than 2.5 A
LEGGOU	Pore window diameter is smaller than 2.5 A
NIMVEL	Pore window diameter is smaller than 2.5 A
TATSIS	Pore window diameter is smaller than 2.5 A
DUQCAU01	Pore window diameter is smaller than 2.5 A
DENKOX	Pore window diameter is smaller than 2.5 A
LEWVAL	Pore window diameter is smaller than 2.5 A
HABRIN	Pore window diameter is smaller than 2.5 A
GELVID	Pore window diameter is smaller than 2.5 A
PERSEM	Pore window diameter is smaller than 2.5 A
LIHSEB	Pore window diameter is smaller than 2.5 A
ISIKIF	Pore window diameter is smaller than 2.5 A
WENSIS	Pore window diameter is smaller than 2.5 A
IYUHIU	Pore window diameter is smaller than 2.5 A
ABAVOP	Pore window diameter is smaller than 2.5 A
YAFGAP	Pore window diameter is smaller than 2.5 A
VAZMIU	Pore window diameter is smaller than 2.5 A
XIHXAP	Pore window diameter is smaller than 2.5 A
NUYWEK	Pore window diameter is smaller than 2.5 A
NARTUX	Pore window diameter is smaller than 2.5 A
PAPPED	Pore window diameter is smaller than 2.5 A
QQQGTA03	Pore window diameter is smaller than 2.5 A
YEMLOS	Pore window diameter is smaller than 2.5 A
MUFJAZ	Pore window diameter is smaller than 2.5 A
ZIBGIC	Pore window diameter is smaller than 2.5 A
WIFGOJ	Pore window diameter is smaller than 2.5 A
CATART03	Pore window diameter is smaller than 2.5 A
EVOMOR	Pore window diameter is smaller than 2.5 A
OFUSEP	Pore window diameter is smaller than 2.5 A
WOGLAG	Pore window diameter is smaller than 2.5 A
BEVQUP	Pore window diameter is smaller than 2.5 A
IDAZEU	Pore window diameter is smaller than 2.5 A
VAZLEP	Pore window diameter is smaller than 2.5 A
LERNAY01	Pore window diameter is smaller than 2.5 A
LAGRES	Pore window diameter is smaller than 2.5 A
PARFOF	Pore window diameter is smaller than 2.5 A
EQOCIW	Pore window diameter is smaller than 2.5 A
KIYMIP	Pore window diameter is smaller than 2.5 A
LELCUB01	Pore window diameter is smaller than 2.5 A
LEHTID	Pore window diameter is smaller than 2.5 A
TAPKAY	Pore window diameter is smaller than 2.5 A
VAZMEQ	Pore window diameter is smaller than 2.5 A
CEHWOD	Pore window diameter is smaller than 2.5 A
PEVJOQ	Pore window diameter is smaller than 2.5 A
AVESAW	Pore window diameter is smaller than 2.5 A
HUTZEB	Pore window diameter is smaller than 2.5 A
XAFNOH01	Pore window diameter is smaller than 2.5 A
XAFNOH	Pore window diameter is smaller than 2.5 A
WOWGEU	Pore window diameter is smaller than 2.5 A
OSOMIT	Pore window diameter is smaller than 2.5 A
MOCJEU	Pore window diameter is smaller than 2.5 A
ISIMAZ	Pore window diameter is smaller than 2.5 A
EQOCES	Pore window diameter is smaller than 2.5 A
FATBAE	Pore window diameter is smaller than 2.5 A
MOCJAQ	Pore window diameter is smaller than 2.5 A
CEHZAR01	Pore window diameter is smaller than 2.5 A
PEPXIS	Pore window diameter is smaller than 2.5 A
JOJMEB	Pore window diameter is smaller than 2.5 A
YACHUH	Pore window diameter is smaller than 2.5 A
QEYWUN	Pore window diameter is smaller than 2.5 A
CAXPEY	Pore window diameter is smaller than 2.5 A
LANCOU	Pore window diameter is smaller than 2.5 A
UPOVOL	Pore window diameter is smaller than 2.5 A
NIMVIP	Pore window diameter is smaller than 2.5 A
OTOROF	Pore window diameter is smaller than 2.5 A
LERNAY	Pore window diameter is smaller than 2.5 A
LIHRIE	Pore window diameter is smaller than 2.5 A
VEGXUC	Pore window diameter is smaller than 2.5 A
POJTOY01	Pore window diameter is smaller than 2.5 A
OPOYUO	Pore window diameter is smaller than 2.5 A
RESWUI	Pore window diameter is smaller than 2.5 A
CEHZAR	Pore window diameter is smaller than 2.5 A
FAKGOP	Pore window diameter is smaller than 2.5 A
NIMTEJ	Pore window diameter is smaller than 2.5 A
XEQLEM	Pore window diameter is smaller than 2.5 A
COMGUH	Pore window diameter is smaller than 2.5 A
YAFDAM	Pore window diameter is smaller than 2.5 A
SIBMIB	Pore window diameter is smaller than 2.5 A
VEGXOW	Pore window diameter is smaller than 2.5 A
MOQSIV	Pore window diameter is smaller than 2.5 A
DITYAH	Pore window diameter is smaller than 2.5 A
PULDOQ	Pore window diameter is smaller than 2.5 A
KAPHAL	Pore window diameter is smaller than 2.5 A
GIKMOD01	Pore window diameter is smaller than 2.5 A
XAWZOM	Pore window diameter is smaller than 2.5 A
HABZEQ	Pore window diameter is smaller than 2.5 A
XAQMOS	Pore window diameter is smaller than 2.5 A
MIVPIR	Pore window diameter is smaller than 2.5 A
VEJYUF02	Pore window diameter is smaller than 2.5 A
ANEPIT	Pore window diameter is smaller than 2.5 A
VAZMAM	Pore window diameter is smaller than 2.5 A
VEGXIQ01	Pore window diameter is smaller than 2.5 A
HURNOX	Pore window diameter is smaller than 2.5 A
QIVBUT	Pore window diameter is smaller than 2.5 A
QUPZAC	Pore window diameter is smaller than 2.5 A
MIGVON	Pore window diameter is smaller than 2.5 A
ZEFVEN	Pore window diameter is smaller than 2.5 A
DAXGUG	Pore window diameter is smaller than 2.5 A
VOCKUT	Pore window diameter is smaller than 2.5 A
ABAVIJ	Pore window diameter is smaller than 2.5 A
MIVPEN	Pore window diameter is smaller than 2.5 A
XEZPUP	Pore window diameter is smaller than 2.5 A
AROFAP	Pore window diameter is larger than 4.3 A
CUKXUC	Pore window diameter is larger than 4.3 A
KEYDEZ	Pore window diameter is larger than 4.3 A
OFEHAK	Pore window diameter is larger than 4.3 A
VUHJAK	Pore window diameter is larger than 4.3 A
ILIFUE	Pore window diameter is larger than 4.3 A
MAPFIS	Pore window diameter is larger than 4.3 A
ENAFAB	Pore window diameter is larger than 4.3 A
YOZCAS	Pore window diameter is larger than 4.3 A
MACKAE	Pore window diameter is larger than 4.3 A
VUQKAU02	Pore window diameter is larger than 4.3 A
QATLEE	Pore window diameter is larger than 4.3 A
GAMXAV	Pore window diameter is larger than 4.3 A
BETFAJ	Pore window diameter is larger than 4.3 A
BETFEN	Pore window diameter is larger than 4.3 A
LAGNAK	Pore window diameter is larger than 4.3 A
RAXYOF	Pore window diameter is larger than 4.3 A
XEGJIE	Pore window diameter is larger than 4.3 A
PEBXIF	Pore window diameter is larger than 4.3 A
XEDPON	Pore window diameter is larger than 4.3 A
TEMPAE	Pore window diameter is larger than 4.3 A
GIYTAK	Pore window diameter is larger than 4.3 A
XUMFIV	Pore window diameter is larger than 4.3 A
YABPAU	Pore window diameter is larger than 4.3 A
WEMFOL	Pore window diameter is larger than 4.3 A
FAPTIB	Pore window diameter is larger than 4.3 A
MEFYUT	Pore window diameter is larger than 4.3 A
IXISOX	Pore window diameter is larger than 4.3 A
IKETAU	Pore window diameter is larger than 4.3 A
QUQPOI	Pore window diameter is larger than 4.3 A
HAPVEB	Pore window diameter is larger than 4.3 A
BIFKEI	Pore window diameter is larger than 4.3 A
HICVOG	Pore window diameter is larger than 4.3 A
EBIJAC	Pore window diameter is larger than 4.3 A
YUKKAR	Pore window diameter is larger than 4.3 A
FOXNIQ	Pore window diameter is larger than 4.3 A
YAYLER	Pore window diameter is larger than 4.3 A
WEMFIF	Pore window diameter is larger than 4.3 A
BETDAH	Pore window diameter is larger than 4.3 A
VIFBOD	Pore window diameter is larger than 4.3 A
GOJDOZ	Pore window diameter is larger than 4.3 A
OBUFEX	Pore window diameter is larger than 4.3 A
CAYMIZ	Pore window diameter is larger than 4.3 A
ILIFOY	Pore window diameter is larger than 4.3 A
WEMDUP	Pore window diameter is larger than 4.3 A
CEJZAU	Pore window diameter is larger than 4.3 A
RAVJOP	Pore window diameter is larger than 4.3 A
UGUHAG	Pore window diameter is larger than 4.3 A
DUXZIG01	Pore window diameter is larger than 4.3 A
FIHFAF	Pore window diameter is larger than 4.3 A
HAPVAX	Pore window diameter is larger than 4.3 A
LECFEG	Pore window diameter is larger than 4.3 A
WEMFEB	Pore window diameter is larger than 4.3 A
DAWCAH	Pore window diameter is larger than 4.3 A
LAGCAZ	Pore window diameter is larger than 4.3 A
WEMFAX	Pore window diameter is larger than 4.3 A
ENISUQ	Pore window diameter is larger than 4.3 A
EBUQIB	Pore window diameter is larger than 4.3 A
DAWCOV	Pore window diameter is larger than 4.3 A
TARVOX	Pore window diameter is larger than 4.3 A
PEWXUL	Pore window diameter is larger than 4.3 A
AVIMOI	Pore window diameter is larger than 4.3 A
DAYYIN	Pore window diameter is larger than 4.3 A
INIRAY01	Pore window diameter is larger than 4.3 A
ICORAV	Pore window diameter is larger than 4.3 A
DAPYAW	Pore window diameter is larger than 4.3 A
NAYXOC	Pore window diameter is larger than 4.3 A
EDEPAG	Pore window diameter is larger than 4.3 A
QUTTII	Pore window diameter is larger than 4.3 A
WEMDOJ	Pore window diameter is larger than 4.3 A
EFOTEZ	Pore window diameter is larger than 4.3 A
RUMWUS	Pore window diameter is larger than 4.3 A
CIJVOH	Pore window diameter is larger than 4.3 A
VAGTAA	Pore window diameter is larger than 4.3 A
WEMDID	Pore window diameter is larger than 4.3 A
VAHQAY	Pore window diameter is larger than 4.3 A
NULMAJ	Pore window diameter is larger than 4.3 A
OYUJUO	Pore window diameter is larger than 4.3 A
RIVDEF	Pore window diameter is larger than 4.3 A
FAZZEM	Pore window diameter is larger than 4.3 A
DAWBUA	Pore window diameter is larger than 4.3 A
SOBZOY	Pore window diameter is larger than 4.3 A
RUVMAX	Pore window diameter is larger than 4.3 A
TISHAF	Pore window diameter is larger than 4.3 A
VAHPUR	Pore window diameter is larger than 4.3 A
IXISAJ	Pore window diameter is larger than 4.3 A
DEPXIG	Pore window diameter is larger than 4.3 A
TENLIJ	Pore window diameter is larger than 4.3 A
ALUJEX	Pore window diameter is larger than 4.3 A
DARCUW	Pore window diameter is larger than 4.3 A
EZUCIM	Pore window diameter is larger than 4.3 A
ALUJIB	Pore window diameter is larger than 4.3 A
KIFKEQ	Pore window diameter is larger than 4.3 A
FIFMOY	Pore window diameter is larger than 4.3 A
IZEBAR	Pore window diameter is larger than 4.3 A
UKUCAF	Pore window diameter is larger than 4.3 A
PIDMEV	Pore window diameter is larger than 4.3 A
VIRPOC	Pore window diameter is larger than 4.3 A
OHAKIS	Pore window diameter is larger than 4.3 A
FUWXOL	Pore window diameter is larger than 4.3 A
CANRIU	Pore window diameter is larger than 4.3 A
LAGPAM	Pore window diameter is larger than 4.3 A
CIJVOH01	Pore window diameter is larger than 4.3 A
LECFAC	Pore window diameter is larger than 4.3 A
EBUREA	Pore window diameter is larger than 4.3 A
ZAVPIX	Pore window diameter is larger than 4.3 A
DEYVUA	Pore window diameter is larger than 4.3 A
EFOSUO	Pore window diameter is larger than 4.3 A
WOHDON	Pore window diameter is larger than 4.3 A
DARFOT	Pore window diameter is larger than 4.3 A
BEPVEZ	Pore window diameter is larger than 4.3 A
ALUJOH	Pore window diameter is larger than 4.3 A
MALYOP	Pore window diameter is larger than 4.3 A
FAZFET	Pore window diameter is larger than 4.3 A
GENGIR	Pore window diameter is larger than 4.3 A
RUPRUQ	Pore window diameter is larger than 4.3 A
VULKIX	Pore window diameter is larger than 4.3 A
VUQKAU	Pore window diameter is larger than 4.3 A
DARFIN	Pore window diameter is larger than 4.3 A
DARFEJ	Pore window diameter is larger than 4.3 A
XADDAJ	Pore window diameter is larger than 4.3 A
UMEXUF	Pore window diameter is larger than 4.3 A
OBODEQ	Pore window diameter is larger than 4.3 A
FIJFUA	Pore window diameter is larger than 4.3 A
LASMAV	Pore window diameter is larger than 4.3 A
DARDAD	Pore window diameter is larger than 4.3 A
WAVQUH	Pore window diameter is larger than 4.3 A
QUDJIJ	Pore window diameter is larger than 4.3 A
WECFAN	Pore window diameter is larger than 4.3 A
UKUBUY	Pore window diameter is larger than 4.3 A
GEWXAJ	Pore window diameter is larger than 4.3 A
AMOYOR	Pore window diameter is larger than 4.3 A
ROGSAI	Pore window diameter is larger than 4.3 A
LIDWIG	Pore window diameter is larger than 4.3 A
FIFMIS01	Pore window diameter is larger than 4.3 A
IBOZIK	Pore window diameter is larger than 4.3 A
QESYOD	Pore window diameter is larger than 4.3 A
EZOBUR02	Pore window diameter is larger than 4.3 A
HIFTUM	Pore window diameter is larger than 4.3 A
IWELIG01	Pore window diameter is larger than 4.3 A
MICDEJ	Pore window diameter is larger than 4.3 A
EFOTAV	Pore window diameter is larger than 4.3 A
PAMHIW	Pore window diameter is larger than 4.3 A
VEHKIE	Pore window diameter is larger than 4.3 A
KICXEB	Pore window diameter is larger than 4.3 A
MADWAQ	Pore window diameter is larger than 4.3 A
FINQUQ	Pore window diameter is larger than 4.3 A
FIFMIS	Pore window diameter is larger than 4.3 A
MOBBIO	Pore window diameter is larger than 4.3 A
PASTOU	Pore window diameter is larger than 4.3 A
UKUBOS	Pore window diameter is larger than 4.3 A
DARDOR	Pore window diameter is larger than 4.3 A
IWELIG	Pore window diameter is larger than 4.3 A
FALVOF	Pore window diameter is larger than 4.3 A
DODMIT	Pore window diameter is larger than 4.3 A
AFIXAO	Pore window diameter is larger than 4.3 A
DARCOQ	Pore window diameter is larger than 4.3 A
CELZEA	Pore window diameter is larger than 4.3 A
GAXQIH	Pore window diameter is larger than 4.3 A
ODODES	Pore window diameter is larger than 4.3 A
MEFJUE	Pore window diameter is larger than 4.3 A
QAMVEH	Pore window diameter is larger than 4.3 A
EYUWAW	Pore window diameter is larger than 4.3 A
KALFIO	Pore window diameter is larger than 4.3 A
INIQUR	Pore window diameter is larger than 4.3 A
HEDBUP	Pore window diameter is larger than 4.3 A
ACUTOI	Pore window diameter is larger than 4.3 A
QUDJOP	Pore window diameter is larger than 4.3 A
CUVGOQ	Pore window diameter is larger than 4.3 A
NEJSOM	Pore window diameter is larger than 4.3 A
XOHLEM01	Pore window diameter is larger than 4.3 A
XOHLEM	Pore window diameter is larger than 4.3 A
NOHFOG	Pore window diameter is larger than 4.3 A
DEFKUU	Pore window diameter is larger than 4.3 A
ENISOK	Pore window diameter is larger than 4.3 A
QUFTAM	Pore window diameter is larger than 4.3 A
DARDIL	Pore window diameter is larger than 4.3 A
GOKBUE	Pore window diameter is larger than 4.3 A
YEVQOG	Pore window diameter is larger than 4.3 A
HEDBOJ	Pore window diameter is larger than 4.3 A
LIFWOO	Pore window diameter is larger than 4.3 A
REZVAU	Pore window diameter is larger than 4.3 A
LUNBEB	Pore window diameter is larger than 4.3 A
OQESEJ	Pore window diameter is larger than 4.3 A
BEKYOG	Pore window diameter is larger than 4.3 A
XOJWEZ	Pore window diameter is larger than 4.3 A
RASKIH	Pore window diameter is larger than 4.3 A
LETROT	Pore window diameter is larger than 4.3 A
CIWYUD	Pore window diameter is larger than 4.3 A
OFODET	Pore window diameter is larger than 4.3 A
KICXAX	Pore window diameter is larger than 4.3 A
ZEDZAL	Pore window diameter is larger than 4.3 A
OSAWEL	Pore window diameter is larger than 4.3 A
LAYGAV	Pore window diameter is larger than 4.3 A
UWELIS	Pore window diameter is larger than 4.3 A
DARDUX	Pore window diameter is larger than 4.3 A
DARFAF	Pore window diameter is larger than 4.3 A
UKUBIM	Pore window diameter is larger than 4.3 A
MIFKUJ	Pore window diameter is larger than 4.3 A
DEJCIF	Pore window diameter is larger than 4.3 A
EZOFEF	Pore window diameter is larger than 4.3 A
VEWXAY	Pore window diameter is larger than 4.3 A
CUYWUP	Pore window diameter is larger than 4.3 A
SAMLAV02	Pore window diameter is larger than 4.3 A
AFUPEX	Pore window diameter is larger than 4.3 A
VILXOE	Pore window diameter is larger than 4.3 A
QAMVEH01	Pore window diameter is larger than 4.3 A
BASJUB	Pore window diameter is larger than 4.3 A
VAZROF	Pore window diameter is larger than 4.3 A
FUNBAS	Pore window diameter is larger than 4.3 A
FECXAO	Pore window diameter is larger than 4.3 A
SEHTAB	Pore window diameter is larger than 4.3 A
ODODIW	Pore window diameter is larger than 4.3 A
SAMLAV03	Pore window diameter is larger than 4.3 A
NIGGIU	Pore window diameter is larger than 4.3 A
DAWBIO	Pore window diameter is larger than 4.3 A
OQEROS	Pore window diameter is larger than 4.3 A
FINQOK	Pore window diameter is larger than 4.3 A
NASDIW	Pore window diameter is larger than 4.3 A
SEHSUU	Pore window diameter is larger than 4.3 A
GINLIA	Pore window diameter is larger than 4.3 A
ICIVAS	Pore window diameter is larger than 4.3 A
ACMPCD	Pore window diameter is larger than 4.3 A
TONBII	Pore window diameter is larger than 4.3 A
PEWXUL01	Pore window diameter is larger than 4.3 A
XEQRAO	Pore window diameter is larger than 4.3 A
YUPSIM	Pore window diameter is larger than 4.3 A
GAYGAQ	Pore window diameter is larger than 4.3 A
GEVXIQ	Pore window diameter is larger than 4.3 A
ASADAA	Pore window diameter is larger than 4.3 A
IWELOM	Pore window diameter is larger than 4.3 A
DARDEH	Pore window diameter is larger than 4.3 A
SEHTEF	Pore window diameter is larger than 4.3 A
NEHNEV	Pore window diameter is larger than 4.3 A
TEFWOR	Pore window diameter is larger than 4.3 A
RIWSUM	Pore window diameter is larger than 4.3 A
SEHSOO	Pore window diameter is larger than 4.3 A
BURJOO	Pore window diameter is larger than 4.3 A
KALGEL	Pore window diameter is larger than 4.3 A
OYEJOS	Pore window diameter is larger than 4.3 A
NIGFUF	Pore window diameter is larger than 4.3 A
RATSAI	Pore window diameter is larger than 4.3 A
RATRUB	Pore window diameter is larger than 4.3 A
NIGGEQ	Pore window diameter is larger than 4.3 A
LAGNEO	Pore window diameter is larger than 4.3 A
IXAJUN	Pore window diameter is larger than 4.3 A
TEDLUK	Pore window diameter is larger than 4.3 A
SEFSOM	Pore window diameter is larger than 4.3 A
XIBZUF	Pore window diameter is larger than 4.3 A
LOFVUY	Pore window diameter is larger than 4.3 A
PEGCIP	Pore window diameter is larger than 4.3 A
NIGGAM	Pore window diameter is larger than 4.3 A
IZUMUM	Pore window diameter is larger than 4.3 A
NIGFIT	Pore window diameter is larger than 4.3 A
NIGFOZ	Pore window diameter is larger than 4.3 A
EBOJOV	Pore window diameter is larger than 4.3 A
QAQRUW01	Pore window diameter is larger than 4.3 A
QAQRUW	Pore window diameter is larger than 4.3 A
LUNBAX	Pore window diameter is larger than 4.3 A
FUSWIA	Pore window diameter is larger than 4.3 A
HIHGIQ	Pore window diameter is larger than 4.3 A
QOZDOY	Pore window diameter is larger than 4.3 A
DAWBOU	Pore window diameter is larger than 4.3 A
ACODON	Pore window diameter is larger than 4.3 A
PIHJOH	Pore window diameter is larger than 4.3 A
MEXJAC	Pore window diameter is larger than 4.3 A
RIXBIK	Pore window diameter is larger than 4.3 A
XUGWUS	Pore window diameter is larger than 4.3 A
KIFJUF	Pore window diameter is larger than 4.3 A
DEYLUQ	Pore window diameter is larger than 4.3 A
LOFVUY01	Pore window diameter is larger than 4.3 A
XOPVII	Pore window diameter is larger than 4.3 A
UWUTIQ	Pore window diameter is larger than 4.3 A
HAZSIL	Pore window diameter is larger than 4.3 A
VATYEV	Pore window diameter is larger than 4.3 A
GEDQOX	Pore window diameter is larger than 4.3 A
EBETOW	Pore window diameter is larger than 4.3 A
LIBZIG	Pore window diameter is larger than 4.3 A
NERMON	Pore window diameter is larger than 4.3 A
LUSHUD	Pore window diameter is larger than 4.3 A
MADVUJ	Pore window diameter is larger than 4.3 A
DEPXOM	Pore window diameter is larger than 4.3 A
VETTOE	Pore window diameter is larger than 4.3 A
KEDQAN	Pore window diameter is larger than 4.3 A
XEJVOZ	Pore window diameter is larger than 4.3 A
COGNAO	Pore window diameter is larger than 4.3 A
NADZID	Pore window diameter is larger than 4.3 A
YEQRER	Pore window diameter is larger than 4.3 A
QUNMUI	Pore window diameter is larger than 4.3 A
UVUQAE	Pore window diameter is larger than 4.3 A
DIBJEF	Pore window diameter is larger than 4.3 A
ETEKAQ01	Pore window diameter is larger than 4.3 A
BEXRUT	Pore window diameter is larger than 4.3 A
DIXKOL	Pore window diameter is larger than 4.3 A
RABHAZ	Pore window diameter is larger than 4.3 A
PEYSIW	Pore window diameter is larger than 4.3 A
CURBOH	Pore window diameter is larger than 4.3 A
BEXSAA	Pore window diameter is larger than 4.3 A
BETZOR	Pore window diameter is larger than 4.3 A
FEYJOJ	Pore window diameter is larger than 4.3 A
PEJMOI	Pore window diameter is larger than 4.3 A
HURGOR	Pore window diameter is larger than 4.3 A
CAWVIH	Pore window diameter is larger than 4.3 A
DUBWON	Pore window diameter is larger than 4.3 A
HIFGOU	Pore window diameter is larger than 4.3 A
TERNUA	Pore window diameter is larger than 4.3 A
CIJBEE	Pore window diameter is larger than 4.3 A
FIVYEP	Pore window diameter is larger than 4.3 A
SIQQEO	Pore window diameter is larger than 4.3 A
FIVYEP01	Pore window diameter is larger than 4.3 A
ZEZPUR	Pore window diameter is larger than 4.3 A
UJARAZ	Pore window diameter is larger than 4.3 A
HEGJUZ	Pore window diameter is larger than 4.3 A
QAVWAN	Pore window diameter is larger than 4.3 A
BEYSEF	Pore window diameter is larger than 4.3 A
AFIXES	Pore window diameter is larger than 4.3 A
IYUQEZ	Pore window diameter is larger than 4.3 A
ENIXUV	Pore window diameter is larger than 4.3 A
FAYPEC	Pore window diameter is larger than 4.3 A
HIHGOW	Pore window diameter is larger than 4.3 A
ULUVUT	Pore window diameter is larger than 4.3 A
ZEZQAY	Pore window diameter is larger than 4.3 A
LUMZUO	Pore window diameter is larger than 4.3 A
ZEZQEC	Pore window diameter is larger than 4.3 A
KEWZOD	Pore window diameter is larger than 4.3 A
IVEGEV	Pore window diameter is larger than 4.3 A
AFUKET	Pore window diameter is larger than 4.3 A
PEQRUZ	Pore window diameter is larger than 4.3 A
CUVXAT	Pore window diameter is larger than 4.3 A
XAPTUE	Pore window diameter is larger than 4.3 A
ETEJIX01	Pore window diameter is larger than 4.3 A
OYIVEY	Pore window diameter is larger than 4.3 A
NEHZIK	Pore window diameter is larger than 4.3 A
LODPUQ	Pore window diameter is larger than 4.3 A
INIRAY	Pore window diameter is larger than 4.3 A
DIPMAS	Pore window diameter is larger than 4.3 A
CADQAB	Pore window diameter is larger than 4.3 A
ECIWOC	Pore window diameter is larger than 4.3 A
UKAQIH	Pore window diameter is larger than 4.3 A
KALGAH	Pore window diameter is larger than 4.3 A
NOCLOH	Pore window diameter is larger than 4.3 A
WEFXEM	Pore window diameter is larger than 4.3 A
XEYMAR	Pore window diameter is larger than 4.3 A
NEGGOX	Pore window diameter is larger than 4.3 A
QETCUO	Pore window diameter is larger than 4.3 A
QOMFEE	Pore window diameter is larger than 4.3 A
BEXSII	Pore window diameter is larger than 4.3 A
EHODOV	Pore window diameter is larger than 4.3 A
UKAQED	Pore window diameter is larger than 4.3 A
ZEZQIG	Pore window diameter is larger than 4.3 A
YEQRIV	Pore window diameter is larger than 4.3 A
KALFOU	Pore window diameter is larger than 4.3 A
HIFWAV	Pore window diameter is larger than 4.3 A
VODSEM	Pore window diameter is larger than 4.3 A
UKAQAZ	Pore window diameter is larger than 4.3 A
ZEKRIS	Pore window diameter is larger than 4.3 A
LEJBUX	Pore window diameter is larger than 4.3 A
CADQOP	Pore window diameter is larger than 4.3 A
VAHVOR	Pore window diameter is larger than 4.3 A
XAFXOT	Pore window diameter is larger than 4.3 A
OQEPUW	Pore window diameter is larger than 4.3 A
VUDQOB	Pore window diameter is larger than 4.3 A
IBIYOI	Pore window diameter is larger than 4.3 A
OQESAF	Pore window diameter is larger than 4.3 A
NOCLOH01	Pore window diameter is larger than 4.3 A
MOGNAY	Pore window diameter is larger than 4.3 A
UCEXOQ	Pore window diameter is larger than 4.3 A
FAMGAD	Pore window diameter is larger than 4.3 A
PAPRUU	Pore window diameter is larger than 4.3 A
UCEXEG	Pore window diameter is larger than 4.3 A
NOCLOH02	Pore window diameter is larger than 4.3 A
LASWEJ	Pore window diameter is larger than 4.3 A
YEGCUJ	Pore window diameter is larger than 4.3 A
MAKXAZ	Pore window diameter is larger than 4.3 A
DANZOJ	Pore window diameter is larger than 4.3 A
ODODOC	Pore window diameter is larger than 4.3 A
TASXIW	Pore window diameter is larger than 4.3 A
ILOJOJ	Pore window diameter is larger than 4.3 A
UKAPUS	Pore window diameter is larger than 4.3 A
RIFSOQ	Pore window diameter is larger than 4.3 A
JITPOS	Pore window diameter is larger than 4.3 A
XILVIZ	Pore window diameter is larger than 4.3 A
QEBGEL	Pore window diameter is larger than 4.3 A
LODPOK	Pore window diameter is larger than 4.3 A
LAGNUE	Pore window diameter is larger than 4.3 A
REJLEY	Pore window diameter is larger than 4.3 A
MARPOL	Pore window diameter is larger than 4.3 A
MIKJAR	Pore window diameter is larger than 4.3 A
UCEXAC	Pore window diameter is larger than 4.3 A
UCEXIK	Pore window diameter is larger than 4.3 A
PIZNOB	Pore window diameter is larger than 4.3 A
VATYAR	Pore window diameter is larger than 4.3 A
AJOVEB	Pore window diameter is larger than 4.3 A
AWAHEM	Pore window diameter is larger than 4.3 A
KAYCIY	Pore window diameter is larger than 4.3 A
LELMIA01	Pore window diameter is larger than 4.3 A
METYIU	Pore window diameter is larger than 4.3 A
IYOBAA	Pore window diameter is larger than 4.3 A
INOVEN	Pore window diameter is larger than 4.3 A
OTATOT	Pore window diameter is larger than 4.3 A
QEFNAQ	Pore window diameter is larger than 4.3 A
YIWMIA	Pore window diameter is larger than 4.3 A
NOCLOH03	Pore window diameter is larger than 4.3 A
EWUTEW	Pore window diameter is larger than 4.3 A
MATBAM	Pore window diameter is larger than 4.3 A
OTAVAH	Pore window diameter is larger than 4.3 A
AZIXUD	Pore window diameter is larger than 4.3 A
CAYDEN	Pore window diameter is larger than 4.3 A
MOXDOT01	Pore window diameter is larger than 4.3 A
OHAKEO	Pore window diameter is larger than 4.3 A
RABHIH	Pore window diameter is larger than 4.3 A
LUMDEC	Pore window diameter is larger than 4.3 A
LUSHOX01	Pore window diameter is larger than 4.3 A
AVELUJ	Pore window diameter is larger than 4.3 A
OCACUR	Pore window diameter is larger than 4.3 A
VIXCUB	Pore window diameter is larger than 4.3 A
AJAYIT	Pore window diameter is larger than 4.3 A
OTAVUB	Pore window diameter is larger than 4.3 A
XEGJUQ	Pore window diameter is larger than 4.3 A
LAFQOA	Pore window diameter is larger than 4.3 A
LAGCIH	Pore window diameter is larger than 4.3 A
EZOBUR	Pore window diameter is larger than 4.3 A
KOFPEB04	Pore window diameter is larger than 4.3 A
KAVGAQ	Pore window diameter is larger than 4.3 A
ZISYAD	Pore window diameter is larger than 4.3 A
EDAVOV	Pore window diameter is larger than 4.3 A
GIYSOX	Pore window diameter is larger than 4.3 A
FASHAK	Pore window diameter is larger than 4.3 A
SOJGOO	Pore window diameter is larger than 4.3 A
VEQBID	Pore window diameter is larger than 4.3 A
MIHLAR	Pore window diameter is larger than 4.3 A
LUSHOX	Pore window diameter is larger than 4.3 A
VOCXUH	Pore window diameter is larger than 4.3 A
CANRUG	Pore window diameter is larger than 4.3 A
CAWDOU02	Pore window diameter is larger than 4.3 A
RONZID	Pore window diameter is larger than 4.3 A
SEQSIS	Pore window diameter is larger than 4.3 A
MIFGEP01	Pore window diameter is larger than 4.3 A
XEKCAT01	Pore window diameter is larger than 4.3 A
LUSHOX02	Pore window diameter is larger than 4.3 A
SATCEX	Pore window diameter is larger than 4.3 A
GUSJOU	Pore window diameter is larger than 4.3 A
MIFGEP	Pore window diameter is larger than 4.3 A
NEZWOG01	Pore window diameter is larger than 4.3 A
LASYOU	Pore window diameter is larger than 4.3 A
XEGKAX	Pore window diameter is larger than 4.3 A
GIYSAJ	Pore window diameter is larger than 4.3 A
HEWFUL	Pore window diameter is larger than 4.3 A
AXUHAD	Pore window diameter is larger than 4.3 A
CAYDIR	Pore window diameter is larger than 4.3 A
KABXIW	Pore window diameter is larger than 4.3 A
YUKBIP01	Pore window diameter is larger than 4.3 A
YUBFOR	Pore window diameter is larger than 4.3 A
LAGNOY	Pore window diameter is larger than 4.3 A
CEDFIC	Pore window diameter is larger than 4.3 A
KABXOC	Pore window diameter is larger than 4.3 A
TIDMEA	Pore window diameter is larger than 4.3 A
RAXCOK	Pore window diameter is larger than 4.3 A
AFUKAP	Pore window diameter is larger than 4.3 A
OXALIJ	Pore window diameter is larger than 4.3 A
HANWAW	Pore window diameter is larger than 4.3 A
GIYSIR	Pore window diameter is larger than 4.3 A
ETEJOD01	Pore window diameter is larger than 4.3 A
JEJWIF	Pore window diameter is larger than 4.3 A
KABXES	Pore window diameter is larger than 4.3 A
CUMDOE	Pore window diameter is larger than 4.3 A
TEJLOL	Pore window diameter is larger than 4.3 A
QEWDON	Pore window diameter is larger than 4.3 A
OBEDEE	Pore window diameter is larger than 4.3 A
OTAVOV	Pore window diameter is larger than 4.3 A
GUKZAO	Pore window diameter is larger than 4.3 A
JAVNIE	Pore window diameter is larger than 4.3 A
WECJIZ	Pore window diameter is larger than 4.3 A
MUVJIX	Pore window diameter is larger than 4.3 A
LIGHAM	Pore window diameter is larger than 4.3 A
YEVQUM	Pore window diameter is larger than 4.3 A
AVEMAQ	Pore window diameter is larger than 4.3 A
FIJDIM10	Pore window diameter is larger than 4.3 A
ORAQUU	Pore window diameter is larger than 4.3 A
AVELOD	Pore window diameter is larger than 4.3 A
LUQGAG	Pore window diameter is larger than 4.3 A
UVUPOR	Pore window diameter is larger than 4.3 A
ECAHOH	Pore window diameter is larger than 4.3 A
WUTCAP	Pore window diameter is larger than 4.3 A
WUTBOC	Pore window diameter is larger than 4.3 A
SETSOB	Pore window diameter is larger than 4.3 A
MACHIJ	Pore window diameter is larger than 4.3 A
QURSEC	Pore window diameter is larger than 4.3 A
GEDQIR	Pore window diameter is larger than 4.3 A
LAFQUG	Pore window diameter is larger than 4.3 A
ANOMUM	Pore window diameter is larger than 4.3 A
ACOLUB	Pore window diameter is larger than 4.3 A
CAYSIE	Pore window diameter is larger than 4.3 A
FAMBUS	Pore window diameter is larger than 4.3 A
ICAGOK	Pore window diameter is larger than 4.3 A
PEYPAM	Pore window diameter is larger than 4.3 A
OFESAU	Pore window diameter is larger than 4.3 A
IBATAI	Pore window diameter is larger than 4.3 A
KUDLUR	Pore window diameter is larger than 4.3 A
LAFRAN	Pore window diameter is larger than 4.3 A
KUDMAY	Pore window diameter is larger than 4.3 A
LOWPUI	Pore window diameter is larger than 4.3 A
KOFPEB05	Pore window diameter is larger than 4.3 A
RIBTAZ	Pore window diameter is larger than 4.3 A
UXABUR	Pore window diameter is larger than 4.3 A
NOCKOG	Pore window diameter is larger than 4.3 A
XITYOP	Pore window diameter is larger than 4.3 A
HAMRIY	Pore window diameter is larger than 4.3 A
ALIXOJ	Pore window diameter is larger than 4.3 A
YEKXET	Pore window diameter is larger than 4.3 A
TIRRIW	Pore window diameter is larger than 4.3 A
SAKRED	Pore window diameter is larger than 4.3 A
IBARUA	Pore window diameter is larger than 4.3 A
LOJFOF	Pore window diameter is larger than 4.3 A
HAKCAZ	Pore window diameter is larger than 4.3 A
XUMVEH	Pore window diameter is larger than 4.3 A
RIBDAJ	Pore window diameter is larger than 4.3 A
FUTCAZ	Pore window diameter is larger than 4.3 A
FEDBEX	Pore window diameter is larger than 4.3 A
UXABOL	Pore window diameter is larger than 4.3 A
GIYSEN	Pore window diameter is larger than 4.3 A
VIDXOX	Pore window diameter is larger than 4.3 A
COJGEO	Pore window diameter is larger than 4.3 A
ODUNEH	Pore window diameter is larger than 4.3 A
RACZEC	Pore window diameter is larger than 4.3 A
WEFCAN	Pore window diameter is larger than 4.3 A
JEBCOJ	Pore window diameter is larger than 4.3 A
USUBUG	Pore window diameter is larger than 4.3 A
WUTBIW	Pore window diameter is larger than 4.3 A
PAPROO	Pore window diameter is larger than 4.3 A
ETEJIX	Pore window diameter is larger than 4.3 A
FAHGAY	Pore window diameter is larger than 4.3 A
TARVUD	Pore window diameter is larger than 4.3 A
CETFOX	Pore window diameter is larger than 4.3 A
CADPII	Pore window diameter is larger than 4.3 A
KIKFIV	Pore window diameter is larger than 4.3 A
CUVGIK	Pore window diameter is larger than 4.3 A
OSAVEK	Pore window diameter is larger than 4.3 A
BUKMUQ	Pore window diameter is larger than 4.3 A
OFORUX	Pore window diameter is larger than 4.3 A
COWPOU	Pore window diameter is larger than 4.3 A
BAXSIE	Pore window diameter is larger than 4.3 A
VEJYIT01	Pore window diameter is larger than 4.3 A
LUSHIR	Pore window diameter is larger than 4.3 A
PUQYAC	Pore window diameter is larger than 4.3 A
KOFPEB02	Pore window diameter is larger than 4.3 A
RACZIG	Pore window diameter is larger than 4.3 A
OFESEY	Pore window diameter is larger than 4.3 A
YEYVOO	Pore window diameter is larger than 4.3 A
IBASUB	Pore window diameter is larger than 4.3 A
PUQXUV	Pore window diameter is larger than 4.3 A
FIJDIM01	Pore window diameter is larger than 4.3 A
FIJDIM11	Pore window diameter is larger than 4.3 A
ASACON	Pore window diameter is larger than 4.3 A
AFITUF	Pore window diameter is larger than 4.3 A
QEBGAH	Pore window diameter is larger than 4.3 A
HAMREU	Pore window diameter is larger than 4.3 A
CAYSOK	Pore window diameter is larger than 4.3 A
IBASAH	Pore window diameter is larger than 4.3 A
IBATEM	Pore window diameter is larger than 4.3 A
MECWIB	Pore window diameter is larger than 4.3 A
GIYTIS	Pore window diameter is larger than 4.3 A
XINFUW	Pore window diameter is larger than 4.3 A
OFESIC	Pore window diameter is larger than 4.3 A
TUTJAU	Pore window diameter is larger than 4.3 A
CAZNEY	Pore window diameter is larger than 4.3 A
NOFHOG	Pore window diameter is larger than 4.3 A
RIBDEN	Pore window diameter is larger than 4.3 A
WUTBES	Pore window diameter is larger than 4.3 A
FIJDIM	Pore window diameter is larger than 4.3 A
FIJDIM02	Pore window diameter is larger than 4.3 A
YATTUK	Pore window diameter is larger than 4.3 A
EQERAU	Pore window diameter is larger than 4.3 A
NOCKUM	Pore window diameter is larger than 4.3 A
BOLPAU	Pore window diameter is larger than 4.3 A
EQERIC	Pore window diameter is larger than 4.3 A
XUMVAD	Pore window diameter is larger than 4.3 A
IBASOV	Pore window diameter is larger than 4.3 A
UFEXIN	Pore window diameter is larger than 4.3 A
TIRQOB	Pore window diameter is larger than 4.3 A
EGATOW	Pore window diameter is larger than 4.3 A
KOFPEB03	Pore window diameter is larger than 4.3 A
HOGTOM	Pore window diameter is larger than 4.3 A
KESGAS	Pore window diameter is larger than 4.3 A
FIJDIM03	Pore window diameter is larger than 4.3 A
TARWAK	Pore window diameter is larger than 4.3 A
FIJDIM12	Pore window diameter is larger than 4.3 A
XUMTUV	Pore window diameter is larger than 4.3 A
LAXJAX	Pore window diameter is larger than 4.3 A
POCPAZ	Pore window diameter is larger than 4.3 A
GUXPOF	Pore window diameter is larger than 4.3 A
UDANAQ	Pore window diameter is larger than 4.3 A
DEQVIF	Pore window diameter is larger than 4.3 A
KOFPEB01	Pore window diameter is larger than 4.3 A
MULQOA	Pore window diameter is larger than 4.3 A
MUJRIT	Pore window diameter is larger than 4.3 A
XECBUD	Pore window diameter is larger than 4.3 A
BIBXUH	Pore window diameter is larger than 4.3 A
DAXNOG	Pore window diameter is larger than 4.3 A
DAPBIH	Pore window diameter is larger than 4.3 A
AFEJOK	Pore window diameter is larger than 4.3 A
KOFPEB	Pore window diameter is larger than 4.3 A
GEZRAG	Pore window diameter is larger than 4.3 A
SAKRAZ	Pore window diameter is larger than 4.3 A
LAFRER	Pore window diameter is larger than 4.3 A
IBASEL	Pore window diameter is larger than 4.3 A
TAPXOZ	Pore window diameter is larger than 4.3 A
GULGEZ	Pore window diameter is larger than 4.3 A
FIJDIM04	Pore window diameter is larger than 4.3 A
IXUWII	Pore window diameter is larger than 4.3 A
UFEXEJ	Pore window diameter is larger than 4.3 A
RIHJUO	Pore window diameter is larger than 4.3 A
EKOPIE	Pore window diameter is larger than 4.3 A
RAZGOQ	Pore window diameter is larger than 4.3 A
DOCKOW	Pore window diameter is larger than 4.3 A
FEWQIJ	Pore window diameter is larger than 4.3 A
SEFBOV	Pore window diameter is larger than 4.3 A
WUTBUI	Pore window diameter is larger than 4.3 A
YIWPEZ	Pore window diameter is larger than 4.3 A
AROFET	Pore window diameter is larger than 4.3 A
RIDDUE	Pore window diameter is larger than 4.3 A
CEBDOD	Pore window diameter is larger than 4.3 A
FIJDIM05	Pore window diameter is larger than 4.3 A
ETEJUJ	Pore window diameter is larger than 4.3 A
LOQSIU	Pore window diameter is larger than 4.3 A
MATTUX	Pore window diameter is larger than 4.3 A
FAGFUQ	Pore window diameter is larger than 4.3 A
CIFJAE	Pore window diameter is larger than 4.3 A
HURGEH	Pore window diameter is larger than 4.3 A
RIGWIP	Pore window diameter is larger than 4.3 A
EQEREY	Pore window diameter is larger than 4.3 A
ECAHEX	Pore window diameter is larger than 4.3 A
OLUCAZ	Pore window diameter is larger than 4.3 A
GAYFUJ	Pore window diameter is larger than 4.3 A
FIJDIM06	Pore window diameter is larger than 4.3 A
NIBXUT	Pore window diameter is larger than 4.3 A
NEZWOG	Pore window diameter is larger than 4.3 A
ETEKEU	Pore window diameter is larger than 4.3 A
ETEKAQ	Pore window diameter is larger than 4.3 A
FIJDIM07	Pore window diameter is larger than 4.3 A
PICTIG	Pore window diameter is larger than 4.3 A
FEWQOP	Pore window diameter is larger than 4.3 A
EBIHII	Pore window diameter is larger than 4.3 A
MAFJIO	Pore window diameter is larger than 4.3 A
LAGDOO	Pore window diameter is larger than 4.3 A
MABKIK01	Pore window diameter is larger than 4.3 A
GUYMAP	Pore window diameter is larger than 4.3 A
BUVXOG	Pore window diameter is larger than 4.3 A
FAYQON	Pore window diameter is larger than 4.3 A
OHOLIH	Pore window diameter is larger than 4.3 A
BELJIL	Pore window diameter is larger than 4.3 A
PURJES	Pore window diameter is larger than 4.3 A
KIVFEB	Pore window diameter is larger than 4.3 A
FIJDIM08	Pore window diameter is larger than 4.3 A
BAKJII	Pore window diameter is larger than 4.3 A
OGAGEJ	Pore window diameter is larger than 4.3 A
SEQTEP	Pore window diameter is larger than 4.3 A
CAYYEG	Pore window diameter is larger than 4.3 A
PEPLOM	Pore window diameter is larger than 4.3 A
FIJDIM09	Pore window diameter is larger than 4.3 A
KAYBUJ	Pore window diameter is larger than 4.3 A
ZELQAK	Pore window diameter is larger than 4.3 A
FAYPAY	Pore window diameter is larger than 4.3 A
IYICUP	Pore window diameter is larger than 4.3 A
ELOZEK	Pore window diameter is larger than 4.3 A
BOJCIN	Pore window diameter is larger than 4.3 A
AVIPAX	Pore window diameter is larger than 4.3 A
OVICUS	Pore window diameter is larger than 4.3 A
ENITEB	Pore window diameter is larger than 4.3 A
FULQUZ	Pore window diameter is larger than 4.3 A
EREGOY	Pore window diameter is larger than 4.3 A
SODZIV	Pore window diameter is larger than 4.3 A
HIZQUD	Pore window diameter is larger than 4.3 A
PEKDAM	Pore window diameter is larger than 4.3 A
WEBKOD	Pore window diameter is larger than 4.3 A
PUSDIR	Pore window diameter is larger than 4.3 A
ALULID	Pore window diameter is larger than 4.3 A
JIVFUQ	Pore window diameter is larger than 4.3 A
NEDVUP	Pore window diameter is larger than 4.3 A
REYPIW	Pore window diameter is larger than 4.3 A
KUXLUL	Pore window diameter is larger than 4.3 A
UKUPUL	Pore window diameter is larger than 4.3 A
SONTAR	Pore window diameter is larger than 4.3 A
YOZBOF	Pore window diameter is larger than 4.3 A
VEJYIT	Pore window diameter is larger than 4.3 A
BONMEX	Pore window diameter is larger than 4.3 A
ADODUU	Pore window diameter is larger than 4.3 A
CAGSAG	Pore window diameter is larger than 4.3 A
FEZREJ	Pore window diameter is larger than 4.3 A
CAVREY	Pore window diameter is larger than 4.3 A
REDYEG	Pore window diameter is larger than 4.3 A
BARZUR	Pore window diameter is larger than 4.3 A
ADODII	Pore window diameter is larger than 4.3 A
LAFRIV	Pore window diameter is larger than 4.3 A
AGAXOV	Pore window diameter is larger than 4.3 A
HOWQAM	Pore window diameter is larger than 4.3 A
LELRUR	Pore window diameter is larger than 4.3 A
ADODOO	Pore window diameter is larger than 4.3 A
XEDGIY	Pore window diameter is larger than 4.3 A
HAFQUC	Pore window diameter is larger than 4.3 A
REXDEF	Pore window diameter is larger than 4.3 A
MOTMAK	Pore window diameter is larger than 4.3 A
FILYEG	Pore window diameter is larger than 4.3 A
SERKOQ	Pore window diameter is larger than 4.3 A
XOPLOE	Pore window diameter is larger than 4.3 A
EWESIJ	Pore window diameter is larger than 4.3 A
SUSZIQ	Pore window diameter is larger than 4.3 A
GOBGAG	Pore window diameter is larger than 4.3 A
DAWWEF	Pore window diameter is larger than 4.3 A
SATCAT	Pore window diameter is larger than 4.3 A
EPEWAY	Pore window diameter is larger than 4.3 A
UNAZIT	Pore window diameter is larger than 4.3 A
FARHIR	Pore window diameter is larger than 4.3 A
EPEWEC	Pore window diameter is larger than 4.3 A
OPOBIF	Pore window diameter is larger than 4.3 A
ZESZEE	Pore window diameter is larger than 4.3 A
FAYQIH	Pore window diameter is larger than 4.3 A
WEFXIQ	Pore window diameter is larger than 4.3 A
DOLXOR01	Pore window diameter is larger than 4.3 A
MANLOD	Pore window diameter is larger than 4.3 A
TEBYIK	Pore window diameter is larger than 4.3 A
XADDUD	Pore window diameter is larger than 4.3 A
MIVWEU	Pore window diameter is larger than 4.3 A
DOLXOR	Pore window diameter is larger than 4.3 A
EPEWAY01	Pore window diameter is larger than 4.3 A
FECZAQ	Pore window diameter is larger than 4.3 A
KINFEU	Pore window diameter is larger than 4.3 A
TAPXIT01	Pore window diameter is larger than 4.3 A
UFENAW	Pore window diameter is larger than 4.3 A
AFITIT	Pore window diameter is larger than 4.3 A
COZMUA	Pore window diameter is larger than 4.3 A
DOLXOR02	Pore window diameter is larger than 4.3 A
OJONOQ	Pore window diameter is larger than 4.3 A
FAYQAZ	Pore window diameter is larger than 4.3 A
PUDSIR	Pore window diameter is larger than 4.3 A
SATBEW	Pore window diameter is larger than 4.3 A
UBUROY	Pore window diameter is larger than 4.3 A
WARJAC	Pore window diameter is larger than 4.3 A
AXOCEW	Pore window diameter is larger than 4.3 A
JIYXUL	Pore window diameter is larger than 4.3 A
GALCED	Pore window diameter is larger than 4.3 A
FAFMAC	Pore window diameter is larger than 4.3 A
KACZIZ	Pore window diameter is larger than 4.3 A
FUTKEL	Pore window diameter is larger than 4.3 A
FECYUJ	Pore window diameter is larger than 4.3 A
NINHOH	Pore window diameter is larger than 4.3 A
ADARAA	Pore window diameter is larger than 4.3 A
GIXGOK	Pore window diameter is larger than 4.3 A
KAHNOX	Pore window diameter is larger than 4.3 A
TONQOD	Pore window diameter is larger than 4.3 A
ETAYAA	Pore window diameter is larger than 4.3 A
XUVHEB	Pore window diameter is larger than 4.3 A
BAKJEE	Pore window diameter is larger than 4.3 A
TAPXIT	Pore window diameter is larger than 4.3 A
SUSZOW	Pore window diameter is larger than 4.3 A
TARWEO	Pore window diameter is larger than 4.3 A
DEKHUX	Pore window diameter is larger than 4.3 A
LUSJIT	Pore window diameter is larger than 4.3 A
WUWQEL	Pore window diameter is larger than 4.3 A
QUQFIS	Pore window diameter is larger than 4.3 A
PEKCUF	Pore window diameter is larger than 4.3 A
OGIKAR	Pore window diameter is larger than 4.3 A
WIFBAQ	Pore window diameter is larger than 4.3 A
GITVIP	Pore window diameter is larger than 4.3 A
NERVAJ	Pore window diameter is larger than 4.3 A
PEFRID01	Pore window diameter is larger than 4.3 A
PEQWAK	Pore window diameter is larger than 4.3 A
CAVSUP	Pore window diameter is larger than 4.3 A
LUSJOZ	Pore window diameter is larger than 4.3 A
REGQUR	Pore window diameter is larger than 4.3 A
FEXCES	Pore window diameter is larger than 4.3 A
HOWPUF	Pore window diameter is larger than 4.3 A
RAHBUZ	Pore window diameter is larger than 4.3 A
KAYBIX	Pore window diameter is larger than 4.3 A
WOHBOL	Pore window diameter is larger than 4.3 A
PAMTII	Pore window diameter is larger than 4.3 A
LUSJEP	Pore window diameter is larger than 4.3 A
NEDWEA	Pore window diameter is larger than 4.3 A
HABREJ	Pore window diameter is larger than 4.3 A
WIJDAV	Pore window diameter is larger than 4.3 A
WOCWAN	Pore window diameter is larger than 4.3 A
OXITOF	Pore window diameter is larger than 4.3 A
KIPJIE	Pore window diameter is larger than 4.3 A
CAYKEU	Pore window diameter is larger than 4.3 A
BUWGAC	Pore window diameter is larger than 4.3 A
WAFKAQ	Pore window diameter is larger than 4.3 A
GAYFOD	Pore window diameter is larger than 4.3 A
AXUBAW	Pore window diameter is larger than 4.3 A
PETVEQ	Pore window diameter is larger than 4.3 A
BIWYAH10	Pore window diameter is larger than 4.3 A
COWMIL	Pore window diameter is larger than 4.3 A
HIHGEM	Pore window diameter is larger than 4.3 A
YIWLEV	Pore window diameter is larger than 4.3 A
COWMUX	Pore window diameter is larger than 4.3 A
UJIZET	Pore window diameter is larger than 4.3 A
COWMEH	Pore window diameter is larger than 4.3 A
ACOLOV	Pore window diameter is larger than 4.3 A
SEQSOY	Pore window diameter is larger than 4.3 A
KIPJOK	Pore window diameter is larger than 4.3 A
COMDOY	Pore window diameter is larger than 4.3 A
DAWCIP	Pore window diameter is larger than 4.3 A
KACZEV	Pore window diameter is larger than 4.3 A
CAXZOS	Pore window diameter is larger than 4.3 A
REGRAY	Pore window diameter is larger than 4.3 A
QUBZIX	Pore window diameter is larger than 4.3 A
WAMRIN02	Pore window diameter is larger than 4.3 A
BUVYEX	Pore window diameter is larger than 4.3 A
ZIDNEH	Pore window diameter is larger than 4.3 A
DONNEA	Pore window diameter is larger than 4.3 A
PANYEK	Pore window diameter is larger than 4.3 A
COWMOR	Pore window diameter is larger than 4.3 A
HOXGEH	Pore window diameter is larger than 4.3 A
NEVVIU	Pore window diameter is larger than 4.3 A
MIJMAU	Pore window diameter is larger than 4.3 A
REXCUU	Pore window diameter is larger than 4.3 A
YICREI	Pore window diameter is larger than 4.3 A
COWMAD	Pore window diameter is larger than 4.3 A
ZIKJIO	Pore window diameter is larger than 4.3 A
AQUCOF	Pore window diameter is larger than 4.3 A
OSAVUA	Pore window diameter is larger than 4.3 A
PEDMOB	Pore window diameter is larger than 4.3 A
XOVVOU	Pore window diameter is larger than 4.3 A
KINFAQ	Pore window diameter is larger than 4.3 A
RELLAW	Pore window diameter is larger than 4.3 A
HOGLEV01	Pore window diameter is larger than 4.3 A
JUTCUW	Pore window diameter is larger than 4.3 A
PEFRUP01	Pore window diameter is larger than 4.3 A
VUQKOI	Pore window diameter is larger than 4.3 A
MEFZUU	Pore window diameter is larger than 4.3 A
FEQSIF	Pore window diameter is larger than 4.3 A
MOXDIN01	Pore window diameter is larger than 4.3 A
EMITUQ	Pore window diameter is larger than 4.3 A
PAMTOO	Pore window diameter is larger than 4.3 A
REXDAB	Pore window diameter is larger than 4.3 A
AQUDAS	Pore window diameter is larger than 4.3 A
PAMTUU	Pore window diameter is larger than 4.3 A
QOWLEU	Pore window diameter is larger than 4.3 A
AXUHEH	Pore window diameter is larger than 4.3 A
PUSDOX	Pore window diameter is larger than 4.3 A
EFEGOM	Pore window diameter is larger than 4.3 A
MIFVEE	Pore window diameter is larger than 4.3 A
GUYLOC	Pore window diameter is larger than 4.3 A
WEHJOK	Pore window diameter is larger than 4.3 A
CUNFOH	Pore window diameter is larger than 4.3 A
NESTAI	Pore window diameter is larger than 4.3 A
LUFNAC	Pore window diameter is larger than 4.3 A
XEGJOK	Pore window diameter is larger than 4.3 A
MICCUY	Pore window diameter is larger than 4.3 A
XANMIJ	Pore window diameter is larger than 4.3 A
AMAFOK	Pore window diameter is larger than 4.3 A
PEJRIH	Pore window diameter is larger than 4.3 A
PIYZAZ	Pore window diameter is larger than 4.3 A
SOKKOT	Pore window diameter is larger than 4.3 A
HIHGAI	Pore window diameter is larger than 4.3 A
EXOZIB	Pore window diameter is larger than 4.3 A
HAMJOW	Pore window diameter is larger than 4.3 A
MIFNUM	Pore window diameter is larger than 4.3 A
MIFSUR	Pore window diameter is larger than 4.3 A
FECXUI	Pore window diameter is larger than 4.3 A
REXDUV	Pore window diameter is larger than 4.3 A
MIFTUS	Pore window diameter is larger than 4.3 A
BAWRUO	Pore window diameter is larger than 4.3 A
XEGKEB	Pore window diameter is larger than 4.3 A
HAWYUB	Pore window diameter is larger than 4.3 A
KEFBII	Pore window diameter is larger than 4.3 A
COGWEB	Pore window diameter is larger than 4.3 A
BIJDUV	Pore window diameter is larger than 4.3 A
EXEWAG	Pore window diameter is larger than 4.3 A
ZAZBUZ	Pore window diameter is larger than 4.3 A
YEYCUC	Pore window diameter is larger than 4.3 A
GIMSIG	Pore window diameter is larger than 4.3 A
ATAFIK	Pore window diameter is larger than 4.3 A
REXCII	Pore window diameter is larger than 4.3 A
YONNAR	Pore window diameter is larger than 4.3 A
TEFWIL	Pore window diameter is larger than 4.3 A
MIFTIG	Pore window diameter is larger than 4.3 A
AFOYOK	Pore window diameter is larger than 4.3 A
KECRAL10	Pore window diameter is larger than 4.3 A
EMITUQ01	Pore window diameter is larger than 4.3 A
UXUPIN	Pore window diameter is larger than 4.3 A
OLEKUM	Pore window diameter is larger than 4.3 A
VEHPUU	Pore window diameter is larger than 4.3 A
BAKJOO	Pore window diameter is larger than 4.3 A
LAFROB	Pore window diameter is larger than 4.3 A
FAHFUR	Pore window diameter is larger than 4.3 A
BOLPEY	Pore window diameter is larger than 4.3 A
WAMRIN	Pore window diameter is larger than 4.3 A
DIDBAV	Pore window diameter is larger than 4.3 A
RAPYUE	Pore window diameter is larger than 4.3 A
NEJYUY	Pore window diameter is larger than 4.3 A
MIFROK	Pore window diameter is larger than 4.3 A
RAPYOY	Pore window diameter is larger than 4.3 A
IFENOY03	Pore window diameter is larger than 4.3 A
NEGZUW	Pore window diameter is larger than 4.3 A
ALIXUP	Pore window diameter is larger than 4.3 A
IFENOY02	Pore window diameter is larger than 4.3 A
NERVEN	Pore window diameter is larger than 4.3 A
MEGBAD	Pore window diameter is larger than 4.3 A
CIFMEL	Pore window diameter is larger than 4.3 A
CUNFOH01	Pore window diameter is larger than 4.3 A
YUXQOY	Pore window diameter is larger than 4.3 A
MIFTEC	Pore window diameter is larger than 4.3 A
HAXMUP	Pore window diameter is larger than 4.3 A
WEHJEA	Pore window diameter is larger than 4.3 A
NOCLUN	Pore window diameter is larger than 4.3 A
PUDSOX	Pore window diameter is larger than 4.3 A
LAGWEX	Pore window diameter is larger than 4.3 A
WENKOR	Pore window diameter is larger than 4.3 A
MIFSAX	Pore window diameter is larger than 4.3 A
LIQCUK	Pore window diameter is larger than 4.3 A
IFENOY01	Pore window diameter is larger than 4.3 A
REXFIL	Pore window diameter is larger than 4.3 A
WENKUX	Pore window diameter is larger than 4.3 A
UXUPEJ	Pore window diameter is larger than 4.3 A
VIRVEY	Pore window diameter is larger than 4.3 A
WENKEH	Pore window diameter is larger than 4.3 A
ENITOL	Pore window diameter is larger than 4.3 A
REFTON	Pore window diameter is larger than 4.3 A
IFENOY	Pore window diameter is larger than 4.3 A
WENLAE	Pore window diameter is larger than 4.3 A
PURJAO	Pore window diameter is larger than 4.3 A
UXUNUX	Pore window diameter is larger than 4.3 A
YAXBOP	Pore window diameter is larger than 4.3 A
LUFNAC05	Pore window diameter is larger than 4.3 A
ALANAD	Pore window diameter is larger than 4.3 A
QOHTUD	Pore window diameter is larger than 4.3 A
QUQFOY	Pore window diameter is larger than 4.3 A
UFUQIV	Pore window diameter is larger than 4.3 A
SUPLOF	Pore window diameter is larger than 4.3 A
REFTUT	Pore window diameter is larger than 4.3 A
XUGSEY	Pore window diameter is larger than 4.3 A
TEQTEQ	Pore window diameter is larger than 4.3 A
BUWGEG	Pore window diameter is larger than 4.3 A
KEVVIS	Pore window diameter is larger than 4.3 A
GOGSIF	Pore window diameter is larger than 4.3 A
BEXPAX	Pore window diameter is larger than 4.3 A
FIJCUX	Pore window diameter is larger than 4.3 A
GEFZAU	Pore window diameter is larger than 4.3 A
WENKIL	Pore window diameter is larger than 4.3 A
DEZNED	Pore window diameter is larger than 4.3 A
YURKIG	Pore window diameter is larger than 4.3 A
LUFNAC03	Pore window diameter is larger than 4.3 A
CUHPUR	Pore window diameter is larger than 4.3 A
TADYEE	Pore window diameter is larger than 4.3 A
PAPYOW	Pore window diameter is larger than 4.3 A
PUDSIR01	Pore window diameter is larger than 4.3 A
REXCOO	Pore window diameter is larger than 4.3 A
SADMOB	Pore window diameter is larger than 4.3 A
VEXTUO	Pore window diameter is larger than 4.3 A
CEJBEA	Pore window diameter is larger than 4.3 A
LUFNAC02	Pore window diameter is larger than 4.3 A
XEGKUR	Pore window diameter is larger than 4.3 A
UZIJUJ	Pore window diameter is larger than 4.3 A
HUYJUG	Pore window diameter is larger than 4.3 A
XACYAB	Pore window diameter is larger than 4.3 A
VEXVAW	Pore window diameter is larger than 4.3 A
REFJET	Pore window diameter is larger than 4.3 A
CITZIP	Pore window diameter is larger than 4.3 A
EYACOX	Pore window diameter is larger than 4.3 A
LUFNAC01	Pore window diameter is larger than 4.3 A
LUFNAC04	Pore window diameter is larger than 4.3 A
IJASOC	Pore window diameter is larger than 4.3 A
MIFPUO	Pore window diameter is larger than 4.3 A
XINRAP	Pore window diameter is larger than 4.3 A
ZILBIH	Pore window diameter is larger than 4.3 A
GAXKUN	Pore window diameter is larger than 4.3 A
WOLREV	Pore window diameter is larger than 4.3 A
CEHLAD	Pore window diameter is larger than 4.3 A
CEHKUW	Pore window diameter is larger than 4.3 A
MOFKUO	Pore window diameter is larger than 4.3 A
LELROL	Pore window diameter is larger than 4.3 A
LAGDII	Pore window diameter is larger than 4.3 A
LETRIN	Pore window diameter is larger than 4.3 A
IPIFAP	Pore window diameter is larger than 4.3 A
HASMIZ	Pore window diameter is larger than 4.3 A
IGAHAB	Pore window diameter is larger than 4.3 A
MATVAF	Pore window diameter is larger than 4.3 A
LOBHAM	Pore window diameter is larger than 4.3 A
REWLEM	Pore window diameter is larger than 4.3 A
YEKXOD	Pore window diameter is larger than 4.3 A
FIHRIZ	Pore window diameter is larger than 4.3 A
NEVVAM	Pore window diameter is larger than 4.3 A
IFAGON	Pore window diameter is larger than 4.3 A
DELGEI	Pore window diameter is larger than 4.3 A
HOGJIX	Pore window diameter is larger than 4.3 A
TUTHOG	Pore window diameter is larger than 4.3 A
FAYKOH	Pore window diameter is larger than 4.3 A
DIDBEZ	Pore window diameter is larger than 4.3 A
QEBKUF	Pore window diameter is larger than 4.3 A
XEGKOL	Pore window diameter is larger than 4.3 A
IXAKAU	Pore window diameter is larger than 4.3 A
OGAXUR	Pore window diameter is larger than 4.3 A
VATXEU	Pore window diameter is larger than 4.3 A
VURYOX	Pore window diameter is larger than 4.3 A
REXFEH	Pore window diameter is larger than 4.3 A
OGECOU	Pore window diameter is larger than 4.3 A
BEPROF	Pore window diameter is larger than 4.3 A
OWAVIS	Pore window diameter is larger than 4.3 A
VODQIP	Pore window diameter is larger than 4.3 A
KINDOC	Pore window diameter is larger than 4.3 A
SABVOH	Pore window diameter is larger than 4.3 A
ALAMUW	Pore window diameter is larger than 4.3 A
HOWPOZ	Pore window diameter is larger than 4.3 A
IMUTUG	Pore window diameter is larger than 4.3 A
FAZPED	Pore window diameter is larger than 4.3 A
YILJAG	Pore window diameter is larger than 4.3 A
NEDWAW	Pore window diameter is larger than 4.3 A
RAZYOI	Pore window diameter is larger than 4.3 A
MIZJUB	Pore window diameter is larger than 4.3 A
FARFUA	Pore window diameter is larger than 4.3 A
HAWWIN	Pore window diameter is larger than 4.3 A
ICALOP	Pore window diameter is larger than 4.3 A
FAYPIG	Pore window diameter is larger than 4.3 A
XIGHAX	Pore window diameter is larger than 4.3 A
PUDSUD	Pore window diameter is larger than 4.3 A
ZIMTAS	Pore window diameter is larger than 4.3 A
OPOZEZ	Pore window diameter is larger than 4.3 A
CECVAI	Pore window diameter is larger than 4.3 A
XENKIM	Pore window diameter is larger than 4.3 A
BEPRIZ	Pore window diameter is larger than 4.3 A
JETZAK	Pore window diameter is larger than 4.3 A
FARFOU	Pore window diameter is larger than 4.3 A
EDOMAM	Pore window diameter is larger than 4.3 A
LUCDES	Pore window diameter is larger than 4.3 A
LUCDAO	Pore window diameter is larger than 4.3 A
GUXRAT	Pore window diameter is larger than 4.3 A
TACPAP	Pore window diameter is larger than 4.3 A
NABMUA01	Pore window diameter is larger than 4.3 A
KATDAM	Pore window diameter is larger than 4.3 A
NABMUA	Pore window diameter is larger than 4.3 A
AMAGAX	Pore window diameter is larger than 4.3 A
KUJNOT	Pore window diameter is larger than 4.3 A
UJAQUS	Pore window diameter is larger than 4.3 A
VEMMAC	Pore window diameter is larger than 4.3 A
IXOFOR	Pore window diameter is larger than 4.3 A
ACAJOF	Pore window diameter is larger than 4.3 A
UCOXOZ	Pore window diameter is larger than 4.3 A
FIJCUX01	Pore window diameter is larger than 4.3 A
LAGBUS	Pore window diameter is larger than 4.3 A
WIYFAM	Pore window diameter is larger than 4.3 A
ECUDOX	Pore window diameter is larger than 4.3 A
BEXVEH	Pore window diameter is larger than 4.3 A
PURJIW	Pore window diameter is larger than 4.3 A
SARNOQ	Pore window diameter is larger than 4.3 A
LUCDIW	Pore window diameter is larger than 4.3 A
TOHSAL	Pore window diameter is larger than 4.3 A
CAYQUQ	Pore window diameter is larger than 4.3 A
REXFUX	Pore window diameter is larger than 4.3 A
TERFIH	Pore window diameter is larger than 4.3 A
PUJQEQ	Pore window diameter is larger than 4.3 A
SABVOH01	Pore window diameter is larger than 4.3 A
RAZYIC	Pore window diameter is larger than 4.3 A
HAWWUZ	Pore window diameter is larger than 4.3 A
ICARAH	Pore window diameter is larger than 4.3 A
WIBSAD	Pore window diameter is larger than 4.3 A
REXFOR	Pore window diameter is larger than 4.3 A
VEJHEZ	Pore window diameter is larger than 4.3 A
VEMMEG	Pore window diameter is larger than 4.3 A
VEWLAM	Pore window diameter is larger than 4.3 A
PENNON	Pore window diameter is larger than 4.3 A
PARNON	Pore window diameter is larger than 4.3 A
REXDOP	Pore window diameter is larger than 4.3 A
VICLAW	Pore window diameter is larger than 4.3 A
OGOWAJ	Pore window diameter is larger than 4.3 A
AGARUW	Pore window diameter is larger than 4.3 A
HEDCIE	Pore window diameter is larger than 4.3 A
YAPMAF	Pore window diameter is larger than 4.3 A
XIDBUJ	Pore window diameter is larger than 4.3 A
MAVNUU	Pore window diameter is larger than 4.3 A
JUCXEK	Pore window diameter is larger than 4.3 A
BIJFAD	Pore window diameter is larger than 4.3 A
UTULUR	Pore window diameter is larger than 4.3 A
GEFYUN	Pore window diameter is larger than 4.3 A
ISOHEE	Pore window diameter is larger than 4.3 A
KIVFAX	Pore window diameter is larger than 4.3 A
KIVDUP	Pore window diameter is larger than 4.3 A
GULWIU	Pore window diameter is larger than 4.3 A
ESEVIH	Pore window diameter is larger than 4.3 A
HEFDON	Pore window diameter is larger than 4.3 A
BAKGIF	Pore window diameter is larger than 4.3 A
NUGROX	Pore window diameter is larger than 4.3 A
FUNBIA	Pore window diameter is larger than 4.3 A
WEHJIE	Pore window diameter is larger than 4.3 A
OHOFEW	Pore window diameter is larger than 4.3 A
TOHYUL	Pore window diameter is larger than 4.3 A
LUPYAX	Pore window diameter is larger than 4.3 A
FEFCUQ	Pore window diameter is larger than 4.3 A
LAZXOB	Pore window diameter is larger than 4.3 A
PARHAS	Pore window diameter is larger than 4.3 A
FEFDAX	Pore window diameter is larger than 4.3 A
KAWBOB	Pore window diameter is larger than 4.3 A
HAWWOT	Pore window diameter is larger than 4.3 A
WEBKIZ	Pore window diameter is larger than 4.3 A
PEPLIG	Pore window diameter is larger than 4.3 A
JOHFIW	Pore window diameter is larger than 4.3 A
MIFQOJ	Pore window diameter is larger than 4.3 A
TATPOV	Pore window diameter is larger than 4.3 A
NUGRIR	Pore window diameter is larger than 4.3 A
XIGHIF	Pore window diameter is larger than 4.3 A
XAMDUM04	Pore window diameter is larger than 4.3 A
FERHAN	Pore window diameter is larger than 4.3 A
NINVAI	Pore window diameter is larger than 4.3 A
UBUMAH	Pore window diameter is larger than 4.3 A
IXOFUX01	Pore window diameter is larger than 4.3 A
HOZTOG	Pore window diameter is larger than 4.3 A
IKETOH	Pore window diameter is larger than 4.3 A
ICEGED	Pore window diameter is larger than 4.3 A
MARXEK	Pore window diameter is larger than 4.3 A
CAVRAU	Pore window diameter is larger than 4.3 A
FURRUG	Pore window diameter is larger than 4.3 A
MUNPAN	Pore window diameter is larger than 4.3 A
WOJJOV	Pore window diameter is larger than 4.3 A
NEDWIE	Pore window diameter is larger than 4.3 A
CIFMIP	Pore window diameter is larger than 4.3 A
LAVTUZ	Pore window diameter is larger than 4.3 A
ZARPUF	Pore window diameter is larger than 4.3 A
KAVJEX01	Pore window diameter is larger than 4.3 A
VEYREY	Pore window diameter is larger than 4.3 A
WEBKOF	Pore window diameter is larger than 4.3 A
SADLIU	Pore window diameter is larger than 4.3 A
REGREC	Pore window diameter is larger than 4.3 A
CUNWEO	Pore window diameter is larger than 4.3 A
LAVTIN	Pore window diameter is larger than 4.3 A
IXODUV	Pore window diameter is larger than 4.3 A
QATHOK	Pore window diameter is larger than 4.3 A
EPISOM	Pore window diameter is larger than 4.3 A
JISVAJ	Pore window diameter is larger than 4.3 A
SENWIT	Pore window diameter is larger than 4.3 A
KEQDER	Pore window diameter is larger than 4.3 A
LAVTOT	Pore window diameter is larger than 4.3 A
KUJNUZ	Pore window diameter is larger than 4.3 A
YEMJAC	Pore window diameter is larger than 4.3 A
LAVSUY	Pore window diameter is larger than 4.3 A
WAMRIN01	Pore window diameter is larger than 4.3 A
WOLRIZ	Pore window diameter is larger than 4.3 A
NAYZOE	Pore window diameter is larger than 4.3 A
EDAPIK	Pore window diameter is larger than 4.3 A
UVEVUN	Pore window diameter is larger than 4.3 A
UZUNAF01	Pore window diameter is larger than 4.3 A
IYOHOU	Pore window diameter is larger than 4.3 A
YAWKOX	Pore window diameter is larger than 4.3 A
LAVTEJ01	Pore window diameter is larger than 4.3 A
HIHGUC	Pore window diameter is larger than 4.3 A
AFOVAT	Pore window diameter is larger than 4.3 A
OXALUV	Pore window diameter is larger than 4.3 A
MINVUA01	Pore window diameter is larger than 4.3 A
MINVUA	Pore window diameter is larger than 4.3 A
SONTUL	Pore window diameter is larger than 4.3 A
FARFIO	Pore window diameter is larger than 4.3 A
ADUWIH	Pore window diameter is larger than 4.3 A
SONVAT	Pore window diameter is larger than 4.3 A
UCOCUM	Pore window diameter is larger than 4.3 A
LAGCUT	Pore window diameter is larger than 4.3 A
TASWOB	Pore window diameter is larger than 4.3 A
FIJFEK	Pore window diameter is larger than 4.3 A
HIFVOI	Pore window diameter is larger than 4.3 A
WAHMUP	Pore window diameter is larger than 4.3 A
LAVTEJ	Pore window diameter is larger than 4.3 A
GEGDED	Pore window diameter is larger than 4.3 A
RAHNOF	Pore window diameter is larger than 4.3 A
VUJBEI	Pore window diameter is larger than 4.3 A
SOYWOT	Pore window diameter is larger than 4.3 A
UZUNAF	Pore window diameter is larger than 4.3 A
EBEWOZ	Pore window diameter is larger than 4.3 A
TERFUT	Pore window diameter is larger than 4.3 A
FECXES	Pore window diameter is larger than 4.3 A
UZUNEJ	Pore window diameter is larger than 4.3 A
MUDTEL	Pore window diameter is larger than 4.3 A
LURGEL	Pore window diameter is larger than 4.3 A
LAVTAF	Pore window diameter is larger than 4.3 A
SUJNUH	Pore window diameter is larger than 4.3 A
LAGCED	Pore window diameter is larger than 4.3 A
ADASIJ	Pore window diameter is larger than 4.3 A
PEYVEV	Pore window diameter is larger than 4.3 A
LEDLEN	Pore window diameter is larger than 4.3 A
LAGWUN	Pore window diameter is larger than 4.3 A
EBEWOZ01	Pore window diameter is larger than 4.3 A
EPOTAF	Pore window diameter is larger than 4.3 A
IXOFUX	Pore window diameter is larger than 4.3 A
DAKVUI	Pore window diameter is larger than 4.3 A
MOCKEV	Pore window diameter is larger than 4.3 A
WAYKAK	Pore window diameter is larger than 4.3 A
XAMDUM05	Pore window diameter is larger than 4.3 A
SONVEX	Pore window diameter is larger than 4.3 A
VUJBIM	Pore window diameter is larger than 4.3 A
HEDCAW	Pore window diameter is larger than 4.3 A
LUNBIF	Pore window diameter is larger than 4.3 A
REGRIG	Pore window diameter is larger than 4.3 A
LENGAO	Pore window diameter is larger than 4.3 A
XALXUF	Pore window diameter is larger than 4.3 A
MUDTAH	Pore window diameter is larger than 4.3 A
GETXEK	Pore window diameter is larger than 4.3 A
SONVIB	Pore window diameter is larger than 4.3 A
EBEWIT	Pore window diameter is larger than 4.3 A
GERWEH	Pore window diameter is larger than 4.3 A
XICZAM	Pore window diameter is larger than 4.3 A
XAMDUM06	Pore window diameter is larger than 4.3 A
HUYKAN	Pore window diameter is larger than 4.3 A
XADDIR	Pore window diameter is larger than 4.3 A
IVEHEW	Pore window diameter is larger than 4.3 A
XEXLIX	Pore window diameter is larger than 4.3 A
FIQCEN	Pore window diameter is larger than 4.3 A
XADDEN	Pore window diameter is larger than 4.3 A
MATVEJ	Pore window diameter is larger than 4.3 A
KUJPAH	Pore window diameter is larger than 4.3 A
DAKVOC	Pore window diameter is larger than 4.3 A
IXOFEH	Pore window diameter is larger than 4.3 A
PARHEW	Pore window diameter is larger than 4.3 A
IXOFIL	Pore window diameter is larger than 4.3 A
SADLOA	Pore window diameter is larger than 4.3 A
NERSUA	Pore window diameter is larger than 4.3 A
BICDAU	Pore window diameter is larger than 4.3 A
XAMDUM03	Pore window diameter is larger than 4.3 A
WEHHUO	Pore window diameter is larger than 4.3 A
REXFAD	Pore window diameter is larger than 4.3 A
CAXSUR	Pore window diameter is larger than 4.3 A
XALXUF01	Pore window diameter is larger than 4.3 A
WAYMEQ	Pore window diameter is larger than 4.3 A
AMODUC	Pore window diameter is larger than 4.3 A
WEHHEY	Pore window diameter is larger than 4.3 A
OFODAP	Pore window diameter is larger than 4.3 A
EBEXEQ	Pore window diameter is larger than 4.3 A
PUPHUE	Pore window diameter is larger than 4.3 A
SICZIP	Pore window diameter is larger than 4.3 A
FAJYAS	Pore window diameter is larger than 4.3 A
OFEREX	Pore window diameter is larger than 4.3 A
SIZPUN	Pore window diameter is larger than 4.3 A
XICNOO	Pore window diameter is larger than 4.3 A
LAGVOG	Pore window diameter is larger than 4.3 A
ADASOP	Pore window diameter is larger than 4.3 A
XAMDUM02	Pore window diameter is larger than 4.3 A
SEHXIN	Pore window diameter is larger than 4.3 A
XICNOO02	Pore window diameter is larger than 4.3 A
XAMDUM01	Pore window diameter is larger than 4.3 A
AMOFAK	Pore window diameter is larger than 4.3 A
WEHHOI	Pore window diameter is larger than 4.3 A
XAMDUM	Pore window diameter is larger than 4.3 A
TETZEZ	Pore window diameter is larger than 4.3 A
MOCKAR	Pore window diameter is larger than 4.3 A
ADASUV	Pore window diameter is larger than 4.3 A
EBEXEQ01	Pore window diameter is larger than 4.3 A
XAMDUM07	Pore window diameter is larger than 4.3 A
TEXTOH	Pore window diameter is larger than 4.3 A
AFOVIB	Pore window diameter is larger than 4.3 A
ALULAV	Pore window diameter is larger than 4.3 A
IXOFAD	Pore window diameter is larger than 4.3 A
ZINDAD	Pore window diameter is larger than 4.3 A
LUYHAP	Pore window diameter is larger than 4.3 A
ALUKOI	Pore window diameter is larger than 4.3 A
BEFGEA	Pore window diameter is larger than 4.3 A
IZEPEJ	Pore window diameter is larger than 4.3 A
VACFOV01	Pore window diameter is larger than 4.3 A
ANUGIA	Pore window diameter is larger than 4.3 A
SABVUN	Pore window diameter is larger than 4.3 A
REBCAE	Pore window diameter is larger than 4.3 A
TAZLOX	Pore window diameter is larger than 4.3 A
REWNEO	Pore window diameter is larger than 4.3 A
TAZLIR	Pore window diameter is larger than 4.3 A
AFOTOF	Pore window diameter is larger than 4.3 A
ALUKIC	Pore window diameter is larger than 4.3 A
YAPLUY	Pore window diameter is larger than 4.3 A
YUGLES	Pore window diameter is larger than 4.3 A
PARNIH	Pore window diameter is larger than 4.3 A
YAPLIM	Pore window diameter is larger than 4.3 A
HOMZEP	Pore window diameter is larger than 4.3 A
ALUKUO	Pore window diameter is larger than 4.3 A
DAXHUH	Pore window diameter is larger than 4.3 A
WEHHIC	Pore window diameter is larger than 4.3 A
KARLIA	Pore window diameter is larger than 4.3 A
EBEXAM	Pore window diameter is larger than 4.3 A
TAZLUD	Pore window diameter is larger than 4.3 A
CEKHIL	Pore window diameter is larger than 4.3 A
ABEMIF	Pore window diameter is larger than 4.3 A
VACFOV	Pore window diameter is larger than 4.3 A
SADLEQ	Pore window diameter is larger than 4.3 A
DAXHUH01	Pore window diameter is larger than 4.3 A
PEPLEC	Pore window diameter is larger than 4.3 A
AFOTUL	Pore window diameter is larger than 4.3 A
MEGBEH	Pore window diameter is larger than 4.3 A
OHOFIA	Pore window diameter is larger than 4.3 A
GAYPED	Pore window diameter is larger than 4.3 A
RIFDUG01	Pore window diameter is larger than 4.3 A
OPENUT	Pore window diameter is larger than 4.3 A
XEXLOD	Pore window diameter is larger than 4.3 A
HAPHUD	Pore window diameter is larger than 4.3 A
VEHJUP	Pore window diameter is larger than 4.3 A
TASVUG	Pore window diameter is larger than 4.3 A
AFOVOH	Pore window diameter is larger than 4.3 A
VEHJOJ	Pore window diameter is larger than 4.3 A
XICNOO01	Pore window diameter is larger than 4.3 A
PEPFAT	Pore window diameter is larger than 4.3 A
HIGRIA	Pore window diameter is larger than 4.3 A
AFOVEX	Pore window diameter is larger than 4.3 A
LEVLEF	Pore window diameter is larger than 4.3 A
EGELUY	Pore window diameter is larger than 4.3 A
WEHJAW	Pore window diameter is larger than 4.3 A
NUTQAV	Pore window diameter is larger than 4.3 A
MURCOR	Pore window diameter is larger than 4.3 A
FAGREM	Pore window diameter is larger than 4.3 A
WAYMOA	Pore window diameter is larger than 4.3 A
RULQIY	Pore window diameter is larger than 4.3 A
DUXKUD	Pore window diameter is larger than 4.3 A
WAYMIU	Pore window diameter is larger than 4.3 A
XONGUD	Pore window diameter is larger than 4.3 A
TIVYAZ01	Pore window diameter is larger than 4.3 A
DAXHIV	Pore window diameter is larger than 4.3 A
TONLOY	Pore window diameter is larger than 4.3 A
JEDKEJ	Pore window diameter is larger than 4.3 A
HAFQOW	Pore window diameter is larger than 4.3 A
REWNEO01	Pore window diameter is larger than 4.3 A
ZARQAM	Pore window diameter is larger than 4.3 A
COYCID	Pore window diameter is larger than 4.3 A
GAWLIB	Pore window diameter is larger than 4.3 A
FURRUG01	Pore window diameter is larger than 4.3 A
DAXHIV01	Pore window diameter is larger than 4.3 A
GALCAZ	Pore window diameter is larger than 4.3 A
OSIKUX	Pore window diameter is larger than 4.3 A
ANUGUM	Pore window diameter is larger than 4.3 A
GADMAA	Pore window diameter is larger than 4.3 A
KIPKEB	Pore window diameter is larger than 4.3 A
QONQEQ	Pore window diameter is larger than 4.3 A
IYUHUG	Pore window diameter is larger than 4.3 A
NAYGUR	Pore window diameter is larger than 4.3 A
DEBWEO	Pore window diameter is larger than 4.3 A
ACIBOE	Pore window diameter is larger than 4.3 A
KOHKOI	Pore window diameter is larger than 4.3 A
KEFBEE	Pore window diameter is larger than 4.3 A
VEHXEN	Pore window diameter is larger than 4.3 A
EGELUY01	Pore window diameter is larger than 4.3 A
DEBWAK	Pore window diameter is larger than 4.3 A
NIJZOV	Pore window diameter is larger than 4.3 A
WEVQIX	Pore window diameter is larger than 4.3 A
YURKEC	Pore window diameter is larger than 4.3 A
ANUGOG	Pore window diameter is larger than 4.3 A
SUKYIH	Pore window diameter is larger than 4.3 A
REXDIJ	Pore window diameter is larger than 4.3 A
KIPKAX	Pore window diameter is larger than 4.3 A
KIJRUS	Pore window diameter is larger than 4.3 A
MURCIL	Pore window diameter is larger than 4.3 A
EXEQII	Pore window diameter is larger than 4.3 A
PEWGEF	Pore window diameter is larger than 4.3 A
EHALOP	Pore window diameter is larger than 4.3 A
EXEQAA	Pore window diameter is larger than 4.3 A
SENWOZ	Pore window diameter is larger than 4.3 A
MOXNUJ	Pore window diameter is larger than 4.3 A
WEVQOD	Pore window diameter is larger than 4.3 A
HAFVUH	Pore window diameter is larger than 4.3 A
NIKDAM	Pore window diameter is larger than 4.3 A
KOHKIC	Pore window diameter is larger than 4.3 A
HUXWAY	Pore window diameter is larger than 4.3 A
DARSEV	Pore window diameter is larger than 4.3 A
RUVKAV	Pore window diameter is larger than 4.3 A
IVETOT	Pore window diameter is larger than 4.3 A
[truncated: 2,765 more rows]
